# Supplementary material for: Controllable chemoselectivity in the coupling of bromoalkynes with alcohols under visible-light irradiation without additives: synthesis of propargyl alcohols and α-ketoesters
Source: Royal Society of Chemistry journal article supplement (doi:10.1039/c9cc04090k), 2019-01-01

## *Supporting Information*

# **Controllable Chemoselectivity in Coupling of Bromoalkynes with Alcohols under Visible-Light Irradiation without Additives: Synthesis of Propargyl Alcohols and $\alpha$ -Ketoesters**

Ke Ni,<sup>†</sup> Ling-Guo Meng,<sup>\*†</sup> Hongjie Ruan,<sup>†</sup> and Lei Wang<sup>\*†,‡</sup>

<sup>†</sup> Department of Chemistry, Huaibei Normal University, Huaibei, Anhui 235000, P. R. China

<sup>‡</sup> State Key Laboratory of Organometallic Chemistry, Shanghai Institute of Organic Chemistry,

Chinese Academy of Sciences, Shanghai 200032, P. R. China

*milig@126.com; leiwang88@hotmail.com*

### *Table of Contents*

|                                                                                                                                                                     |    |
|---------------------------------------------------------------------------------------------------------------------------------------------------------------------|----|
| 1. General remarks.....                                                                                                                                             | 2  |
| 2. Optimization of reaction conditions for coupling of bromoalkynes with alcohols.....                                                                              | 3  |
| 3. General procedure for the synthesis of $\alpha$ -ketoesters.....                                                                                                 | 4  |
| 4. General procedure for the synthesis of propargyl alcohols .....                                                                                                  | 4  |
| 5. Optimization of the solvent on the reaction (for alcohol: C atoms $\geq 3$ ) .....                                                                               | 5  |
| 6. HRMS analysis for the intermediate <b>C</b> (or <b>E</b> ), possible oxidation product of <b>1a</b> , and the coupling product of <b>1a</b> with <b>1g</b> ..... | 6  |
| 7. Kinetic isotope effect (KIE) experiments.....                                                                                                                    | 9  |
| 8. UV-Vis experiments.....                                                                                                                                          | 11 |
| 9. EPR experiments.....                                                                                                                                             | 12 |
| 10. Characterization data for 4,4-dibromobut-3-en-1-yne-1,3-diyl)dibenzene .....                                                                                    | 12 |
| 11. Characterization data for bromoalkynes ( <b>1b–1n</b> ) .....                                                                                                   | 14 |
| 12. Characterization data for all products.....                                                                                                                     | 18 |
| 13. <sup>1</sup> H and <sup>13</sup> C NMR spectra of bromoalkynes ( <b>1b–1n</b> ) and all products .....                                                          | 34 |

## 1. General remarks

All reactions were conducted in clean glassware with magnetic stirring. Chromatographic purification was performed on silica gel (400~500 mesh) and analytical thin layer chromatography (TLC) on silica gel 60-F<sub>254</sub> (Qindao), which was detected by fluorescence. <sup>1</sup>H NMR (400 MHz) and <sup>13</sup>C NMR (100 MHz) spectra were measured with a Bruker AC 400 spectrometer with CDCl<sub>3</sub> as solvent and recorded in ppm relative to internal tetramethylsilane standard. NMR data are reported as follows:  $\delta$ , chemical shift; coupling constants ( $J$  are given in Hertz, Hz) and integration. Abbreviations to denote the multiplicity of a particular signal were s (singlet), d (doublet), t (triplet), q (quartet), m (multiplet), and br (broad singlet). High resolution mass spectra were obtained with a Micromass GCT-TOF mass spectrometer. Melting points were determined on a digital melting point apparatus and temperatures were uncorrected. GC-MS spectra were measured with GCMS-QP2010 Plus. All light sources are purchased from the market without any particularity.

## 2. Optimization of reaction conditions for coupling of bromoalkynes with alcohols

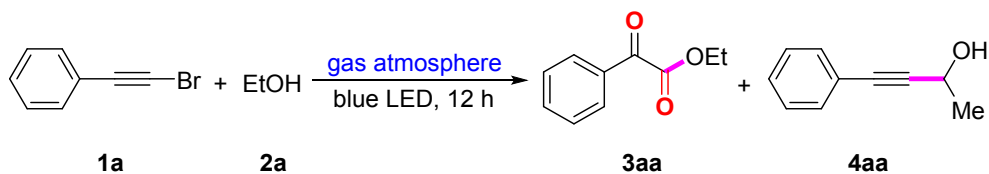

| Entry | Light source ( nm )  | Gas atmosphere | Yield of <b>3aa</b> (%) <sup>a</sup> | Yield of <b>4aa</b> (%) <sup>a</sup> |
|-------|----------------------|----------------|--------------------------------------|--------------------------------------|
| 1     | Blue LED (420–470)   | Air            | 57                                   | Trace                                |
| 2     | Blue LED (420–470)   | O <sub>2</sub> | 73                                   | Trace                                |
| 3     | Blue LED (420–425)   | O <sub>2</sub> | 12                                   | Trace                                |
| 4     | Blue LED (450–455)   | O <sub>2</sub> | 53                                   | Trace                                |
| 5     | —                    | O <sub>2</sub> | Trace                                | Trace                                |
| 6     | Red LED (610–650)    | O <sub>2</sub> | NR                                   | NR                                   |
| 7     | Yellow LED (570–610) | O <sub>2</sub> | NR                                   | NR                                   |
| 8     | Green LED (480–570)  | O <sub>2</sub> | Trace                                | Trace                                |
| 9     | Blue LED (420–470)   | N <sub>2</sub> | Trace                                | 15 <sup>b</sup>                      |
| 10    | Blue LED (420–425)   | N <sub>2</sub> | Trace                                | 37 <sup>b</sup>                      |
| 11    | Blue LED (450–455)   | N <sub>2</sub> | Trace                                | 18 <sup>b</sup>                      |
| 12    | Blue LED (420–425)   | N <sub>2</sub> | Trace                                | 45 <sup>c</sup>                      |
| 13    | Blue LED (420–425)   | N <sub>2</sub> | Trace                                | 51 <sup>c,d</sup>                    |
| 14    | Blue LED (420–425)   | N <sub>2</sub> | Trace                                | 63 <sup>c,e</sup>                    |
| 15    | Blue LED (420–425)   | N <sub>2</sub> | Trace                                | 54 <sup>c,f</sup>                    |

Reaction conditions: **1a** (0.30 mmol), **2a** (2 mL), light source, room temperature for 12 h. <sup>a</sup>Isolated yield. <sup>b</sup>For 36 h. <sup>c</sup>For 48 h. <sup>d</sup>**2a** (4 mL) was used. <sup>e</sup>**2a** (6 mL) was used. <sup>f</sup>**2a** (10 mL) was used.

### 3. General procedure for the synthesis of $\alpha$ -ketoesters

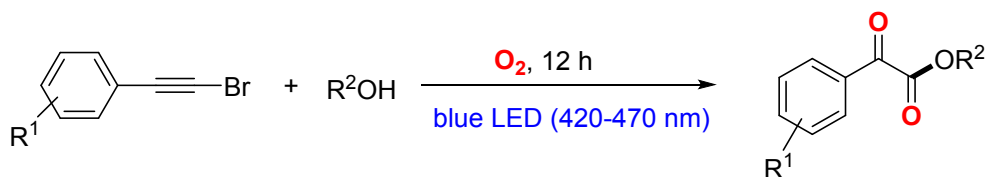

Bromoalkyne (0.20 mmol) was dissolved in ethanol or methanol (2.0 mL). The mixture was stirred tightly with the blue LED (420–470 nm) light source in  $O_2$  for 12 h. Then, the residue was purified by column chromatography on silica gel (20:1 petroleum ether/EtOAc) to give the pure product [Note:  $CH_3CN$  was used as solvent when bromoalkynes were reacted with other alcohols (containing C atoms  $\geq 3$ , 2.0 mmol)].

### 4. General procedure for the synthesis of propargyl alcohols

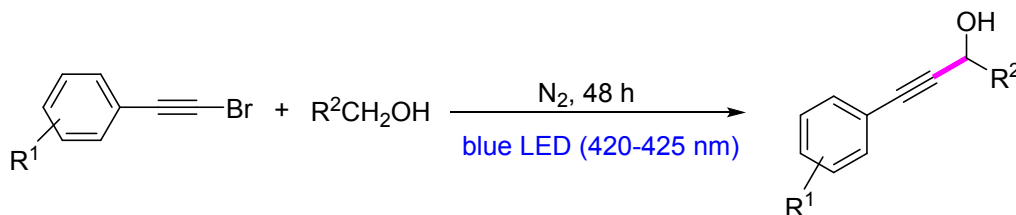

Bromoalkyne (0.20 mmol) was dissolved in alcohol (6.0 mL). The mixture was stirred tightly with the blue LED (420–425 nm) light source in  $N_2$  for 48 h. Then, the residue was purified by column chromatography on silica gel (1:2 petroleum ether/ $CH_2Cl_2$ ) to give the pure product.

## 5. Optimization of the solvent on the reaction (For alcohol: C atoms $\geq 3$ )

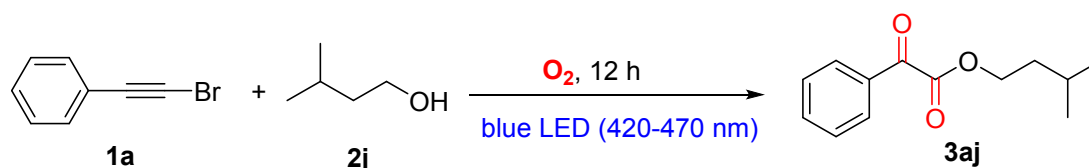

| Entry | Solvent                         | Yield <sup>b</sup> (%) |
|-------|---------------------------------|------------------------|
| 1     | CH <sub>3</sub> CN              | 51                     |
| 2     | EtOAc                           | 40                     |
| 3     | Ether                           | 39                     |
| 4     | THF                             | 35                     |
| 5     | 1,4-Dioxane                     | 33                     |
| 6     | CH <sub>2</sub> Cl <sub>2</sub> | < 10                   |
| 7     | DCE                             | < 10                   |
| 8     | Toluene                         | < 10                   |
| 9     | DMF                             | < 10                   |
| 10    | DMSO                            | < 10                   |
| 11    | CH <sub>3</sub> CN              | 39 <sup>c</sup>        |
| 12    | CH <sub>3</sub> CN              | 62 <sup>d</sup>        |
| 13    | CH <sub>3</sub> CN              | 76 <sup>e</sup>        |
| 14    | CH <sub>3</sub> CN              | 68 <sup>f</sup>        |

<sup>a</sup>Reaction conditions: **1a** (0.30 mmol), **2j** (0.60 mmol), blue LED (420–470 nm), solvent (2.0 mL), in O<sub>2</sub> atmosphere, room temperature for 12 h.

<sup>b</sup>Isolated yield. <sup>c</sup>**2j** (0.30 mmol) was used. <sup>d</sup>**2j** (1.0 mmol) was used. <sup>e</sup>**2j** (2.0 mmol) was used. <sup>f</sup>**2j** (3.0 mmol) was used.

## 6. HRMS analysis for the intermediate **C** (or **E**), possible oxidation product of **1a**, and the coupling product of **1a** with **1g**

The HRMS studies (Schemes 4b and 4c) were tested to prove the formation of possible key intermediate **C** (or **E**), and which could be detected when 2,2,6,6-tetramethylpiperidinyl-1-oxyl (TEMPO) was added under different conditions (one condition is formation of  $\alpha$ -ketoesters, and another condition is formation of propargyl alcohol), but we could not be sure which one was coupled with TEMPO (one or both of them have). Further possible generation of byproducts (oxidation product of **1a**) and the different dimer products of **1a** with **1g** were also observed by HRMS studies, which imply that the initiation of the reaction might be started from the homolysis of bromoalkynes.

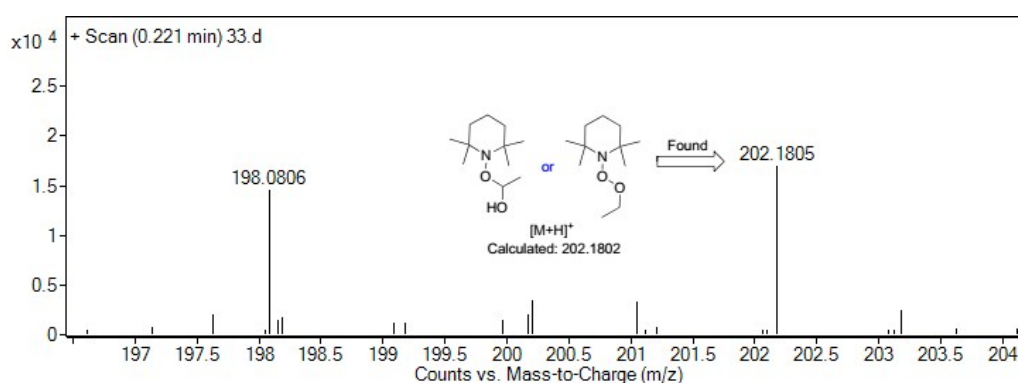

### HRMS analysis of **C** or **E** for Scheme 4b of control experiment

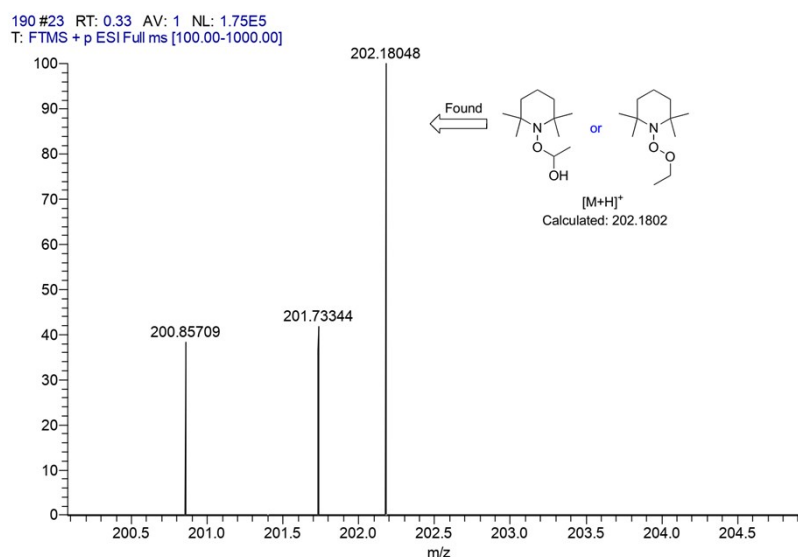

### HRMS analysis of **C** or **E** for Scheme 4c of control experiment

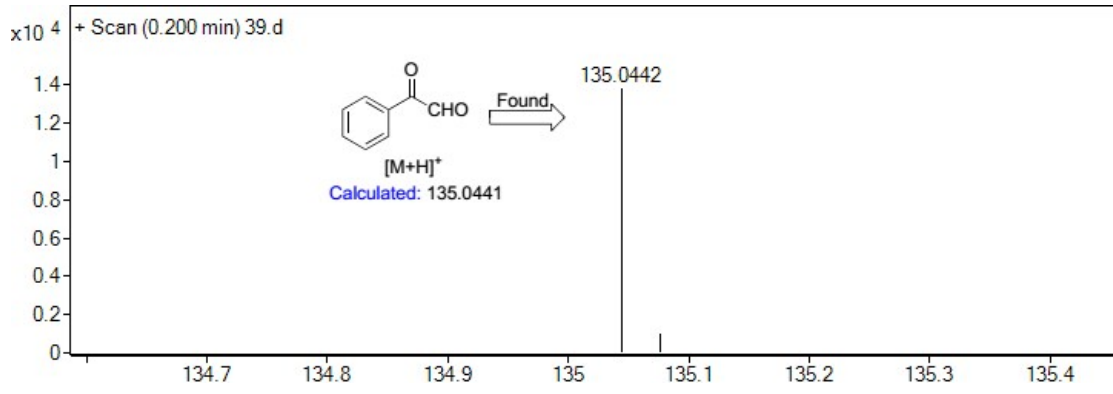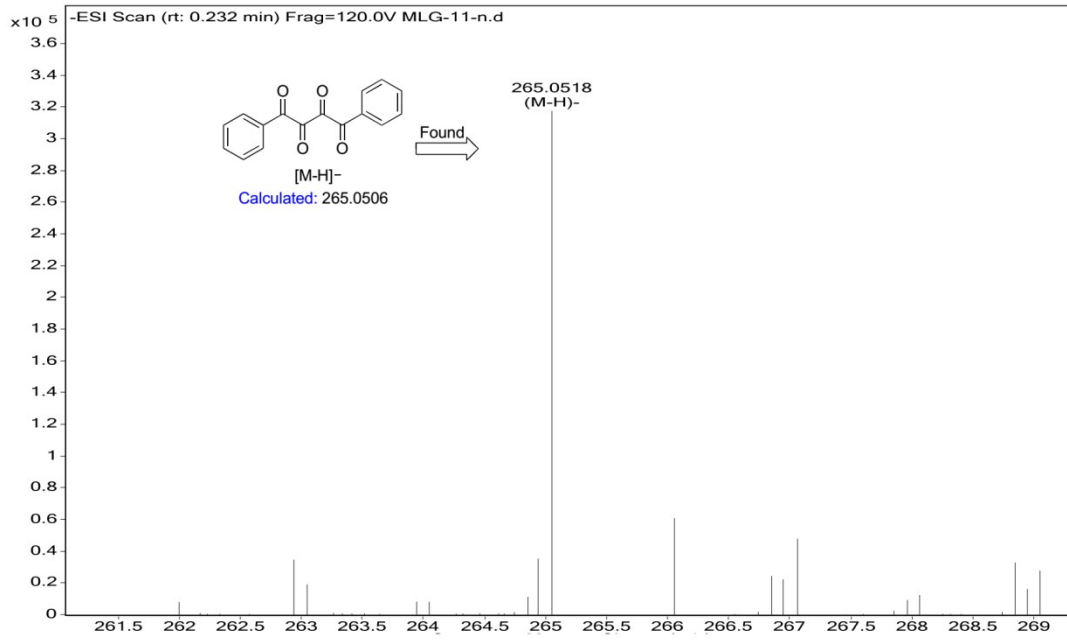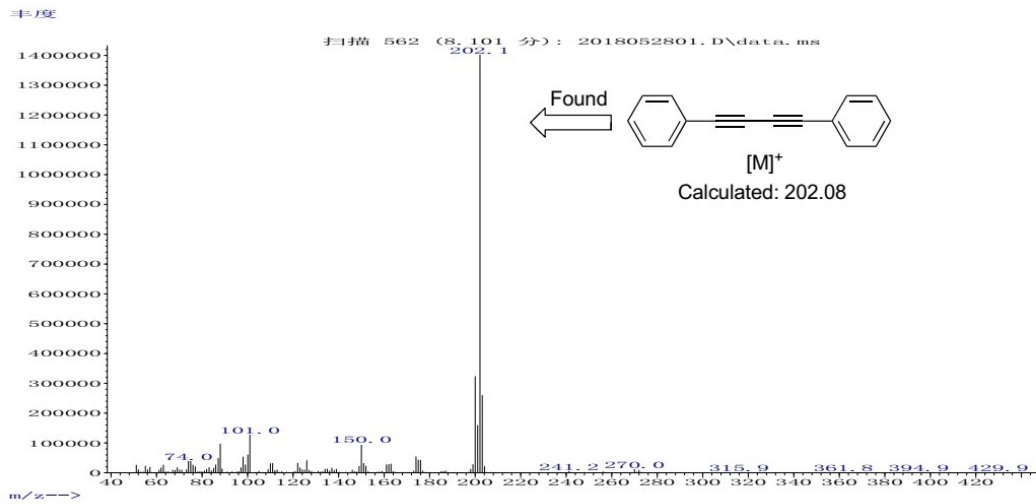

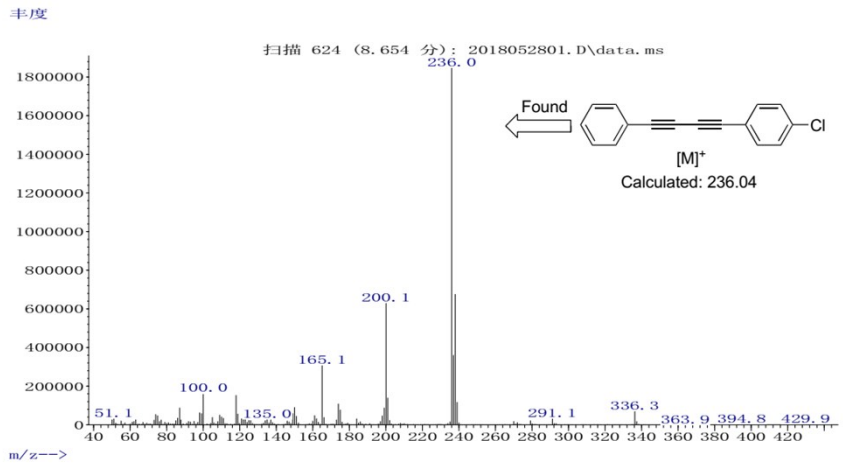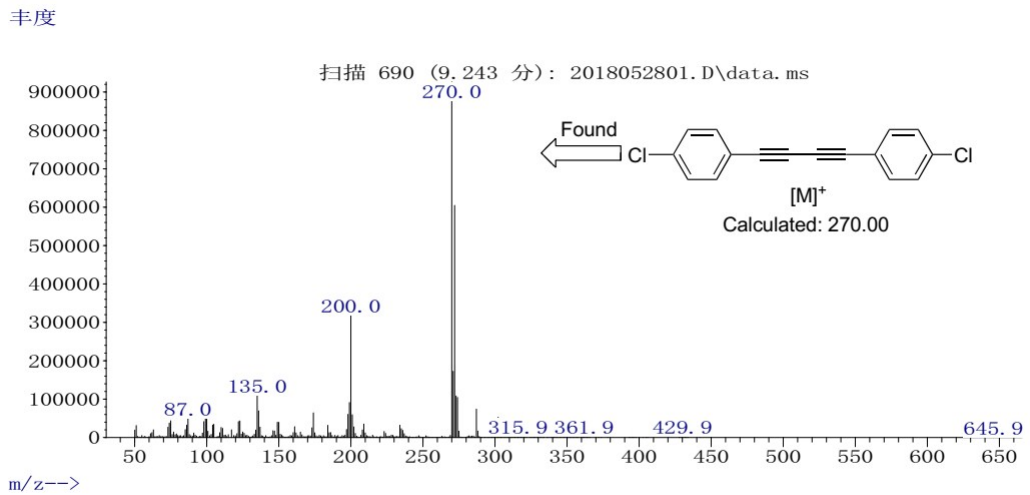



## 7. Kinetic isotope effect (KIE) experiments

### 7.1 KIE experiment (I)

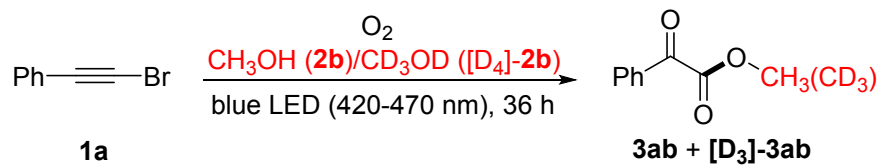

Phenylethynyl bromide (**1a**, 0.20 mmol) was dissolved in mixture of methanol (25 mmol) and D<sub>4</sub>-methanol (25 mmol). The mixture was stirred tightly with the blue LED (420–470 nm) irradiation in O<sub>2</sub> for 36 h. Then, the residue was purified by column chromatography on silica gel (20:1 petroleum ether/EtOAc) to give the pure product (6 mg, ~19% total yield). The KIE value ( $k_{\text{H}}/k_{\text{D}} = 1$ ) was determined by <sup>1</sup>H NMR (600 MHz) of **3ab** and [**D**<sub>3</sub>]-**3ab**.

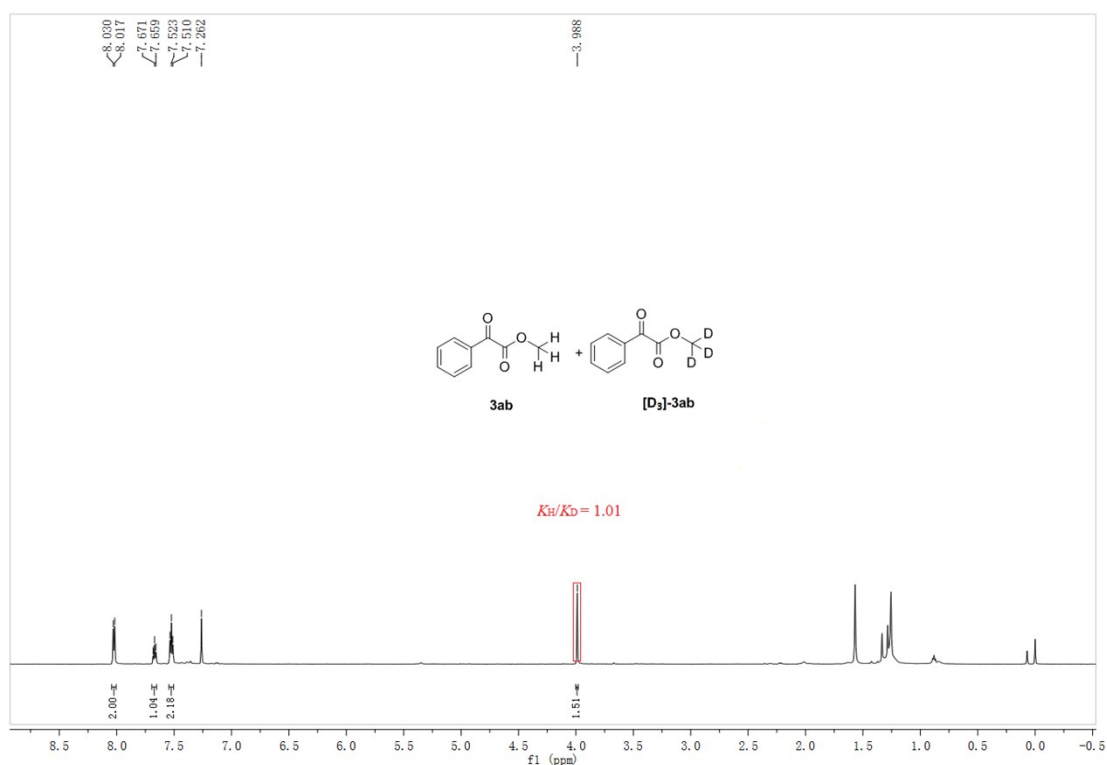

## 7.2 KIE experiment (II)

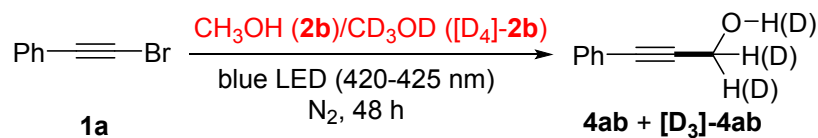

Phenylethynyl bromide (**1a**, 0.20 mmol) was dissolved in a mixture of methanol (36 mmol) and D<sub>4</sub>-methanol (36 mmol). The mixture was stirred tightly with the blue LED (420–425 nm) irradiation in N<sub>2</sub> for 48 h. Then, the residue was purified by column chromatography on silica gel (1:2 petroleum ether/CH<sub>2</sub>Cl<sub>2</sub>) to give the pure product (4 mg, ~16% total yield). The KIE value ( $k_{\text{H}}/k_{\text{D}} = 6.14$ ) was determined by <sup>1</sup>H NMR (600 MHz) of **4ab** and [**D**<sub>3</sub>]-**4ab**.

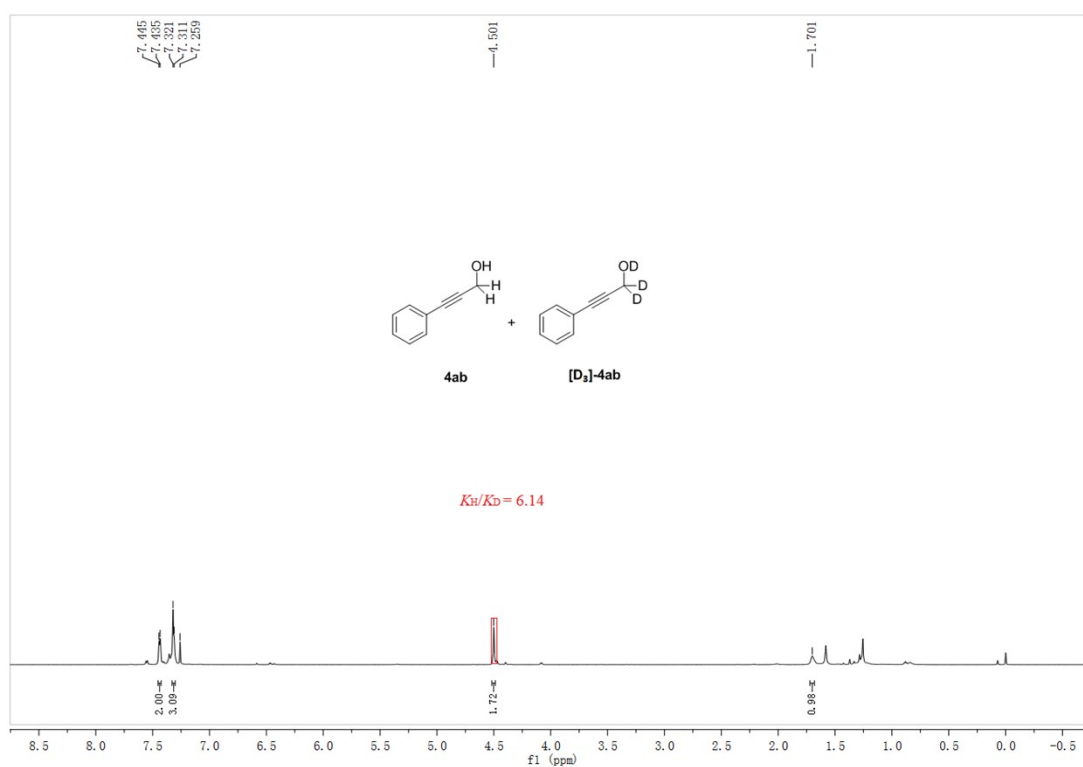

## 8. UV-Vis experiments

The UV-Vis measurement was performed with an ethanol solution of **1a**, indicating that an electron-donor acceptor (EDA) complex was not formed.

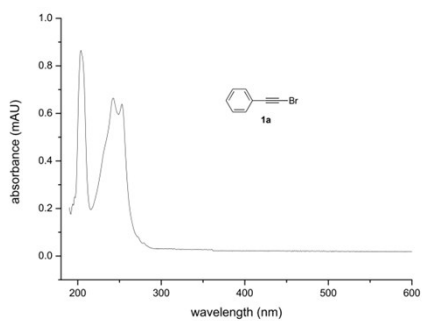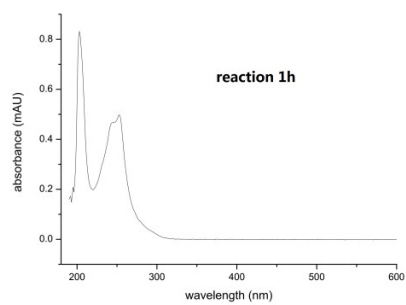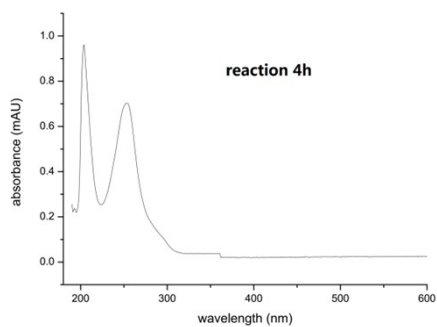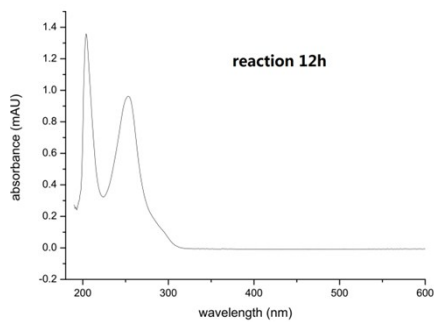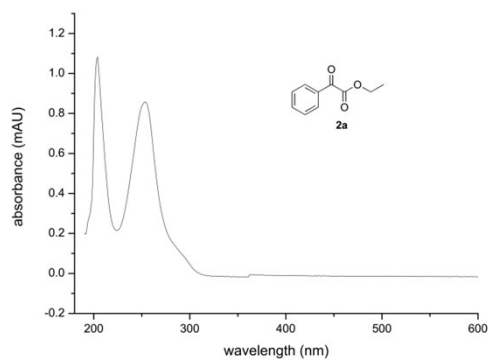

## 9. EPR experiments

The EPR were investigated under following conditions, which proved the non-existence of  $^1\text{O}_2$  during the formation of  $\alpha$ -ketoesters.

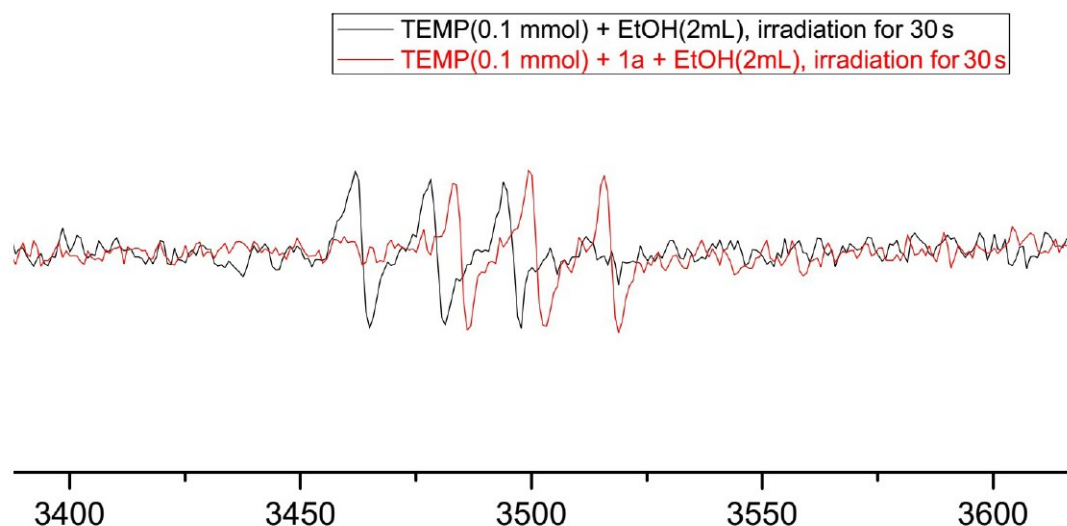

## 10. Characterization data for 4,4-dibromobut-3-en-1-yne-1,3-diyl)dibenzene

*Known compound*, see: V. K. Karapala, H.-P. Shih and C.-C. Han, *Org. Lett.*, 2018, **20**, 1550.

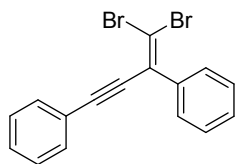

Pale yellow oil.  $^1\text{H}$  NMR (400 MHz,  $\text{CDCl}_3$ ):  $\delta$  7.54–7.49 (m, 4H), 7.45–7.39 (m, 3H), 7.37–7.31 (m, 3H).  $^{13}\text{C}$  NMR (100 MHz,  $\text{CDCl}_3$ ):  $\delta$  138.0, 131.5, 130.9, 128.9, 128.5, 128.5, 128.3, 128.3, 122.5, 98.9, 97.5, 88.9.

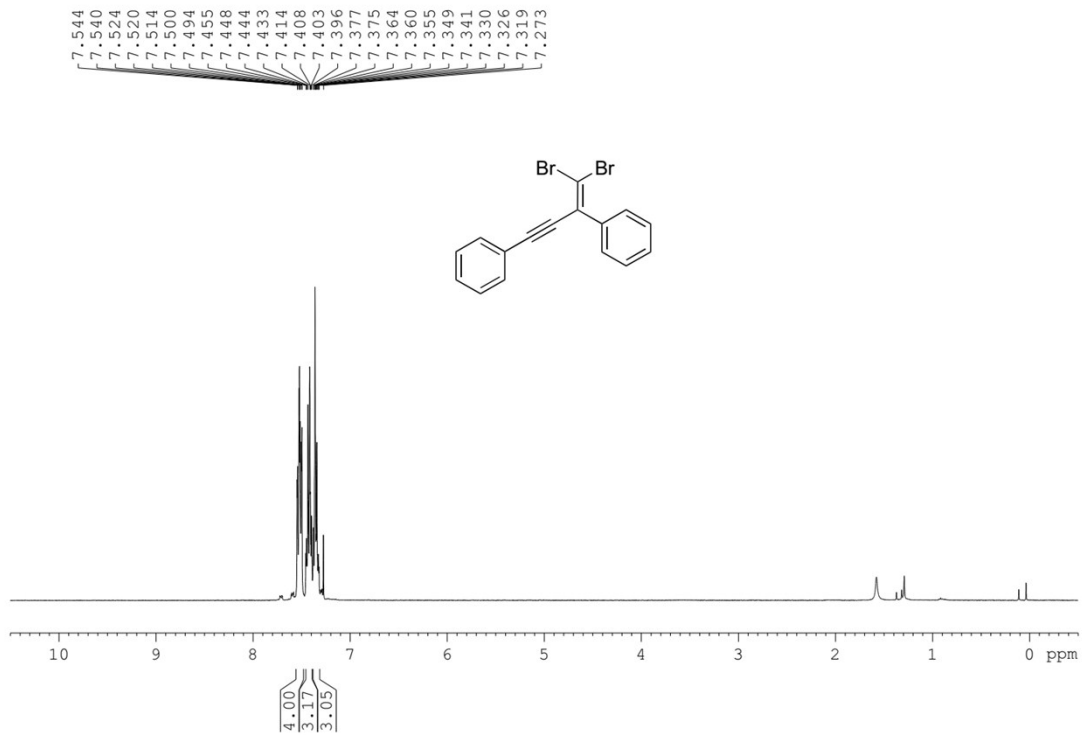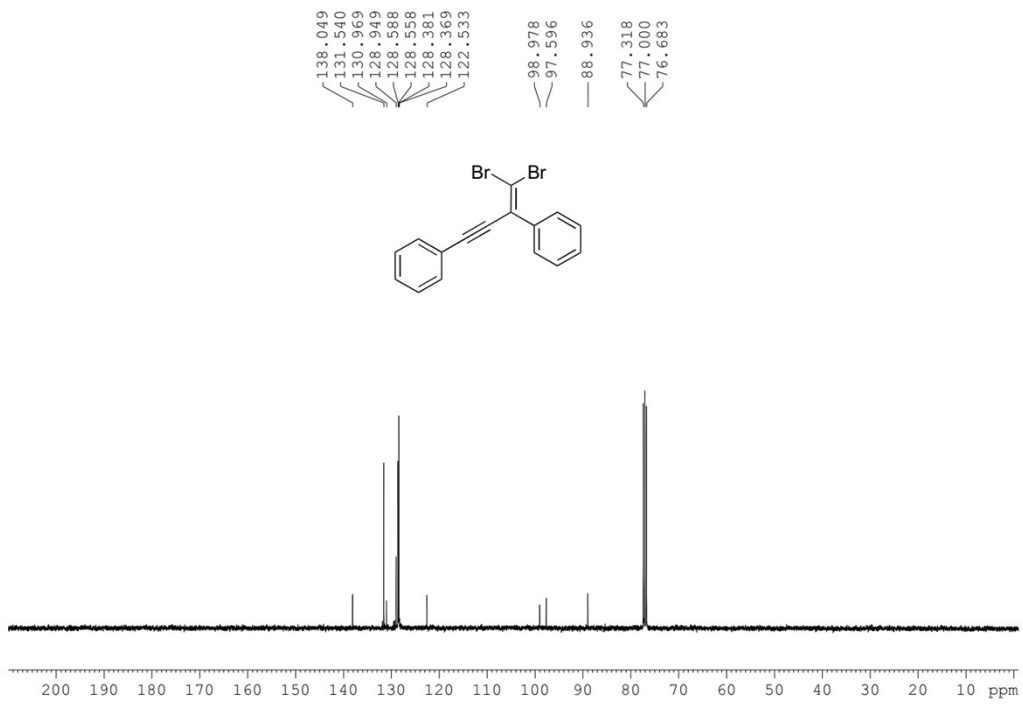

## 11. Characterization data for the bromoalkynes (1b–1n)

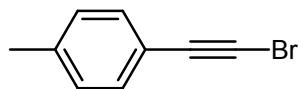

**1-(Bromoethynyl)-4-methylbenzene (1b).**<sup>1</sup> Yellow oil (163 mg, 84% yield). <sup>1</sup>H NMR (400 MHz, CDCl<sub>3</sub>): δ 7.37 (d, *J* = 8.0 Hz, 2H), 7.14 (d, *J* = 8.0 Hz, 2H), 2.36 (s, 3H). <sup>13</sup>C NMR (100 MHz, CDCl<sub>3</sub>): δ 138.8, 131.8, 129.0, 119.6, 80.1, 48.7, 21.4.

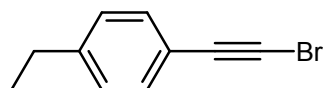

**1-(Bromoethynyl)-4-ethylbenzene (1c).**<sup>2</sup> Yellow oil (170 mg, 82% yield). <sup>1</sup>H NMR (400 MHz, CDCl<sub>3</sub>): δ 7.39 (d, *J* = 8.0 Hz, 2H), 7.16 (d, *J* = 8.0 Hz, 2H), 2.68 (q, *J* = 7.6 Hz, 2H), 1.26 (t, *J* = 7.6 Hz, 3H). <sup>13</sup>C NMR (100 MHz, CDCl<sub>3</sub>): δ 145.1, 131.9, 127.8, 119.8, 80.1, 48.6, 28.8, 15.2.

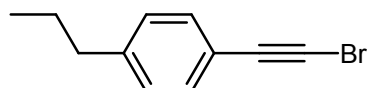

**1-(Bromoethynyl)-4-propylbenzene (1d).**<sup>3</sup> Yellow oil (180 mg, 81% yield). <sup>1</sup>H NMR (400 MHz, CDCl<sub>3</sub>): δ 7.39 (d, *J* = 8.0 Hz, 2H), 7.14 (d, *J* = 8.0 Hz, 2H), 2.61 (t, *J* = 7.2 Hz, 2H), 1.69 (sextet, *J* = 7.2 Hz, 2H), 0.97 (t, *J* = 7.2 Hz, 3H). <sup>13</sup>C NMR (100 MHz, CDCl<sub>3</sub>): δ 143.6, 131.8, 128.4, 119.8, 80.2, 48.7, 37.9, 24.2, 13.7.

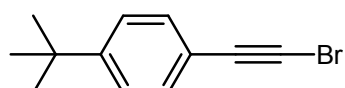

**1-(Bromoethynyl)-4-(*tert*-butyl)benzene (1e).**<sup>3</sup> Colorless oil (185 mg, 78% yield). <sup>1</sup>H NMR (400 MHz, CDCl<sub>3</sub>): δ 7.31–7.39 (m, 2H), 7.35–7.33 (m, 2H), 1.32 (s, 9H). <sup>13</sup>C NMR (100 MHz, CDCl<sub>3</sub>): δ 151.9, 131.7, 125.3, 119.6, 80.1,

48.6, 34.8, 31.3.

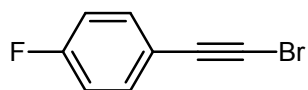

**1-(Bromoethynyl)-4-fluorobenzene (1f).**<sup>2</sup> Yellow oil (155 mg, 78% yield). <sup>1</sup>H NMR (400 MHz, CDCl<sub>3</sub>): δ 7.46–7.41 (m, 2H), 7.04–6.99 (m, 2H). <sup>13</sup>C NMR (100 MHz, CDCl<sub>3</sub>): δ 163.9 (d, *J* = 248.7 Hz), 133.9 (d, *J* = 8.5 Hz), 118.8 (d, *J* = 3.5 Hz), 115.7 (d, *J* = 22.0 Hz), 79.0, 49.5.

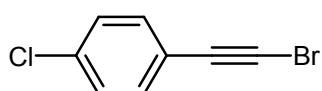

**1-(Bromoethynyl)-4-chlorobenzene (1g).**<sup>1</sup> White solid (174 mg, 81% yield). Mp: 88–90 °C. <sup>1</sup>H NMR (400 MHz, CDCl<sub>3</sub>): δ 7.40–7.37 (m, 2H), 7.31–7.28 (m, 2H). <sup>13</sup>C NMR (100 MHz, CDCl<sub>3</sub>): δ 134.8, 133.2, 128.7, 121.1, 79.0, 51.0.

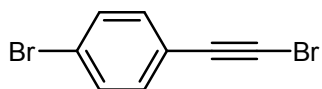

**1-Bromo-4-(bromoethynyl)benzene (1h).**<sup>1</sup> White solid (207 mg, 80% yield). Mp: 100–101 °C. <sup>1</sup>H NMR (400 MHz, CDCl<sub>3</sub>): δ 7.47–7.44 (m, 2H), 7.33–7.29 (m, 2H). <sup>13</sup>C NMR (100 MHz, CDCl<sub>3</sub>): δ 133.4, 131.6, 123.0, 121.6, 79.0, 51.2.

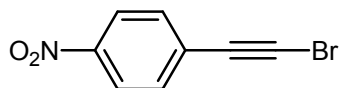

**1-(Bromoethynyl)-4-nitrobenzene (1i).**<sup>1</sup> Yellow solid (171 mg, 76% yield). Mp: 170–172 °C. <sup>1</sup>H NMR (400 MHz, CDCl<sub>3</sub>): δ 8.21–8.18 (m, 2H), 7.62–7.58 (m, 2H). <sup>13</sup>C NMR (100 MHz, CDCl<sub>3</sub>): δ 147.3, 132.8, 129.4, 123.6, 78.4, 56.3.

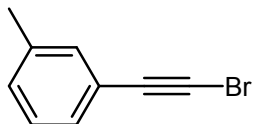

**1-(Bromoethynyl)-3-methylbenzene (1j).**<sup>2</sup> Yellow oil (144 mg, 74% yield).

<sup>1</sup>H NMR (400 MHz, CDCl<sub>3</sub>): δ 7.30–7.27 (m, 2H), 7.24–7.16 (m, 2H), 2.35 (s, 3H). <sup>13</sup>C NMR (100 MHz, CDCl<sub>3</sub>): δ 138.0, 132.5, 129.5, 129.0, 128.2, 122.5, 80.2, 49.2, 21.7.

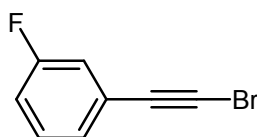

**1-(Bromoethynyl)-3-fluorobenzene (1k).**<sup>4</sup> Yellow oil (149 mg, 75% yield).

<sup>1</sup>H NMR (400 MHz, CDCl<sub>3</sub>): δ 7.31–7.22 (m, 2H), 7.17–7.13 (m, 1H), 7.09–7.04 (m, 1H). <sup>13</sup>C NMR (100 MHz, CDCl<sub>3</sub>): δ 163.4 (d, *J* = 245.5 Hz), 129.9 (d, *J* = 8.4 Hz), 127.9 (d, *J* = 3.0 Hz), 124.5 (d, *J* = 9.5 Hz), 118.9 (d, *J* = 23.0 Hz), 116.2 (d, *J* = 21.1 Hz), 78.8, 51.2.

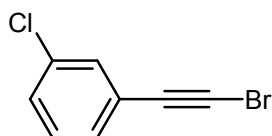

**1-(Bromoethynyl)-3-chlorobenzene (1l).**<sup>1</sup> Yellow oil (169 mg, 79% yield). <sup>1</sup>H

NMR (400 MHz, CDCl<sub>3</sub>): δ 7.45 (t, *J* = 1.6 Hz, 1H), 7.34–7.32 (m, 2H), 7.27–7.23 (m, 1H). <sup>13</sup>C NMR (100 MHz, CDCl<sub>3</sub>): δ 134.1, 131.8, 130.1, 129.5, 129.0, 124.3, 78.7, 51.4.

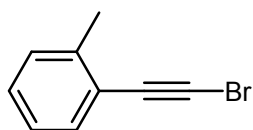

**1-(Bromoethynyl)-2-methylbenzene (1m).**<sup>1</sup> Yellow oil (146 mg, 75% yield).

<sup>1</sup>H NMR (400 MHz, CDCl<sub>3</sub>): δ 7.45 (d, *J* = 7.6 Hz, 1H), 7.28–7.20 (m, 2H),



7.17–7.13 (m, 1H), 2.46 (s, 3H). <sup>13</sup>C NMR (100 MHz, CDCl<sub>3</sub>): δ 140.8, 132.3, 129.4, 128.6, 125.5, 122.5, 79.1, 52.7, 20.5.

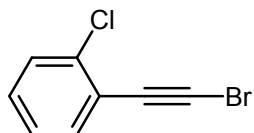

**1-(Bromoethynyl)-2-chlorobenzene (1n).**<sup>1</sup> Colorless oil (159 mg, 74% yield). <sup>1</sup>H NMR (400 MHz, CDCl<sub>3</sub>): δ 7.50 (dd, *J* = 1.2, 7.6 Hz 1H), 7.41 (dd, *J* = 0.8, 8.0 Hz, 1H), 7.30 (td, *J* = 1.2, 7.6 Hz, 1H), 7.23 (td, *J* = 1.2, 7.6 Hz, 1H). <sup>13</sup>C NMR (100 MHz, CDCl<sub>3</sub>): δ 136.3, 133.8, 129.6, 129.3, 126.4, 122.6, 76.9, 55.2.

#### Reference:

1. X. Y. Chen, L. Wang, M. Frings and C. Bolm, *Org. Lett.*, 2014, **16**, 3796.
2. Y.-S. Feng, Z.-Q. Xu, L. Mao, F.-F. Zhang and H.-J. Xu, *Org. Lett.*, 2013, **15**, 1472.
3. K. K. Rajbongshi, D. Hazarika and P. Phukan, *Tetrahedron*, 2016, **72**, 4151.
4. K. Villeneuve, N. Riddell, R. W. Jordan, G. C. Tsui and W. Tam, *Org. Lett.*, 2004, **6**, 4543.

## 12. Characterization data for all products

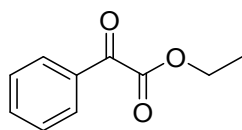

**Ethyl 2-oxo-2-phenylacetate (3aa).**<sup>1</sup> Colorless oil (39 mg, 73% yield). <sup>1</sup>H NMR (400 MHz, CDCl<sub>3</sub>): δ 8.02–8.00 (m, 2H), 7.68–7.64 (m, 1H), 7.53 (t, *J* = 8.0 Hz, 2H), 4.48 (q, *J* = 7.2 Hz, 2H), 1.44 (t, *J* = 7.2 Hz, 3H). <sup>13</sup>C NMR (100 MHz, CDCl<sub>3</sub>): δ 186.4, 163.8, 134.8, 132.4, 130.0, 128.8, 62.3, 14.1.

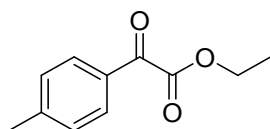

**Ethyl 2-oxo-2-(*p*-tolyl)acetate (3ba).**<sup>2</sup> Pale yellow oil (44 mg, 76% yield). <sup>1</sup>H NMR (400 MHz, CDCl<sub>3</sub>): δ 7.91 (d, *J* = 8.4, 2H), 7.31 (d, *J* = 8.0 Hz, 2H), 4.46 (q, *J* = 7.2 Hz, 2H), 2.43 (s, 3H), 1.43 (t, *J* = 7.2 Hz, 3H). <sup>13</sup>C NMR (100 MHz, CDCl<sub>3</sub>): δ 186.0, 164.0, 146.1, 130.1, 130.0, 129.6, 62.1, 21.8, 14.0.

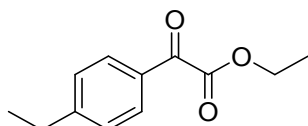

**Ethyl 2-(4-ethylphenyl)-2-oxoacetate (3ca).**<sup>3</sup> Pale yellow oil (43 mg, 70% yield). <sup>1</sup>H NMR (400 MHz, CDCl<sub>3</sub>): δ 7.87 (d, *J* = 8.0 Hz, 2H), 7.27 (d, *J* = 7.6 Hz, 2H), 4.40 (q, *J* = 7.2 Hz, 2H), 2.68 (q, *J* = 7.6 Hz, 2H), 1.36 (t, *J* = 7.2 Hz, 3H), 1.21 (t, *J* = 7.6 Hz, 3H). <sup>13</sup>C NMR (100 MHz, CDCl<sub>3</sub>): δ 186.1, 164.0, 152.3, 130.3, 130.2, 128.4, 62.2, 29.1, 15.0, 14.1.

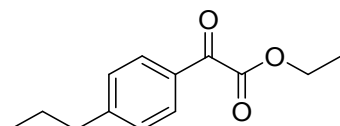

**Ethyl 2-oxo-2-(4-propylphenyl)acetate (3da).**<sup>4</sup> Pale yellow oil (47 mg, 71% yield). <sup>1</sup>H NMR (400 MHz, CDCl<sub>3</sub>): δ 7.93 (d, *J* = 8.0 Hz, 2H), 7.32 (d, *J* = 8.0 Hz, 2H), 4.47 (q, *J* = 7.2 Hz, 2H), 2.68 (t, *J* = 7.2 Hz, 2H), 1.71 (sextet, *J* = 7.2 Hz, 2H), 1.43 (t, *J* = 7.2 Hz, 3H), 0.96 (t, *J* = 7.2 Hz, 3H). <sup>13</sup>C NMR (100 MHz, CDCl<sub>3</sub>): δ 186.1, 164.0, 150.8, 130.2, 130.1, 129.0, 62.1, 38.1, 24.0, 14.1, 13.7.

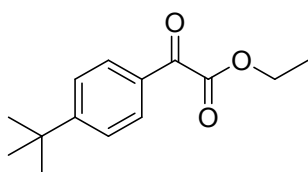

**Ethyl 2-(4-(*tert*-butyl)phenyl)-2-oxoacetate (3ea).**<sup>5</sup> Pale yellow oil (54 mg, 76% yield). <sup>1</sup>H NMR (400 MHz, CDCl<sub>3</sub>): δ 7.96–7.93 (m, 2H), 7.53–7.51 (m, 2H), 4.47 (q, *J* = 7.2 Hz, 2H), 1.43 (t, *J* = 7.2 Hz, 3H), 1.34 (s, 9H). <sup>13</sup>C NMR (100 MHz, CDCl<sub>3</sub>): δ 186.0, 164.0, 159.0, 130.0, 129.9, 125.9, 62.2, 35.3, 30.9, 14.1.

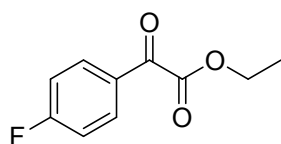

**Ethyl 2-(4-fluorophenyl)-2-oxoacetate (3fa).**<sup>2</sup> Pale yellow oil (46 mg, 78% yield). <sup>1</sup>H NMR (400 MHz, DMSO-*d*<sub>6</sub>): 8.08–8.03 (m, 2H), 7.46 (m, 2H), 4.43 (q, *J* = 7.2 Hz, 2H), 1.33 (t, *J* = 7.2 Hz, 3H). <sup>13</sup>C NMR (100 MHz, DMSO-*d*<sub>6</sub>): δ 185.4, 167.9 (*J* = 253.9 Hz), 163.7, 133.5 (*J* = 10.1 Hz), 129.1 (*J* = 2.7 Hz), 117.1 (*J* = 22.4 Hz), 62.8, 14.2.

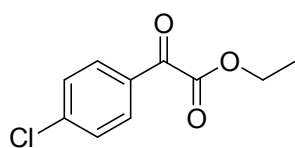

**Ethyl 2-(4-chlorophenyl)-2-oxoacetate (3ga).**<sup>2</sup> Pale yellow oil (47 mg, 74% yield). <sup>1</sup>H NMR (400 MHz, CDCl<sub>3</sub>): 8.00–7.97 (m, 2H), 7.50–7.47 (m, 2H),

4.47 (q,  $J = 7.2$  Hz, 2H), 1.44 (t,  $J = 7.2$  Hz, 3H).  $^{13}\text{C}$  NMR (100 MHz,  $\text{CDCl}_3$ ):  $\delta$  184.8, 163.2, 141.6, 131.4, 130.9, 129.2, 62.5, 14.0

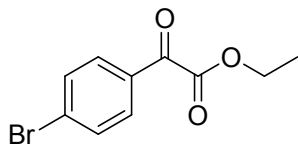

**Ethyl 2-(4-bromophenyl)-2-oxoacetate (3ha).**<sup>1</sup> Pale yellow oil (58 mg, 76% yield).  $^1\text{H}$  NMR (400 MHz,  $\text{CDCl}_3$ ):  $\delta$  7.90–7.88 (m, 2H), 7.66–7.64 (m, 2H), 4.47 (q,  $J = 7.2$  Hz, 2H), 1.43 (t,  $J = 7.2$  Hz, 3H).  $^{13}\text{C}$  NMR (100 MHz,  $\text{CDCl}_3$ ):  $\delta$  185.0, 163.1, 132.2, 131.4, 131.3, 130.4, 62.5, 14.0.

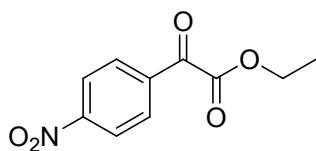

**Ethyl 2-(4-nitrophenyl)-2-oxoacetate (3ia).**<sup>6</sup> Pale yellow oil (35 mg, 52% yield).  $^1\text{H}$  NMR (400 MHz,  $\text{CDCl}_3$ ):  $\delta$  8.36 (d,  $J = 8.4$  Hz, 2H), 8.25 (d,  $J = 8.4$  Hz, 2H), 4.51 (q,  $J = 7.2$  Hz, 2H), 1.47 (t,  $J = 7.2$  Hz, 3H).  $^{13}\text{C}$  NMR (100 MHz,  $\text{CDCl}_3$ ):  $\delta$  184.1, 162.2, 151.1, 137.0, 131.2, 123.9, 63.0, 14.0.

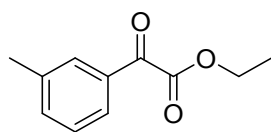

**Ethyl 2-oxo-2-(*m*-tolyl)acetate (3ja).**<sup>2</sup> Pale yellow oil (42 mg, 72% yield).  $^1\text{H}$  NMR (400 MHz,  $\text{CDCl}_3$ ):  $\delta$  7.80 (d,  $J = 7.2$  Hz, 2H), 7.47 (d,  $J = 7.6$  Hz, 1H), 7.41 (t,  $J = 8.0$  Hz, 1H), 4.47 (q,  $J = 7.2$  Hz, 2H), 2.42 (s, 3H), 1.44 (t,  $J = 7.2$  Hz, 3H).  $^{13}\text{C}$  NMR (100 MHz,  $\text{CDCl}_3$ ):  $\delta$  186.6, 164.0, 138.8, 135.7, 132.4, 130.2, 128.7, 127.3, 62.2, 21.2, 14.1.

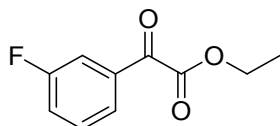

**Ethyl 2-(3-fluorophenyl)-2-oxoacetate (3ka).**<sup>7</sup> Pale yellow oil (41 mg, 69% yield). <sup>1</sup>H NMR (400 MHz, CDCl<sub>3</sub>): 7.83 (d, *J* = 7.6 Hz, 1H), 7.75 (dt, *J* = 2.4, 9.2 Hz, 1H), 7.53–7.48 (m, 1H), 7.38 (td, *J* = 2.8, 8.4 Hz, 1H), 4.48 (q, *J* = 7.2 Hz, 2H), 1.45 (t, *J* = 7.2 Hz, 3H). <sup>13</sup>C NMR (100 MHz, CDCl<sub>3</sub>): δ 184.9 (d, *J* = 2.5 Hz), 163.9 (d, *J* = 247.6 Hz), 163.0, 134.5 (d, *J* = 6.6 Hz), 130.6 (d, *J* = 7.7 Hz), 126.0 (d, *J* = 3.1 Hz), 122.1 (d, *J* = 21.4 Hz), 116.5 (d, *J* = 22.7 Hz), 62.5, 14.0.

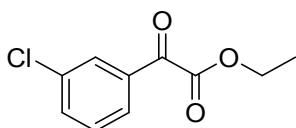

**Ethyl 2-(3-chlorophenyl)-2-oxoacetate (3la).**<sup>1</sup> Pale yellow oil (43 mg, 68% yield). <sup>1</sup>H NMR (400 MHz, CDCl<sub>3</sub>): δ 8.01 (t, *J* = 1.6 Hz, 1H), 7.92 (dt, *J* = 1.2, 7.6 Hz, 1H), 7.64 (ddd, *J* = 1.2, 2.0, 8.0 Hz, 1H), 7.48 (t, *J* = 8.0 Hz, 1H), 4.88 (q, *J* = 7.2 Hz, 2H), 1.45 (d, *J* = 7.2 Hz, 3H). <sup>13</sup>C NMR (100 MHz, CDCl<sub>3</sub>): δ 184.8, 162.9, 135.2, 134.7, 134.0, 130.2, 129.8, 128.2, 62.6, 14.0.

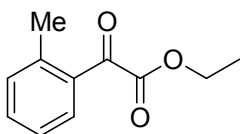

**Ethyl 2-oxo-2-(*o*-tolyl)acetate (3ma).**<sup>2</sup> Pale yellow oil (39 mg, 68% yield). <sup>1</sup>H NMR (400 MHz, CDCl<sub>3</sub>): δ 7.70 (d, *J* = 8.0 Hz, 1H), 7.51 (td, *J* = 1.2, 7.6 Hz, 1H), 7.33 (t, *J* = 8.0 Hz, 2H), 4.46 (q, *J* = 7.2 Hz, 2H), 2.61 (s, 3H), 1.43 (t, *J* = 7.2 Hz, 3H). <sup>13</sup>C NMR (100 MHz, CDCl<sub>3</sub>): δ 188.7, 164.6, 141.3, 133.6, 132.3, 132.2, 131.2, 125.9, 62.2, 21.4, 14.0.

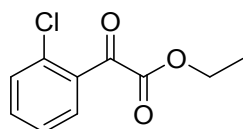

**Ethyl 2-(2-chlorophenyl)-2-oxoacetate (3na).**<sup>1</sup> Pale yellow oil (40 mg, 63% yield). <sup>1</sup>H NMR (400 MHz, CDCl<sub>3</sub>): δ 7.77 (dd, *J* = 2.0, 7.6 Hz, 1H), 7.54–7.50 (m, 1H), 7.45–7.38 (m, 2H), 4.45 (q, *J* = 7.2 Hz, 1H), 1.41 (t, *J* = 7.2 Hz, 3H). <sup>13</sup>C NMR (100 MHz, CDCl<sub>3</sub>): δ 186.5, 163.0, 134.2, 133.8, 133.3, 131.6, 130.5, 127.2, 62.8, 13.8.

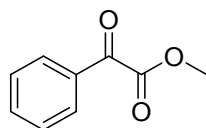

**Methyl 2-oxo-2-phenylacetate (3ab).**<sup>8</sup> Colorless oil (32 mg, 65% yield). <sup>1</sup>H NMR (400 MHz, CDCl<sub>3</sub>): δ 8.02–8.00 (m, 2H), 7.68–7.64 (m, 1H), 7.53 (t, *J* = 8.0 Hz, 2H), 3.98 (s, 3H). <sup>13</sup>C NMR (100 MHz, CDCl<sub>3</sub>): δ 186.0, 164.0, 135.0, 132.4, 130.0, 128.9, 52.7.

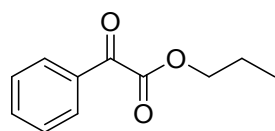

**Propyl 2-oxo-2-phenylacetate (3ac).**<sup>8</sup> Colorless oil (38 mg, 66% yield). <sup>1</sup>H NMR (400 MHz, CDCl<sub>3</sub>): δ 8.01–7.99 (m, 2H), 7.68–7.64 (m, 1H), 7.53–7.49 (m, 2H), 4.37 (t, *J* = 6.8 Hz, 2H), 1.82 (sextet, *J* = 7.6 Hz, 2H), 1.03 (t, *J* = 7.6 Hz, 3H). <sup>13</sup>C NMR (100 MHz, CDCl<sub>3</sub>): δ 186.5, 164.0, 134.8, 132.5, 129.9, 128.8, 67.7, 21.8, 10.2.

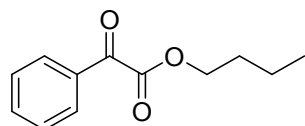

**Butyl 2-oxo-2-phenylacetate (3ad).**<sup>8</sup> Colorless oil (44 mg, 71% yield). <sup>1</sup>H NMR (400 MHz, CDCl<sub>3</sub>): δ 8.01–7.99 (m, 2H), 7.68–7.64 (m, 1H), 7.53 (t, *J* = 8.0 Hz, 2H), 4.41 (t, *J* = 6.8 Hz, 2H), 1.80 (quintet, *J* = 6.8 Hz, 2H), 1.50 (sextet, *J* = 7.6 Hz, 2H), 0.98 (t, *J* = 7.6 Hz, 3H). <sup>13</sup>C NMR (100 MHz, CDCl<sub>3</sub>): δ 186.4, 164.0, 134.8, 132.5, 129.9, 128.8, 66.0, 30.4, 19.0, 13.6.

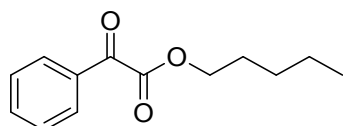

**Pentyl 2-oxo-2-phenylacetate (3ae).**<sup>8</sup> Colorless oil (45 mg, 69% yield). <sup>1</sup>H NMR (400 MHz, CDCl<sub>3</sub>): δ 8.01–7.99 (m, 2H), 7.68 (t, *J* = 7.6 Hz, 1H), 7.53 (t, *J* = 8.0 Hz, 2H), 4.40 (t, *J* = 7.2 Hz, 2H), 1.82 (quintet, *J* = 7.2 Hz, 2H), 1.42–1.33 (m, 4H), 0.93 (t, *J* = 7.2 Hz, 3H). <sup>13</sup>C NMR (100 MHz, CDCl<sub>3</sub>): δ 186.4, 164.0, 134.8, 132.5, 130.0, 128.8, 66.3, 28.1, 27.8, 22.2, 13.8.

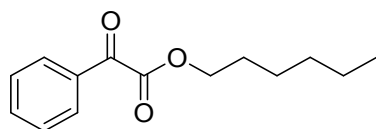

**Hexyl 2-oxo-2-phenylacetate (3af).**<sup>8</sup> Colorless oil (50 mg, 72% yield). <sup>1</sup>H NMR (400 MHz, CDCl<sub>3</sub>): δ 8.01 (dd, *J* = 0.8, 8.0 Hz, 2H), 7.67–7.63 (m, 1H), 7.53 (t, *J* = 7.6 Hz, 2H), 4.40 (t, *J* = 7.2 Hz, 2H), 1.81 (quintet, *J* = 7.2 Hz, 2H), 1.45–1.37 (m, 2H), 1.34–1.30 (m, 4H), 0.91 (t, *J* = 7.2 Hz, 3H). <sup>13</sup>C NMR (100 MHz, CDCl<sub>3</sub>): δ 186.4, 164.0, 134.8, 132.5, 130.0, 128.8, 66.3, 31.3, 28.4, 25.4, 22.4, 13.9.

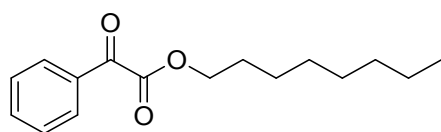

**Octyl 2-oxo-2-phenylacetate (3ag).**<sup>9</sup> Colorless oil (58 mg, 74% yield). <sup>1</sup>H

NMR (400 MHz, CDCl<sub>3</sub>):  $\delta$  8.01 (dd,  $J = 1.2, 8.0$  Hz, 2H), 7.68–7.63 (m, 1H), 7.53–7.49 (m, 2H), 4.40 (t,  $J = 7.2$  Hz, 2H), 1.81 (quintet,  $J = 7.2$  Hz, 1H), 1.44–1.27 (m, 12H), 0.89 (t,  $J = 7.2$  Hz, 3H). <sup>13</sup>C NMR (100 MHz, CDCl<sub>3</sub>):  $\delta$  186.4, 163.9, 134.8, 132.5, 129.9, 128.8, 66.3, 31.7, 29.0, 28.4, 25.7, 22.5, 14.0.

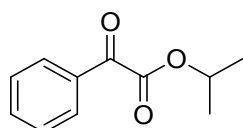

**iso-Propyl 2-oxo-2-phenylacetate (3ah).**<sup>8</sup> Colorless oil (28 mg, 48% yield). <sup>1</sup>H NMR (400 MHz, CDCl<sub>3</sub>):  $\delta$  8.00–7.98 (m, 2H), 7.68–7.73 (m, 1H), 7.53–7.49 (m, 2H), 5.37 (septet,  $J = 6.4$  Hz, 1H), 1.42 (d,  $J = 6.4$  Hz, 6H). <sup>13</sup>C NMR (100 MHz, CDCl<sub>3</sub>):  $\delta$  186.7, 163.6, 134.7, 132.5, 129.9, 128.8, 70.6, 21.7

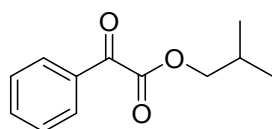

**iso-Butyl 2-oxo-2-phenylacetate (3ai).**<sup>8</sup> Colorless oil (47 mg, 77% yield). <sup>1</sup>H NMR (400 MHz, CDCl<sub>3</sub>):  $\delta$  7.93–7.90 (m, 2H), 7.59 (t,  $J = 7.6$  Hz, 1H), 7.45 (t,  $J = 7.6$  Hz, 2H), 4.10 (d,  $J = 6.8$  Hz, 2H), 2.05 (septet,  $J = 6.8$  Hz, 1H), 0.93 (d,  $J = 6.8$  Hz, 6H). <sup>13</sup>C NMR (100 MHz, CDCl<sub>3</sub>):  $\delta$  186.5, 164.0, 134.8, 132.5, 129.9, 128.9, 72.0, 27.7, 18.9.

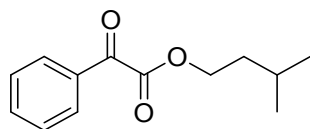

**iso-Pentyl 2-oxo-2-phenylacetate (3aj).**<sup>8</sup> Colorless oil (50 mg, 76% yield). <sup>1</sup>H NMR (400 MHz, DMSO-*d*<sub>6</sub>):  $\delta$  7.95–7.93 (m, 2H), 7.80 (t,  $J = 7.6$  Hz, 2H),



7.63 (t,  $J = 7.6$  Hz, 2H), 4.38 (t,  $J = 6.8$  Hz, 2H), 1.72 (quintet,  $J = 6.4$  Hz, 2H), 1.33–1.28 (m, 4H), 0.87 (t,  $J = 6.8$  Hz, 3H).  $^{13}\text{C}$  NMR (100 MHz,  $\text{DMSO-}d_6$ ):  $\delta$  187.2, 164.2, 135.9, 132.1, 130.1, 129.7, 66.5, 27.9, 27.8, 22.0, 14.2.

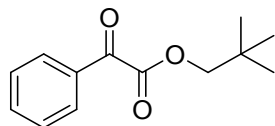

**Neopentyl 2-oxo-2-phenylacetate (3ak).**<sup>10</sup> Colorless oil (47 mg, 71% yield).  $^1\text{H}$  NMR (400 MHz,  $\text{CDCl}_3$ ):  $\delta$  8.01–7.99 (m, 2H), 7.68–7.64 (m, 1H), 7.53 (t,  $J = 8.0$  Hz, 2H), 4.10 (s, 2H), 1.01 (s, 9H).  $^{13}\text{C}$  NMR (100 MHz,  $\text{CDCl}_3$ ):  $\delta$  186.5, 164.1, 134.8, 132.5, 129.9, 128.9, 75.2, 31.5, 26.3.

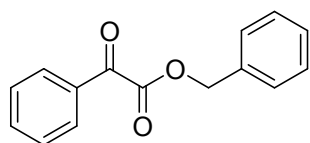

**Benzyl 2-oxo-2-phenylacetate (3al).**<sup>11</sup> Colorless oil (43 mg, 60% yield).  $^1\text{H}$  NMR (400 MHz,  $\text{CDCl}_3$ ):  $\delta$  7.96–7.94 (m, 2H), 7.64 (t,  $J = 7.6$  Hz, 1H), 7.48–7.42 (m, 4H), 7.40–7.34 (m, 3H), 5.40 (s, 2H).  $^{13}\text{C}$  NMR (100 MHz,  $\text{CDCl}_3$ ):  $\delta$  186.0, 163.6, 134.9, 134.5, 132.4, 130.0, 128.9, 128.8, 128.7, 128.6, 67.7.

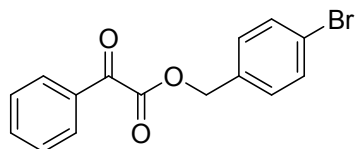

**4-Bromobenzyl 2-oxo-2-phenylacetate (3am).**<sup>11</sup> Yellow solid (56 mg, 59% yield).  $^1\text{H}$  NMR (400 MHz,  $\text{CDCl}_3$ ):  $\delta$  7.97 (dd,  $J = 0.8, 8.0$  Hz, 2H), 7.67–7.63 (m, 1H), 7.53–7.47 (m, 4H), 7.33 (d,  $J = 8.4$  Hz, 2H), 5.35 (s, 2H).  $^{13}\text{C}$  NMR (100 MHz,  $\text{CDCl}_3$ ):  $\delta$  185.7, 163.4, 135.0, 133.5, 132.3, 131.9, 130.2, 130.0, 128.9, 122.9, 66.9.

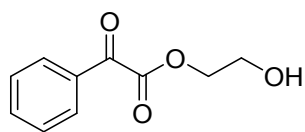

**2-Hydroxyethyl 2-oxo-2-phenylacetate (3an).** Pale yellow oil (36 mg, 62% yield).  $^1\text{H}$  NMR (400 MHz,  $\text{DMSO-}d_6$ ):  $\delta$  7.99–7.97 (m, 2H), 7.81–7.76 (m, 1H), 7.64–7.60 (m, 2H), 4.42 (t,  $J = 4.8$  Hz, 2H), 3.71 (t,  $J = 4.8$  Hz, 2H).  $^{13}\text{C}$  NMR (100 MHz,  $\text{DMSO-}d_6$ ):  $\delta$  187.3, 164.3, 135.9, 132.2, 130.2, 129.7, 68.1, 59.1. HRMS (ESI) calcd for  $\text{C}_{10}\text{H}_{11}\text{O}_4$  ( $\text{M}+\text{H}$ ) $^+$ : 195.0652; Found: 195.0643.

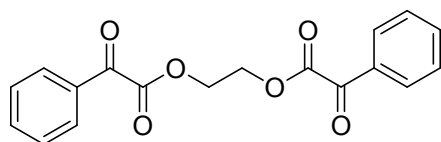

**Ethane-1,2-diyl bis(2-oxo-2-phenylacetate) (3ao).** Pale yellow oil (28 mg, 29% yield).  $^1\text{H}$  NMR (400 MHz,  $\text{CDCl}_3$ ):  $\delta$  8.02–8.00 (m, 4H), 7.67–7.63 (m, 2H), 7.51 (t,  $J = 7.6$  Hz, 4H), 4.74 (s, 4H).  $^{13}\text{C}$  NMR (100 MHz,  $\text{CDCl}_3$ ):  $\delta$  185.5, 163.2, 135.1, 132.1, 130.1, 128.9, 62.9. HRMS (ESI) calcd for  $\text{C}_{18}\text{H}_{15}\text{O}_6$  ( $\text{M}+\text{H}$ ) $^+$ : 327.0863; Found: 327.0866.

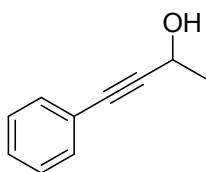

**4-Phenylbut-3-yn-2-ol (4aa).**<sup>12</sup> Colorless oil (18.1 mg, 63% yield).  $^1\text{H}$  NMR (400 MHz,  $\text{CDCl}_3$ ):  $\delta$  7.45–7.43 (m, 2H), 7.33–7.31 (m, 3H), 4.80–4.74 (m, 1H), 1.99 (d,  $J = 5.3$  Hz, 1H), 1.57 (d,  $J = 6.6$  Hz, 3H).  $^{13}\text{C}$  NMR (100 MHz,  $\text{CDCl}_3$ ):  $\delta$  131.6, 128.3, 128.2, 122.5, 90.9, 84.0, 58.8, 24.4.

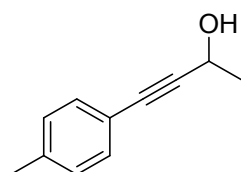

**4-(*p*-Tolyl)but-3-yn-2-ol (4ba).**<sup>13</sup> Pale yellow oil (16.3 mg, 51% yield). <sup>1</sup>H NMR (400 MHz, CDCl<sub>3</sub>): δ 7.32 (d, *J* = 8.0 Hz, 2H), 7.11 (d, *J* = 7.9 Hz, 2H), 4.77 (q, *J* = 6.5 Hz, 1H), 2.34 (s, 3H), 2.01 (s, 1H), 1.55 (d, *J* = 6.6 Hz, 3H). <sup>13</sup>C NMR (100 MHz, CDCl<sub>3</sub>): δ 138.4, 131.5, 129.0, 119.5, 90.2, 84.1, 58.8, 24.3, 21.4.

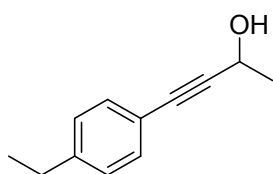

**4-(4-Ethylphenyl)but-3-yn-2-ol (4ca).** Pale yellow oil (17 mg, 49% yield). <sup>1</sup>H NMR (400 MHz, CDCl<sub>3</sub>): δ 7.35 (d, *J* = 8.1 Hz, 2H), 7.13 (d, *J* = 8.1 Hz, 2H), 4.77 (q, *J* = 6.5 Hz, 1H), 2.66 (q, *J* = 7.6 Hz, 2H), 2.05 (s, 1H), 1.55 (d, *J* = 6.5 Hz, 3H), 1.23 (t, *J* = 7.6 Hz, 3H). <sup>13</sup>C NMR (100 MHz, CDCl<sub>3</sub>): δ 144.7, 131.6, 127.8, 119.7, 90.3, 84.1, 58.8, 28.7, 24.4, 15.2. HRMS (ESI) calcd for C<sub>12</sub>H<sub>15</sub>O (M+H)<sup>+</sup>: 175.1117; Found: 175.1118.

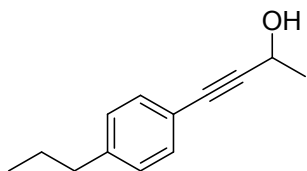

**4-(4-Propylphenyl)but-3-yn-2-ol (4da).** Pale yellow oil (20 mg, 53% yield). <sup>1</sup>H NMR (400 MHz, CDCl<sub>3</sub>): δ 7.35 (d, *J* = 8.0 Hz, 2H), 7.13 (d, *J* = 8.0 Hz, 2H), 4.79–4.72 (m 1H), 2.60 (t, *J* = 7.4 Hz, 2H), 1.95–1.94 (m, 1H), 1.62–1.61 (m, 2H), 1.56 (d, *J* = 6.6 Hz, 3H), 0.95 (t, *J* = 7.3 Hz, 3H). <sup>13</sup>C NMR (100 MHz, CDCl<sub>3</sub>): δ 143.2, 131.5, 128.4, 119.7, 90.2, 84.1, 58.9, 37.8, 24.4, 24.2, 13.6. HRMS (ESI) calcd for C<sub>12</sub>H<sub>15</sub>O (M+H)<sup>+</sup>: 189.1274; Found: 189.1274.

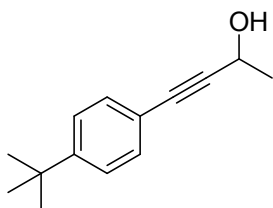

**4-(4-(*tert*-Butyl)phenyl)but-3-yn-2-ol (4ea).**<sup>14</sup> Pale yellow oil (24.6 mg, 61% yield).

<sup>1</sup>H NMR (400 MHz, CDCl<sub>3</sub>):  $\delta$  7.37–7.35 (m, 2H), 7.33–7.30 (m, 2H), 4.77 (q,  $J$  = 6.5 Hz, 1H), 2.01 (s, 1H), 1.55 (d,  $J$  = 6.5 Hz, 3H), 1.30 (s, 9H). <sup>13</sup>C NMR (100 MHz, CDCl<sub>3</sub>):  $\delta$  151.1, 131.3, 125.2, 119.5, 90.2, 84.1, 58.9, 34.7, 31.1, 24.4.

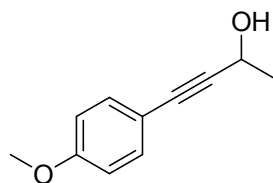

**4-(4-Methoxyphenyl)but-3-yn-2-ol (4fa).**<sup>13</sup> Pale yellow oil (10.5 mg, 30% yield). <sup>1</sup>H

NMR (400 MHz, DMSO-*d*<sub>6</sub>):  $\delta$  7.33 (d,  $J$  = 8.8 Hz, 2H), 6.92 (d,  $J$  = 8.8 Hz, 2H), 5.37 (d,  $J$  = 5.3 Hz, 1H), 4.58–4.52 (m, 1H), 3.75 (s, 3H), 1.36 (d,  $J$  = 6.5 Hz, 2H). <sup>13</sup>C NMR (100 MHz, DMSO-*d*<sub>6</sub>):  $\delta$  159.6, 133.1, 114.9, 114.6, 92.2, 82.5, 57.1, 55.6, 25.1.

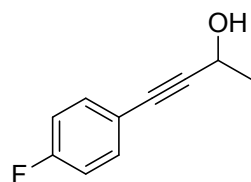

**4-(4-Fluorophenyl)but-3-yn-2-ol (4ga).**<sup>13</sup> Pale yellow oil (18.6 mg, 57% yield). <sup>1</sup>H

NMR (400 MHz, CDCl<sub>3</sub>):  $\delta$  7.43–7.38 (m, 2H), 7.03–6.97 (m, 2H), 4.78–4.72 (m, 1H), 2.01 (d,  $J$  = 5.1 Hz, 1H), 1.56 (d,  $J$  = 6.6 Hz, 3H), 1.31 (s, 9H). <sup>13</sup>C NMR (100 MHz, CDCl<sub>3</sub>):  $\delta$  163.7 ( $J$  = 248.0 Hz), 133.5 ( $J$  = 8.3 Hz), 118.6 ( $J$  = 3.5 Hz), 115.6 ( $J$  = 21.9 Hz), 90.6, 82.9, 58.8, 24.3.

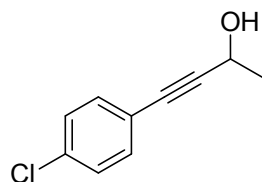

**4-(4-Chlorophenyl)but-3-yn-2-ol (4ha).**<sup>15</sup> Pale yellow oil (22 mg, 61% yield). <sup>1</sup>H

NMR (400 MHz, CDCl<sub>3</sub>):  $\delta$  7.36–7.32 (m, 2H), 7.29–7.27 (m, 2H), 4.78–4.72 (m, 1H), 2.12 (d,  $J$  = 5.1 Hz, 1H), 1.56 (d,  $J$  = 6.6 Hz, 3H). <sup>13</sup>C NMR (100 MHz, CDCl<sub>3</sub>):

$\delta$  134.4, 132.8, 128.6, 121.0, 91.9, 82.9, 58.7, 24.3.

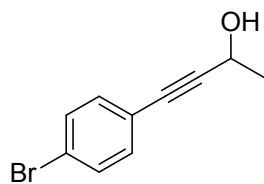

**4-(4-Bromophenyl)but-3-yn-2-ol (4ia).**<sup>13</sup> Pale yellow oil (26.9 mg, 60% yield). <sup>1</sup>H NMR (400 MHz, DMSO-*d*<sub>6</sub>):  $\delta$  7.56–7.53 (m, 2H), 7.35–7.31 (m, 2H), 5.47 (d, *J* = 5.2 Hz, 1H), 4.60–4.53 (m, 1H), 1.37 (d, *J* = 6.6 Hz, 3H). <sup>13</sup>C NMR (100 MHz, DMSO-*d*<sub>6</sub>):  $\delta$  133.5, 132.1, 122.2, 122.1, 95.1, 81.5, 57.1, 24.9.

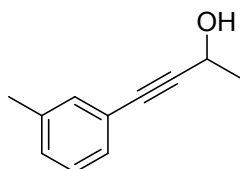

**4-(*m*-Tolyl)but-3-yn-2-ol (4ja).**<sup>13</sup> Pale yellow oil (15.5 mg, 48% yield). <sup>1</sup>H NMR (400 MHz, CDCl<sub>3</sub>):  $\delta$  7.25–7.21 (m, 2H), 7.20–7.16(m, 1H), 7.13–7.11(m, 1H), 4.77 (q, *J* = 6.5 Hz, 1H), 2.31 (s, 3H), 2.03 (s, 1H), 1.55 (d, *J* = 6.6 Hz, 3H). <sup>13</sup>C NMR (100 MHz, CDCl<sub>3</sub>):  $\delta$  137.9, 132.2, 129.2, 128.7, 128.1, 122.3, 90.6, 84.1, 58.8, 24.4, 21.1.

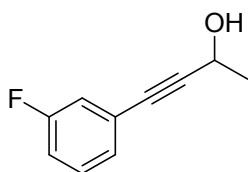

**4-(3-Fluorophenyl)but-3-yn-2-ol (4ka).**<sup>13</sup> Pale yellow oil (20.3 mg, 62% yield). <sup>1</sup>H NMR (400 MHz, CDCl<sub>3</sub>):  $\delta$  7.30–7.26 (m, 1H), 7.21–7.19(m, 1H), 7.14–7.11(m, 1H), 7.05–7.00(m, 1H), 4.79–4.72 (m, 1H), 2.05 (s, 1H), 1.57 (d, *J* = 6.6 Hz, 3H). <sup>13</sup>C NMR (100 MHz, CDCl<sub>3</sub>):  $\delta$  163.5 (*J* = 245.0 Hz), 129.8 (*J* = 8.5 Hz), 127.5 (*J* = 3.0 Hz), 124.5 (*J* = 9.3 Hz), 118.5 (*J* = 22.7 Hz), 115.8 (*J* = 21.0 Hz), 91.8, 82.8 (*J* = 3.4 Hz), 58.7, 24.2.

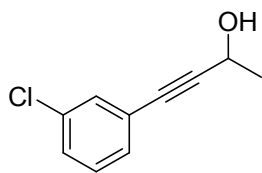

**4-(3-Chlorophenyl)but-3-yn-2-ol (4la).**<sup>14</sup> Pale yellow oil (22.3 mg, 62% yield). <sup>1</sup>H NMR (400 MHz, CDCl<sub>3</sub>): δ 7.41–7.40 (m, 1H), 7.30–7.28 (m, 2H), 7.24–7.20 (m, 1H), 4.75–4.73 (m, 1H), 2.00 (s, 1H), 1.55 (d, *J* = 6.6 Hz, 3H). <sup>13</sup>C NMR (100 MHz, CDCl<sub>3</sub>): δ 134.1, 131.5, 129.7, 129.4, 128.6, 124.3, 92.1, 82.6, 58.7, 24.2.

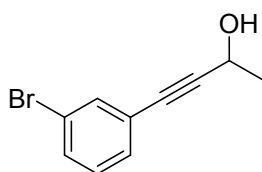

**4-(3-Bromophenyl)but-3-yn-2-ol (4ma).**<sup>15</sup> Pale yellow oil (28.6 mg, 64% yield). <sup>1</sup>H NMR (400 MHz, CDCl<sub>3</sub>): δ 7.58 (t, *J* = 1.6 Hz, 3H), 7.45 (dq, *J* = 0.96, 8.0 Hz, 1H), 7.35 (dt, *J* = 1.1, 7.7 Hz, 1H), 7.18 (t, *J* = 7.8 Hz, 1H), 4.78–4.72 (m, 1H), 2.28 (s, 1H), 1.56 (d, *J* = 6.6 Hz, 3H). <sup>13</sup>C NMR (100 MHz, CDCl<sub>3</sub>): δ 134.4, 131.5, 130.1, 129.7, 124.6, 122.0, 92.3, 82.5, 58.7, 24.2.

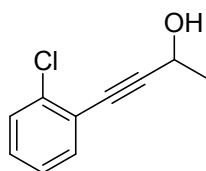

**4-(2-Chlorophenyl)but-3-yn-2-ol (4na).**<sup>16</sup> Pale yellow oil (22.3 mg, 62% yield). <sup>1</sup>H NMR (400 MHz, CDCl<sub>3</sub>): δ 7.47 (dd, *J* = 1.8, 7.4 Hz, 1H), 7.40 (dd, *J* = 1.3, 7.9 Hz, 1H), 7.25–7.18 (m, 2H), 4.84–4.77 (m, 1H), 2.01 (d, *J* = 5.2 Hz, 1H), 1.59 (d, *J* = 6.6 Hz, 3H). <sup>13</sup>C NMR (100 MHz, CDCl<sub>3</sub>): δ 135.9, 133.3, 129.4, 129.2, 126.4, 122.5, 96.2, 80.8, 58.9, 24.2.

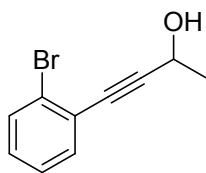

**4-(2-Bromophenyl)but-3-yn-2-ol (4oa).**<sup>15</sup> Pale yellow oil (26.4 mg, 59% yield). <sup>1</sup>H NMR (400 MHz, CDCl<sub>3</sub>): δ 7.59 (dd, *J* = 1.0, 8.0 Hz, 1H), 7.40 (dd, *J* = 1.6, 7.6 Hz, 1H) 7.27–7.23(m, 1H), 7.18–7.14 (m, 1H), 4.84–4.77 (m, 1H), 2.18 (d, *J* = 5.2 Hz, 1H), 1.60 (d, *J* = 6.6 Hz, 3H). <sup>13</sup>C NMR (100 MHz, CDCl<sub>3</sub>): δ 133.3, 132.3, 129.5, 126.9, 125.5, 124.7, 95.6, 82.6, 58.9, 24.2.

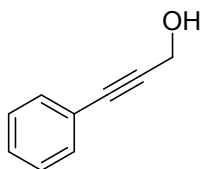

**3-Phenylprop-2-yn-1-ol (4ab).**<sup>12</sup> Colorless oil (10.3 mg, 39% yield). <sup>1</sup>H NMR (400 MHz, CDCl<sub>3</sub>): δ 7.46–7.44 (m, 2H), 7.34–7.31 (m, 3H), 4.51 (d, *J* = 4.4 Hz, 1H), 1.77 (s, 1H). <sup>13</sup>C NMR (100 MHz, CDCl<sub>3</sub>): δ 131.6, 128.4, 128.3, 122.5, 87.1, 85.7, 51.6.

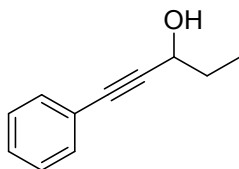

**1-Phenylpent-1-yn-3-ol (4ac).**<sup>17</sup> Pale yellow oil (16.4 mg, 51% yield). <sup>1</sup>H NMR (400 MHz, CDCl<sub>3</sub>): δ 7.45–7.43 (m, 2H), 7.34–7.30 (m, 3H), 4.59 (q, *J* = 6.2 Hz, 1H), 2.01–2.00 (m, 1H), 1.87–1.80 (m, 2H), 1.11 (t, *J* = 7.4 Hz, 3H). <sup>13</sup>C NMR (100 MHz, CDCl<sub>3</sub>): δ 131.6, 128.3, 128.2, 122.6, 89.9, 84.9, 64.2, 30.9, 9.4.

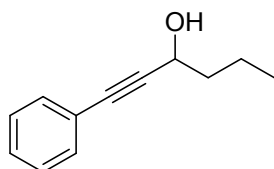

**1-Phenylhex-1-yn-3-ol (4ad).**<sup>18</sup> Pale yellow oil (12.5 mg, 36% yield). <sup>1</sup>H NMR (400 MHz, CDCl<sub>3</sub>): δ 7.45–7.43 (m, 2H), 7.33–7.31 (m, 3H), 4.64 (q, *J* = 6.4 Hz, 1H), 1.93

(d,  $J = 6.4$  Hz, 1H), 1.83–1.77 (m, 2H), 1.59–1.52 (m, 2H), 1.02 (t,  $J = 7.3$  Hz, 3H).  
 $^{13}\text{C}$  NMR (100 MHz,  $\text{CDCl}_3$ ):  $\delta$  131.6, 128.3, 128.2, 122.6, 90.2, 84.2, 62.7, 40.0, 18.4, 13.7.

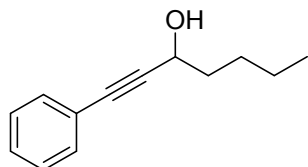

**1-Phenylhept-1-yn-3-ol (4ae).**<sup>19</sup> Pale yellow oil (11.6 mg, 31% yield).  $^1\text{H}$  NMR (400 MHz,  $\text{CDCl}_3$ ):  $\delta$  7.45–7.43 (m, 2H), 7.33–7.31 (m, 3H), 4.63 (q,  $J = 6.4$  Hz, 1H), 1.93–1.91 (m, 1H), 1.85–1.79 (m, 2H), 1.56–1.48 (m, 2H), 1.45–1.38 (m, 2H), 0.97 (t,  $J = 7.2$  Hz, 3H).  $^{13}\text{C}$  NMR (100 MHz,  $\text{CDCl}_3$ ):  $\delta$  131.6, 128.3, 128.2, 122.7, 90.2, 84.8, 63.0, 37.6, 27.3, 22.3, 13.9.

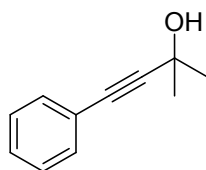

**2-Methyl-4-phenylbut-3-yn-2-ol (4af).**<sup>20</sup> Pale yellow oil (9.6 mg, 30% yield).  $^1\text{H}$  NMR (400 MHz,  $\text{CDCl}_3$ ):  $\delta$  7.44–7.41 (m, 2H), 7.32–7.29 (m, 3H), 2.13 (s, 1H), 1.63 (s, 6H).  $^{13}\text{C}$  NMR (100 MHz,  $\text{CDCl}_3$ ):  $\delta$  131.6, 128.2, 122.7, 93.7, 82.1, 65.6, 31.4.

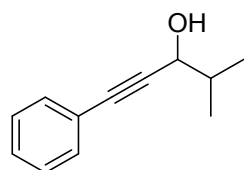

**4-Methyl-1-phenylpent-1-yn-3-ol (4ag).**<sup>21</sup> Pale yellow oil (12.1 mg, 35% yield).  $^1\text{H}$  NMR (400 MHz,  $\text{CDCl}_3$ ):  $\delta$  7.46–7.43 (m, 2H), 7.32–7.30 (m, 3H), 4.42 (t,  $J = 5.6$  Hz, 1H), 1.99–1.96 (m, 1H), 1.31 (s, 1H), 1.10 (d,  $J = 6.7$  Hz, 3H), 1.08 (d,  $J = 6.8$  Hz, 3H).  $^{13}\text{C}$  NMR (100 MHz,  $\text{CDCl}_3$ ):  $\delta$  131.6, 128.3, 128.2, 122.7, 88.9, 85.5, 68.4, 34.7, 18.1, 17.5.

**References:**



1. H. Shimizu and M. Murakami, *Chem. Commun.*, 2007, 2855.
2. M. Hayashi and S. Nakamura, *Angew. Chem., Int. Ed.*, 2011, **50**, 2249.
3. J. W. Epstein, H. J. Brabander, W. J. Fanshawe, C. M. Hofmann, T. C. McKenzie, S. R. Safir, A. C. Osterberg, D. B. Cosulich and F. M. Love, *J. Med. Chem.*, 1981, **24**, 481.
4. J. Sławiński, A. Grzonek, B. Żolnowska and A. Kawiak, *Molecules*, 2016, **21**,41.
5. C. Feng and T.-P. Loh, *Angew. Chem., Int. Ed.*, 2013, **52**, 12414.
6. R. M. Laha, S. Khamarui, S. K. Manna and D. K. Maiti, *Org. Lett.*, 2016, **18**, 144.
7. S. Song, P. Lu, H. Liu, S.-H. Cai, C. Feng and T.-P. Loh, *Org. Lett.*, 2017, **19**, 2869.
8. S. K. Alamsett and G. Sekar, *Chem. Commun.*, 2010, **46**, 7235.
9. T. Shao, X. Fang, J. Zhou, C. Jin, X. Yang and F. Wu, *Synlett*, 2017, **28**, 2018.
10. A. G. Merzlikine, S. V. Voskresensky, E. O. Danilov, M. A. J. Rodgers and D. C. Neckers, *J. Am. Chem. Soc.*, 2002, **124**, 14532.
11. C. Zhang, P. Feng and N. Jiao, *J. Am. Chem. Soc.*, 2013, **135**, 15257.
12. Z.-Y. Tian, S.-M. Wang, S.-J. Jia, H.-X. Song and C.-P. Zhang, *Org. Lett.*, 2017, **19**, 5454.
13. W. Kouichi, M. Yusuke, O. Masataka, Z. Biao, T. Hiroaki and K. Motoi, *Org. Lett.*, 2018, **20**, 5448.
14. F. Wang, Z. Qi, J. Sun, X. Zhang and X. Li, *Org. Lett.*, 2013, **15**, 6290.
15. T. Schubert, W. Hummel, M.-R. Kula and M. Müller, *Eur. J. Org. Chem.*, 2001, 4181.
16. G. Ernouf, J.-L. Brayer, B. Folléas, J.-P. Demoute, C. Meyer and J. Cossy, *J. Org. Chem.*, 2017, **82**, 3965.
17. R. K. Everett and J. P. Wolfe, *Org. Lett.*, 2013, **15**, 2926.
18. M. N. Pennell, M. P. Kyle, S. M. Gibson, L. Male, P. G. Turner, R. S. Grainger and T. D. Sheppard, *Adv. Synth. Catal.*, 2016, **358**, 1519.
19. A. B. Smith III, R. Tong, W.-S. Kim and W. A. Maio, *Angew. Chem., Int. Ed.*, 2011, **50**, 8904.
20. S. Fu, N.-Y. Chen, X Liu, Z Shao, S.-P. Luo and Q. Liu, *J. Am. Chem. Soc.*, 2016, *138*, 8588.
21. F. Schömberg, Y. Zi and I. Vilotijevic, *Chem. Commun.*, 2018, **54**, 3266.

### **13. <sup>1</sup>H and <sup>13</sup>C NMR spectra of bromoalkynes (1b–1n) and all products**

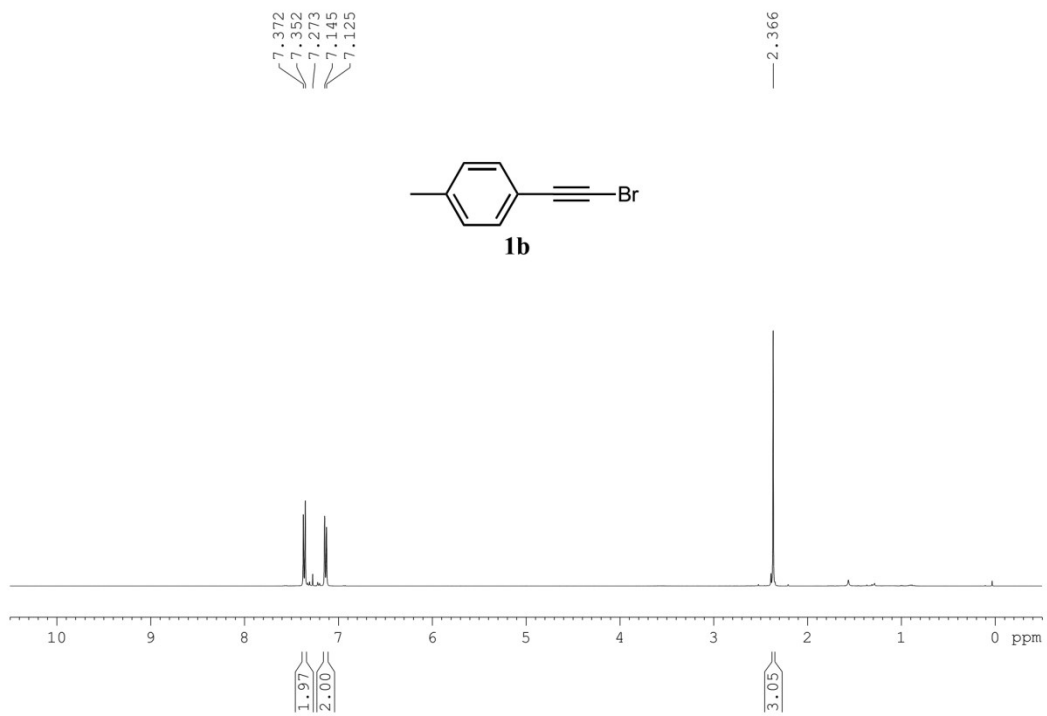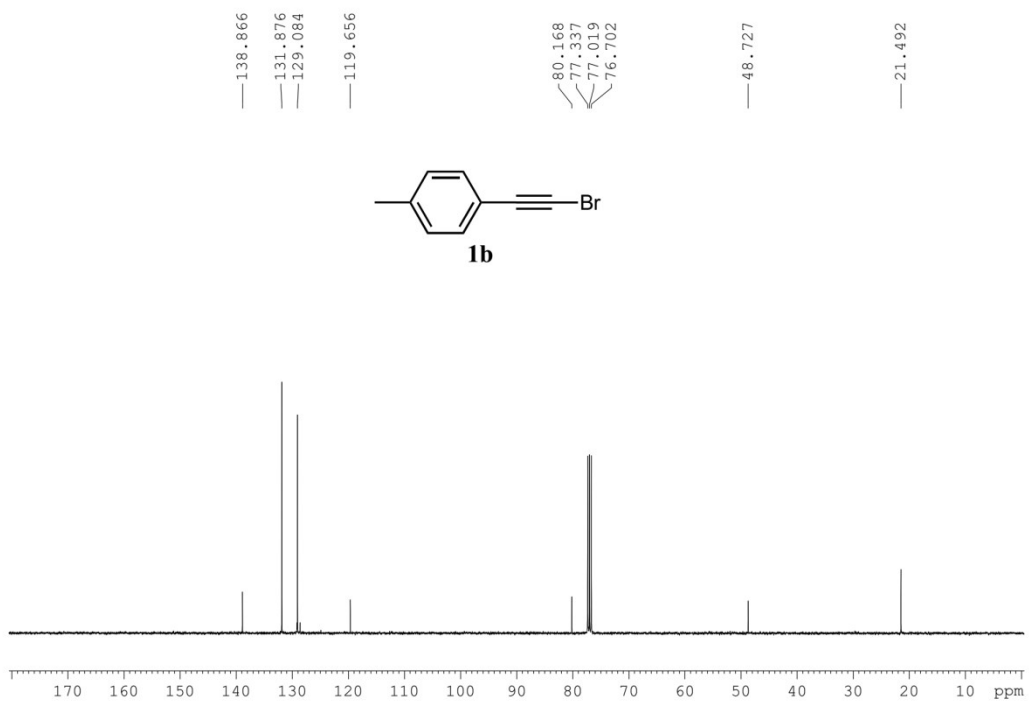

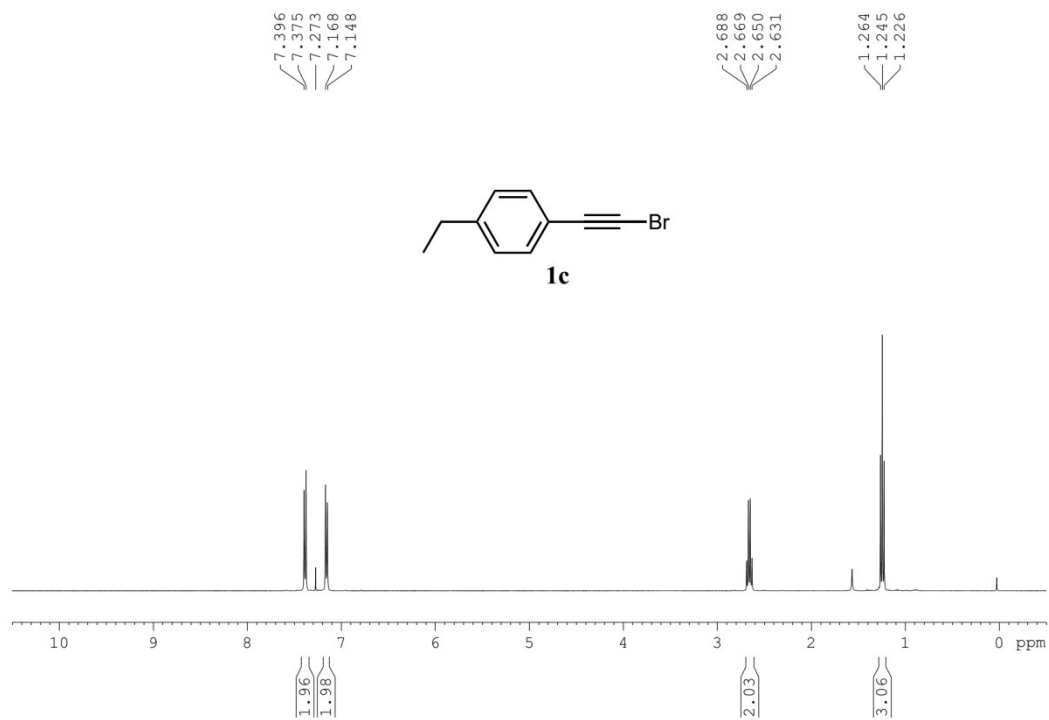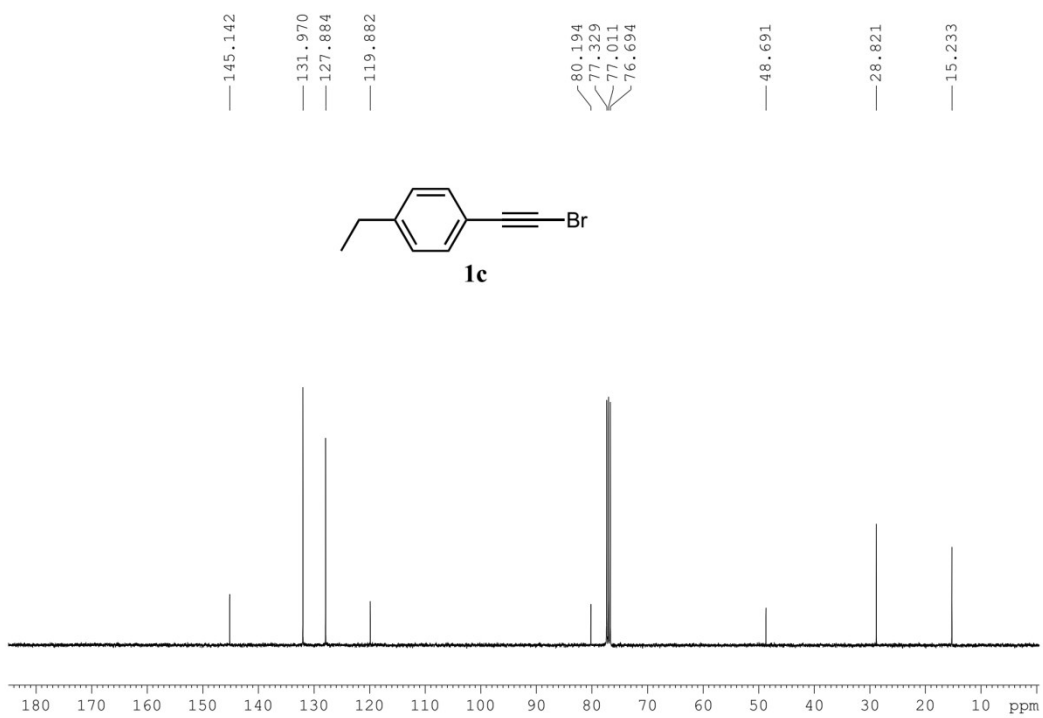

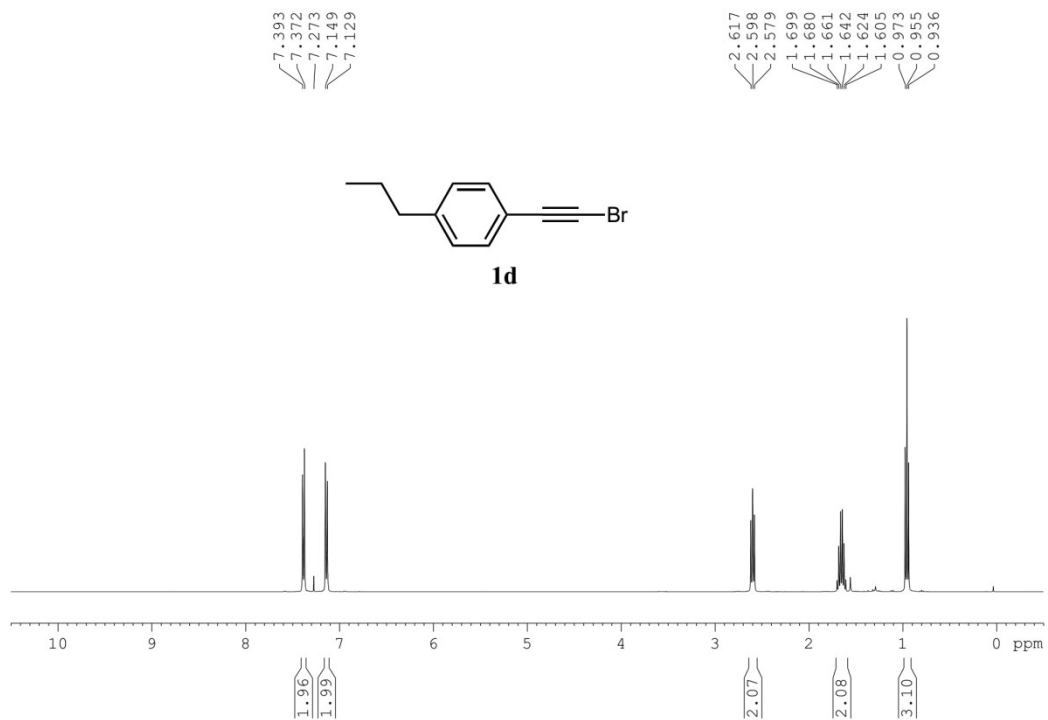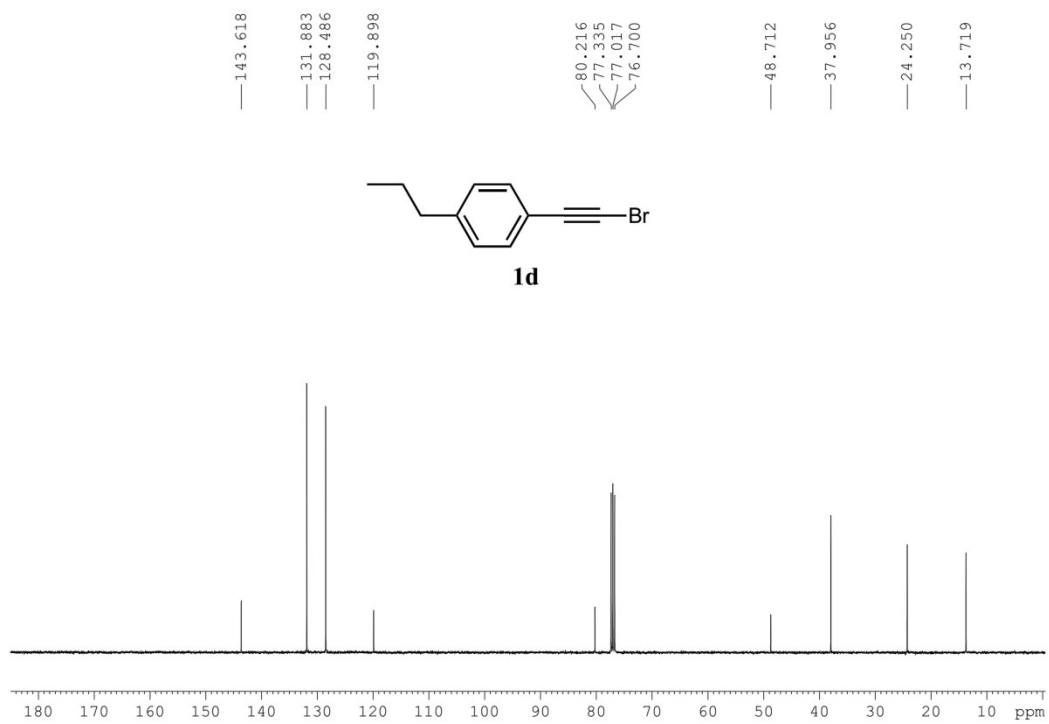

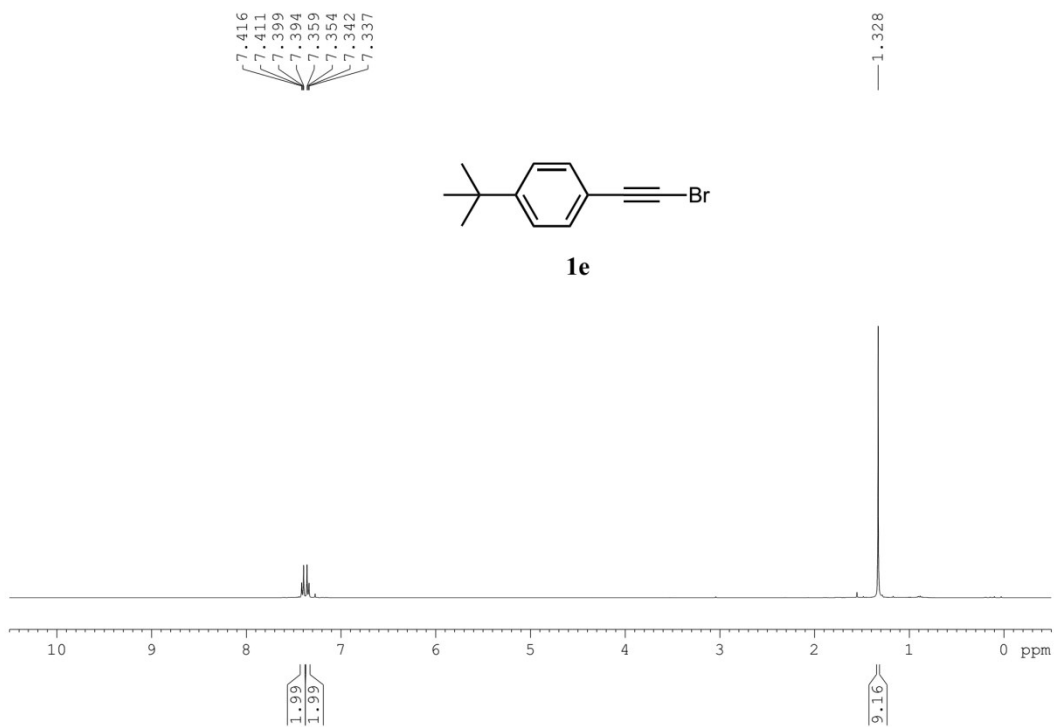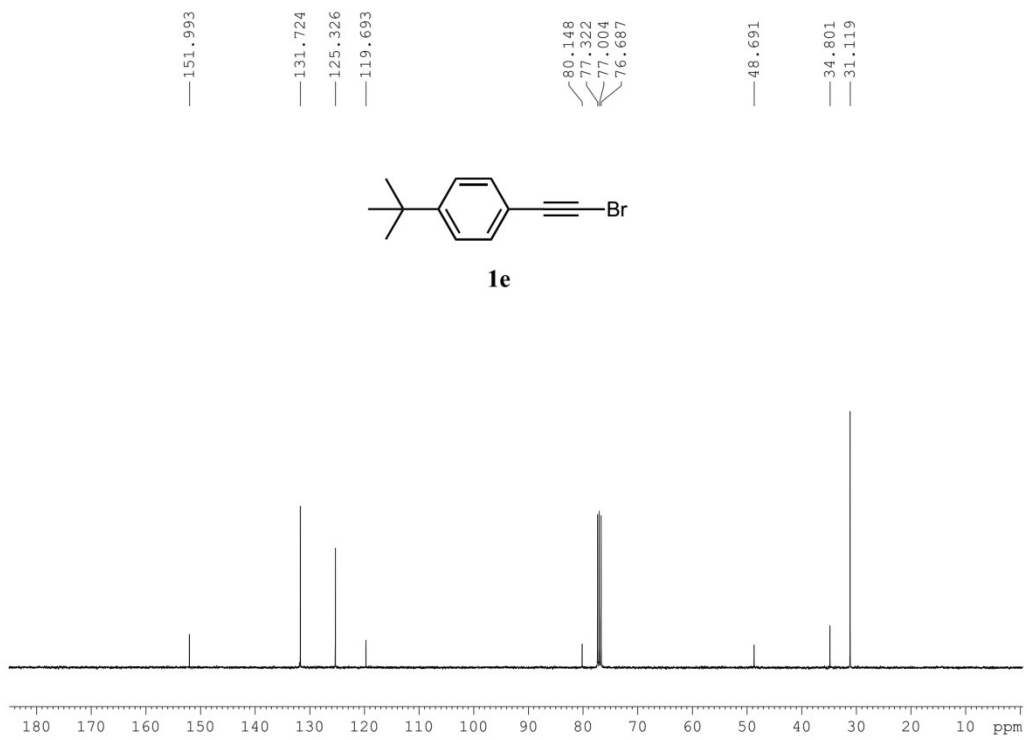

7.469  
7.462  
7.457  
7.449  
7.440  
7.432  
7.426  
7.420  
7.274  
7.048  
7.041  
7.036  
7.019  
7.003  
6.998  
6.991

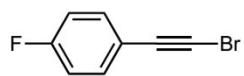

**1f**

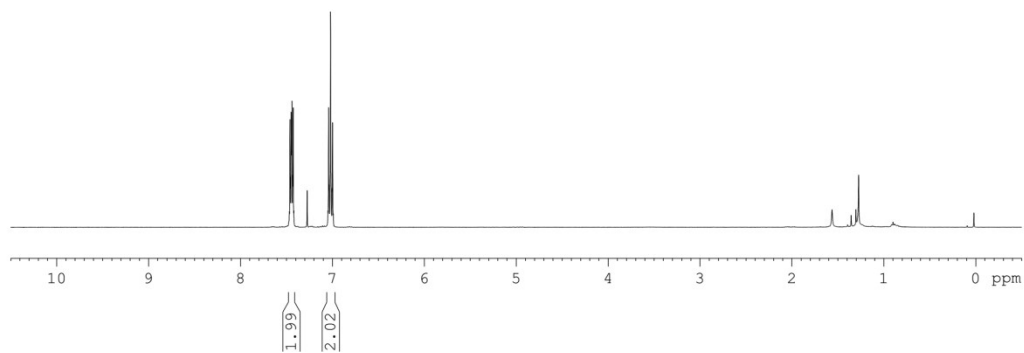

163.943  
161.456

133.961  
133.875

118.810  
118.774  
118.758  
115.537

79.006  
77.315  
76.998  
76.680

49.514

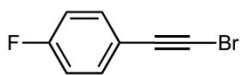

**1f**

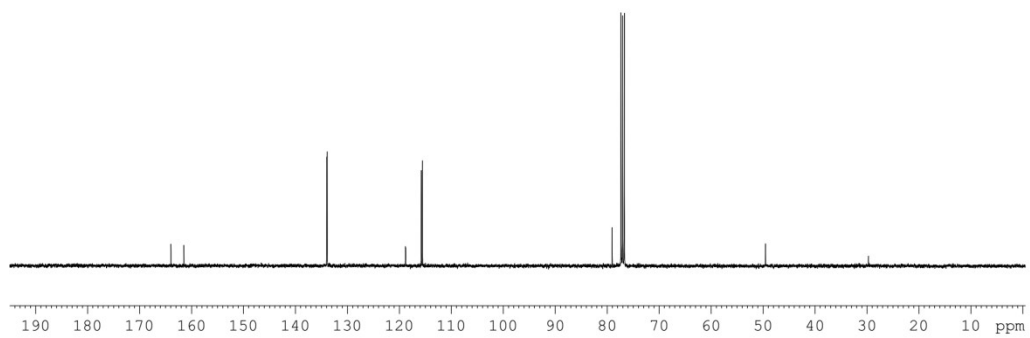

7.403  
7.397  
7.392  
7.381  
7.376  
7.370  
7.315  
7.310  
7.305  
7.293  
7.288  
7.283  
7.273

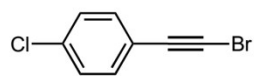

**1g**

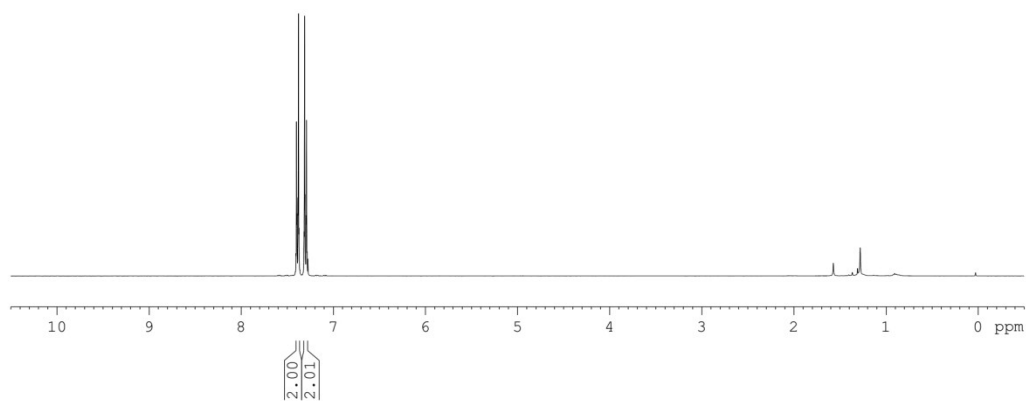

134.805  
133.207  
128.701  
121.187

79.001  
77.334  
77.016  
76.699

51.006

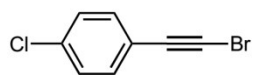

**1g**

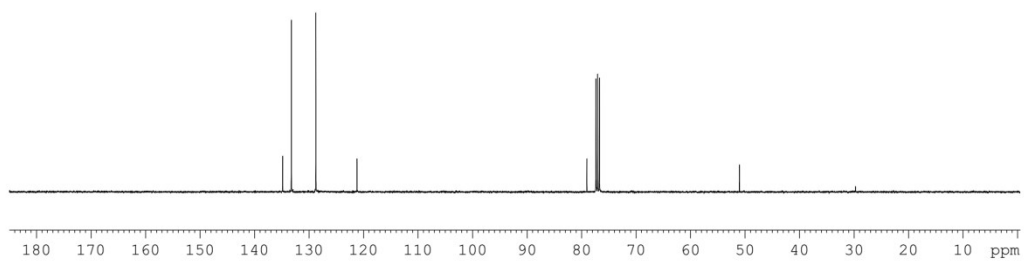

7.475  
7.470  
7.465  
7.453  
7.449  
7.444  
7.332  
7.327  
7.322  
7.310  
7.305  
7.300  
7.273

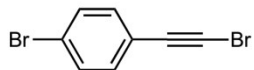

**1h**

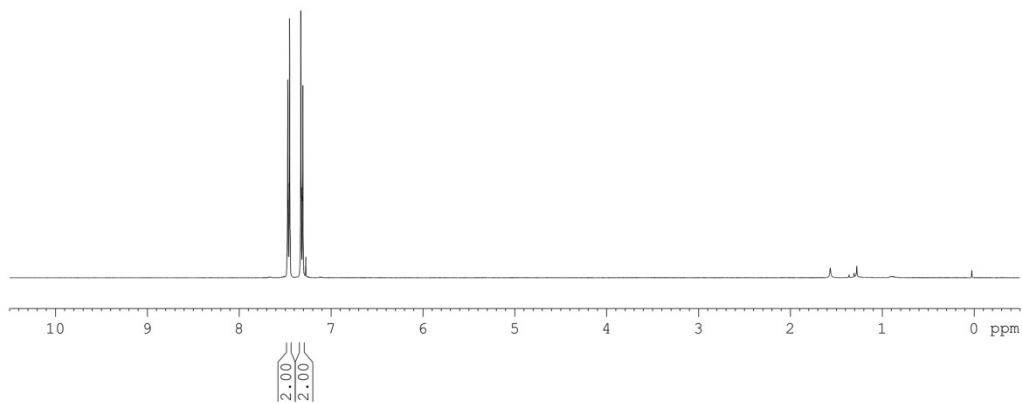

133.404  
131.629  
123.026  
121.653

79.069  
77.337  
77.019  
76.702

51.219

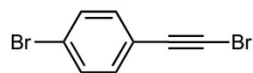

**1h**

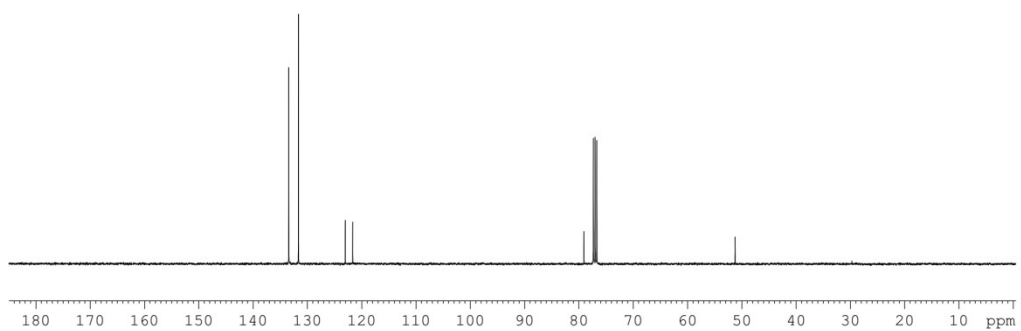



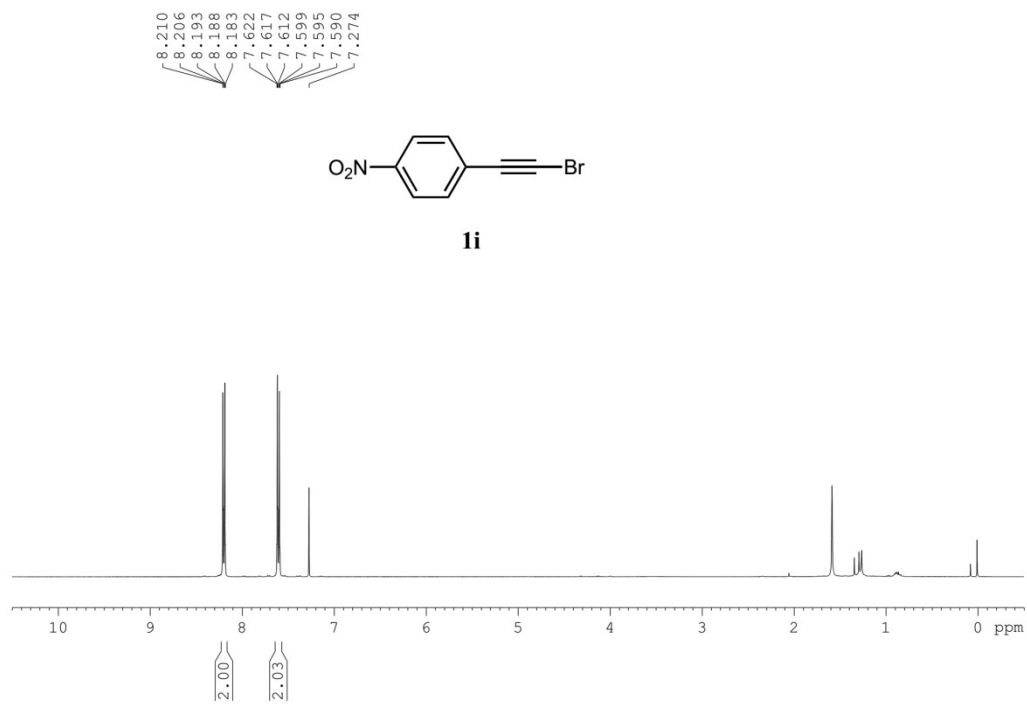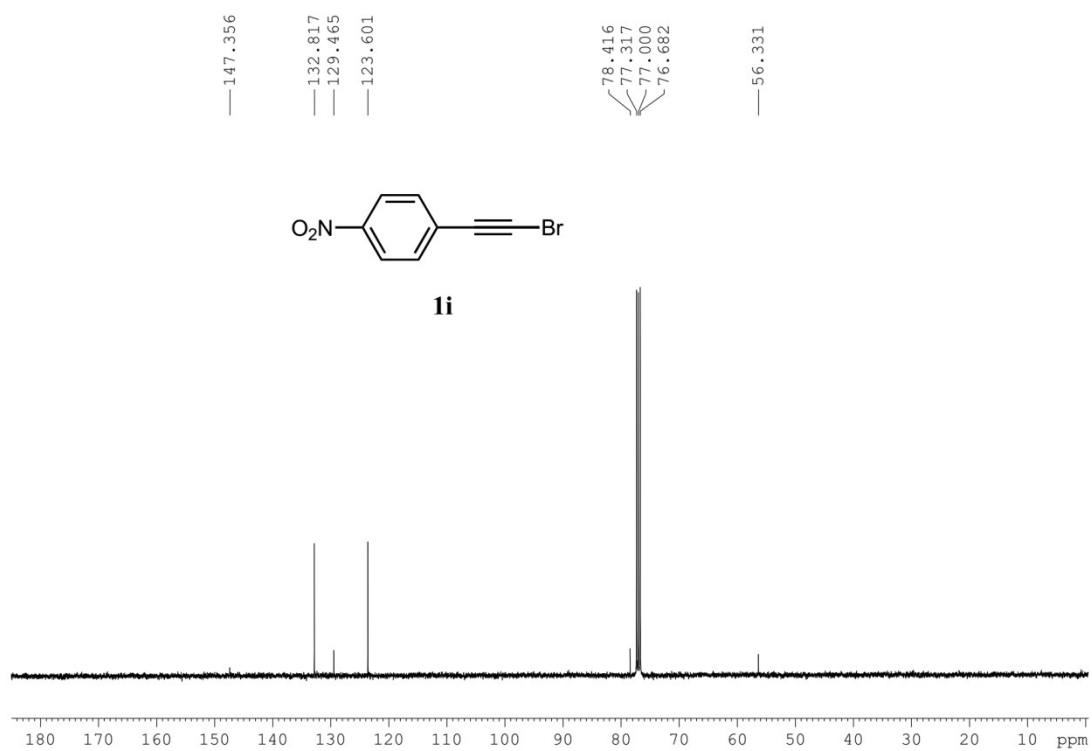

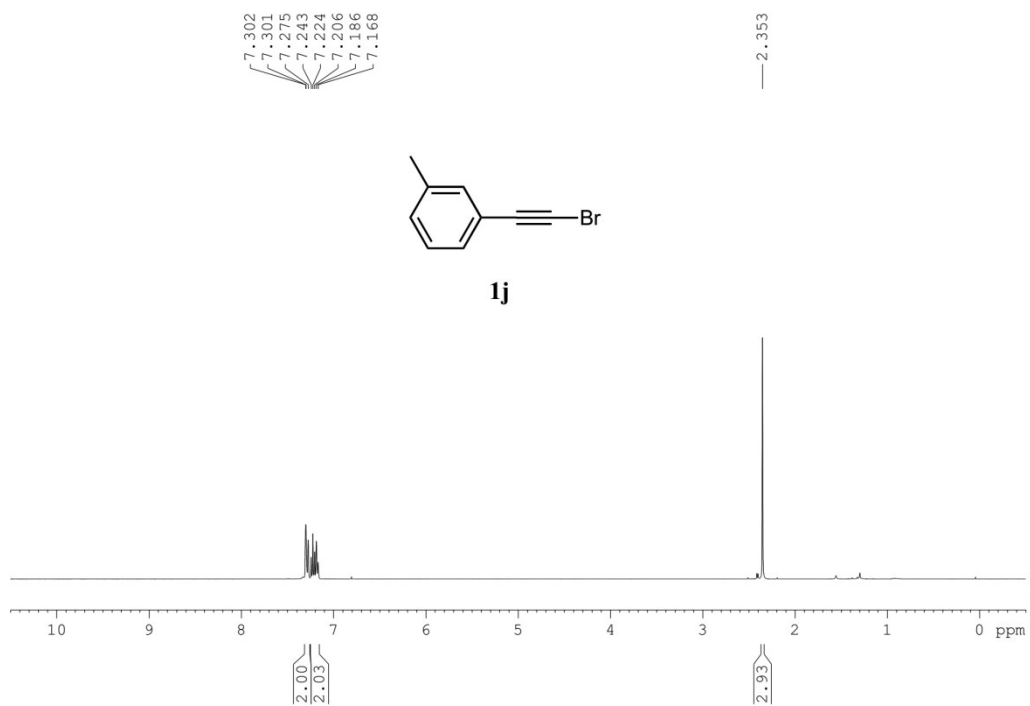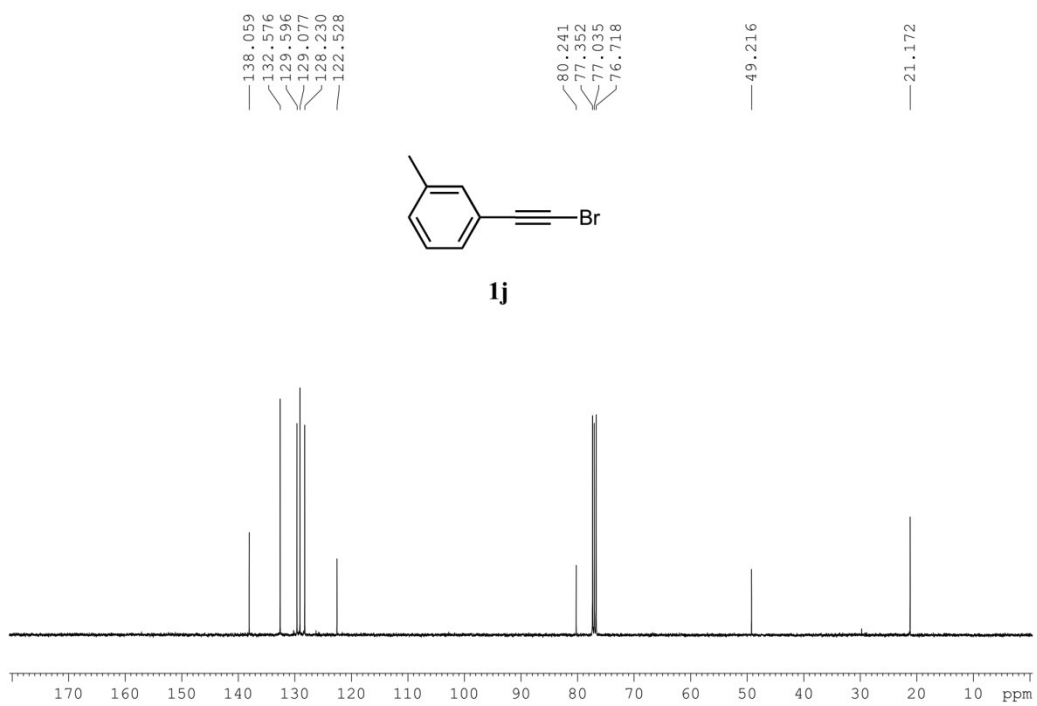

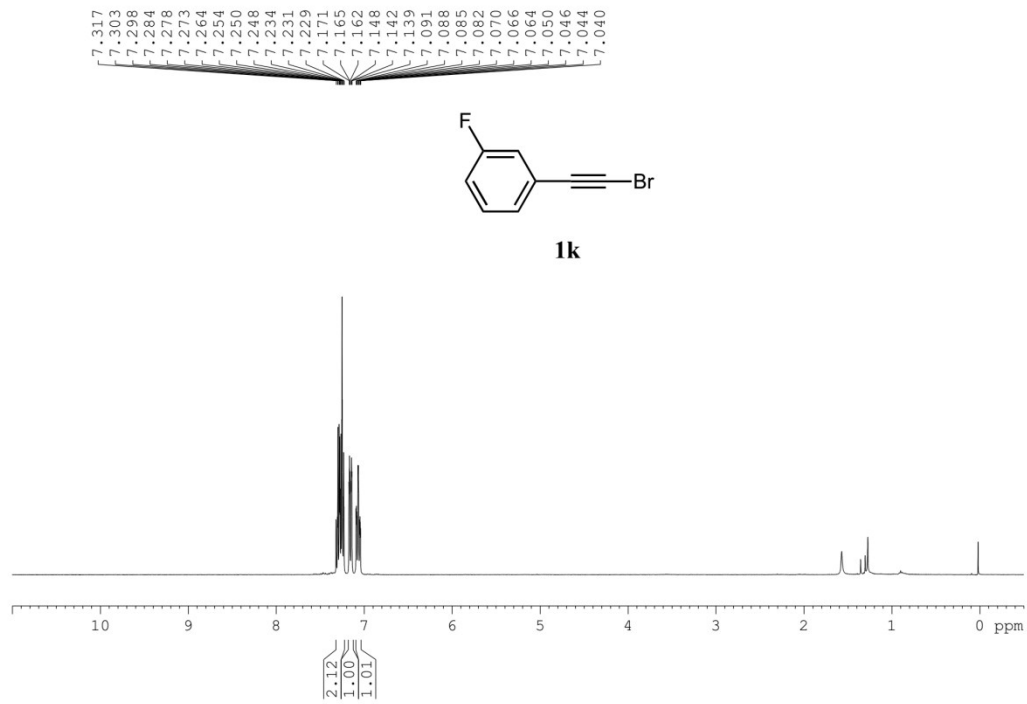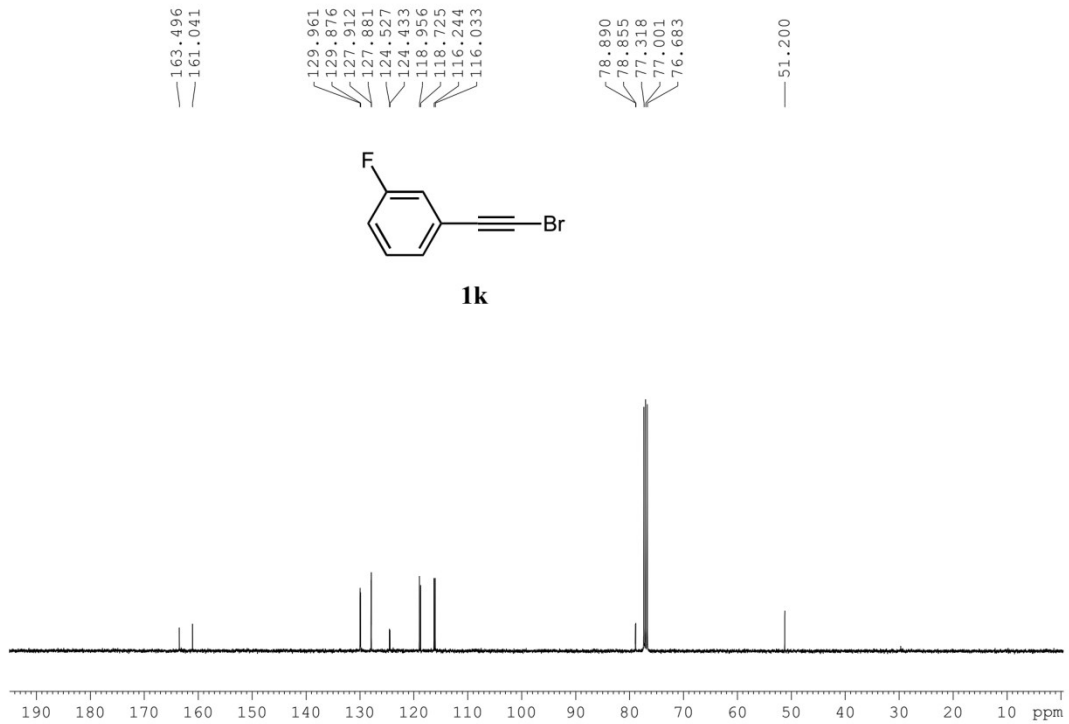

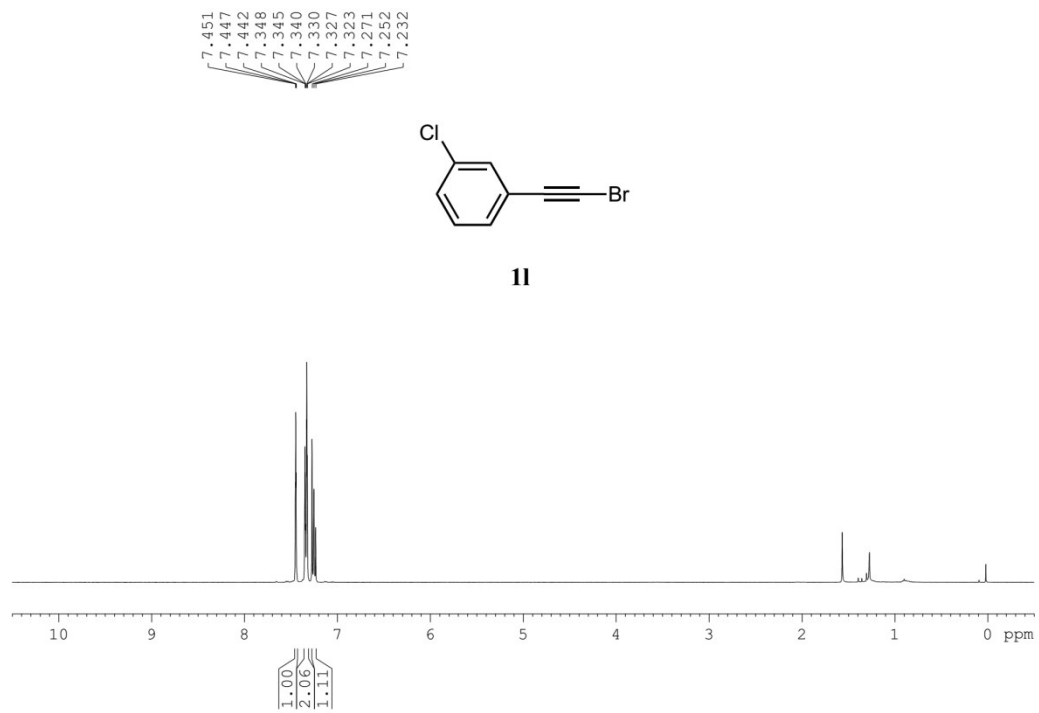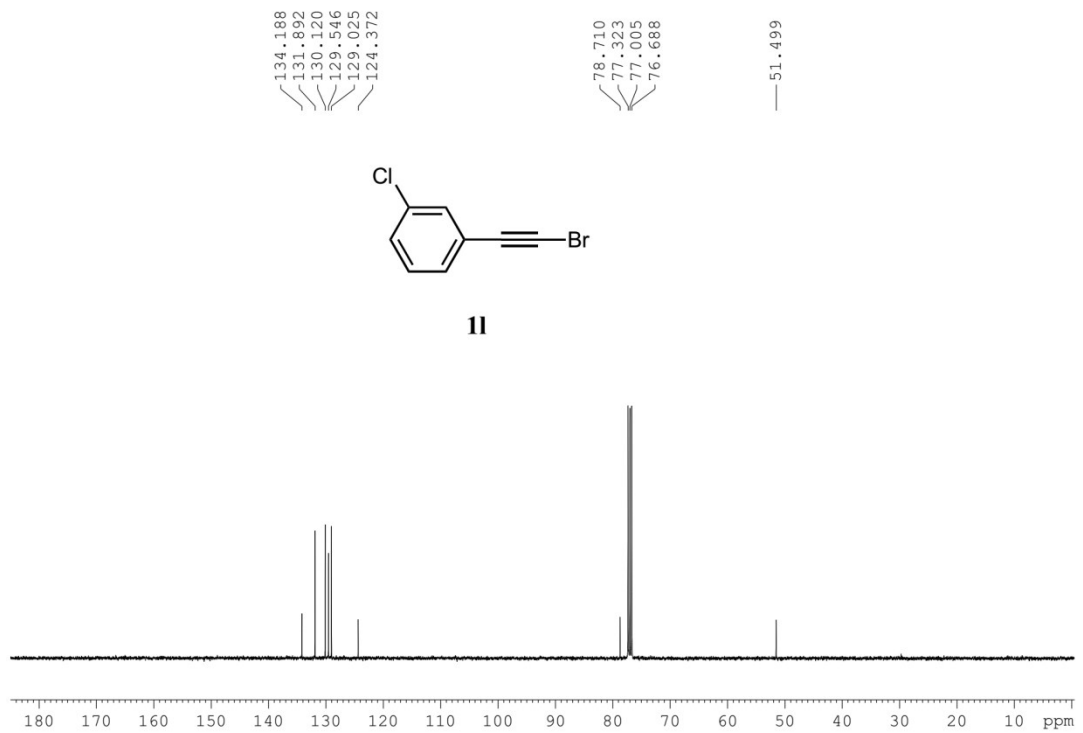

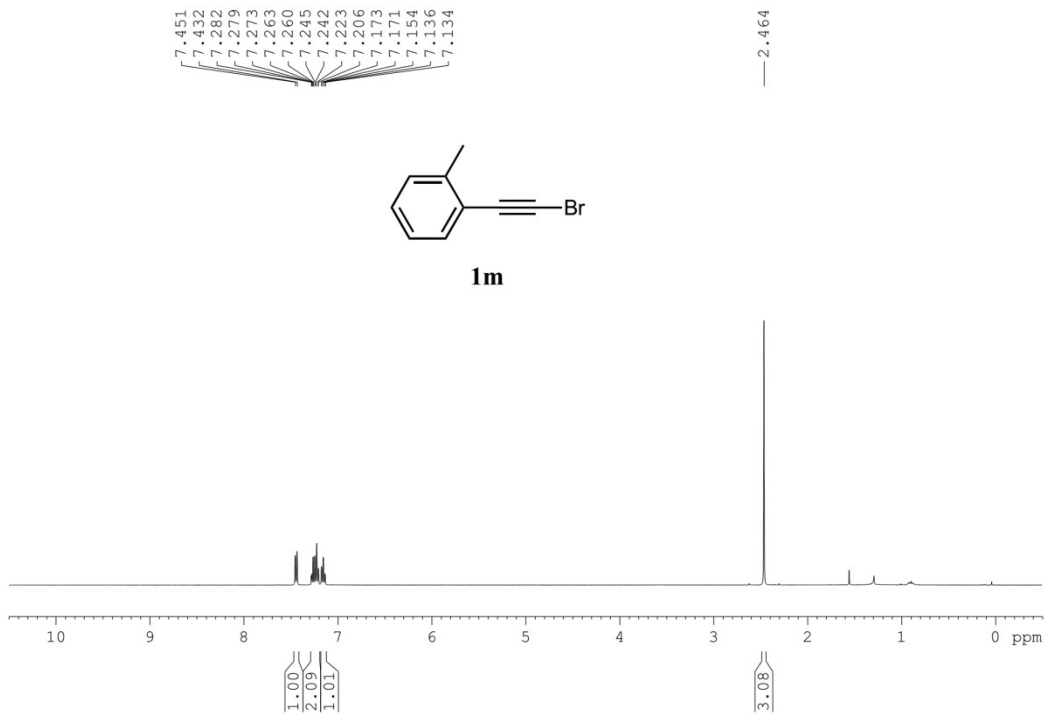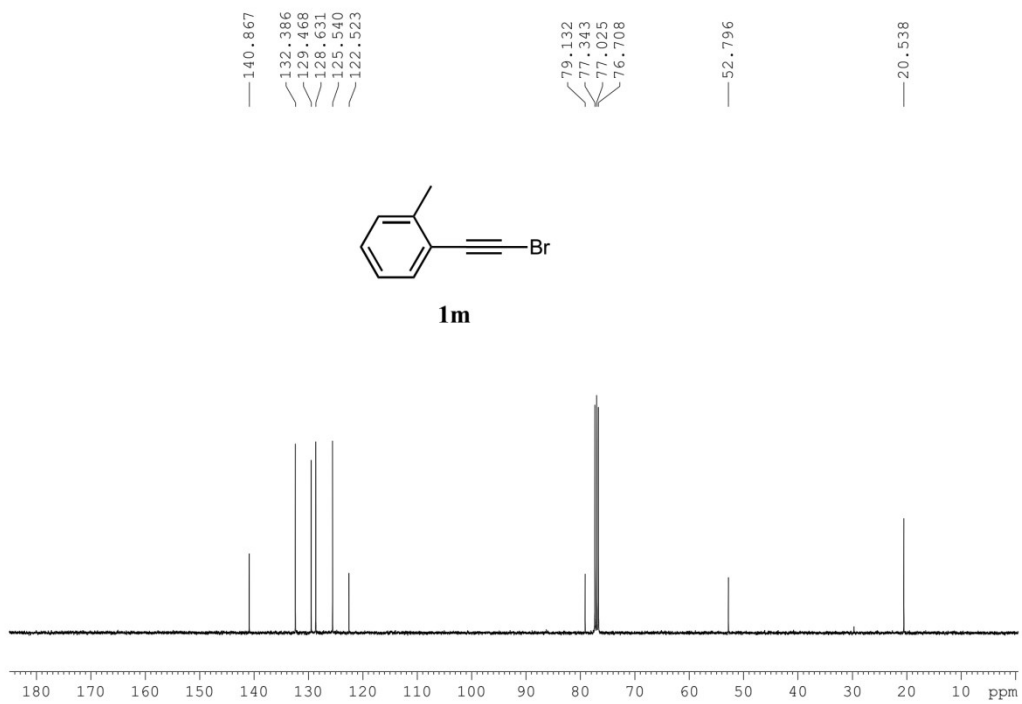

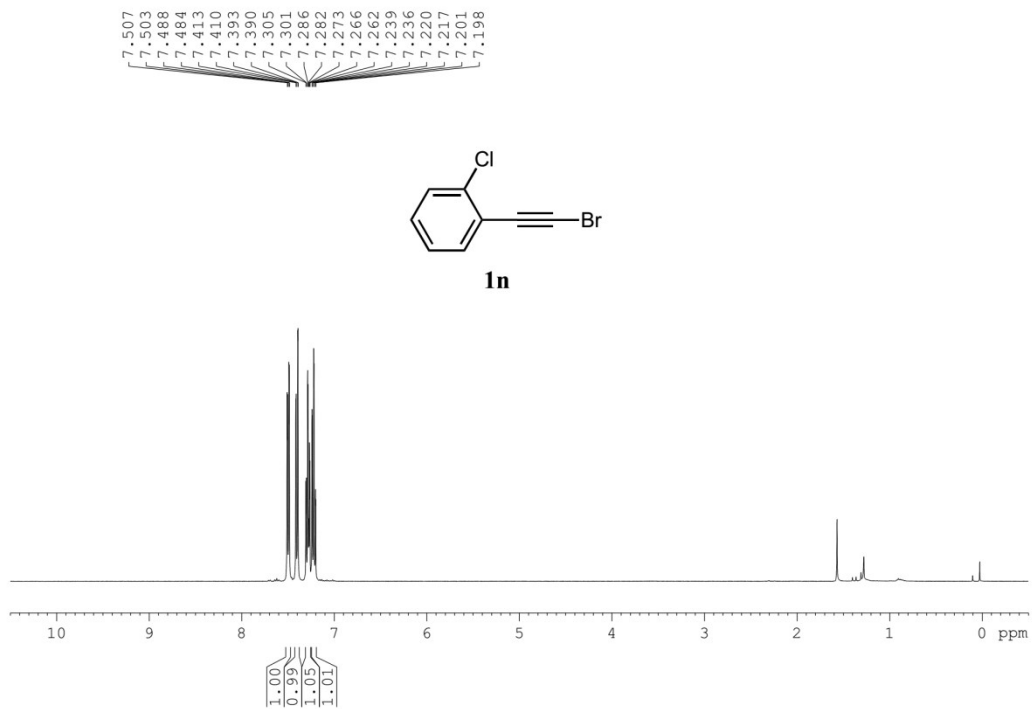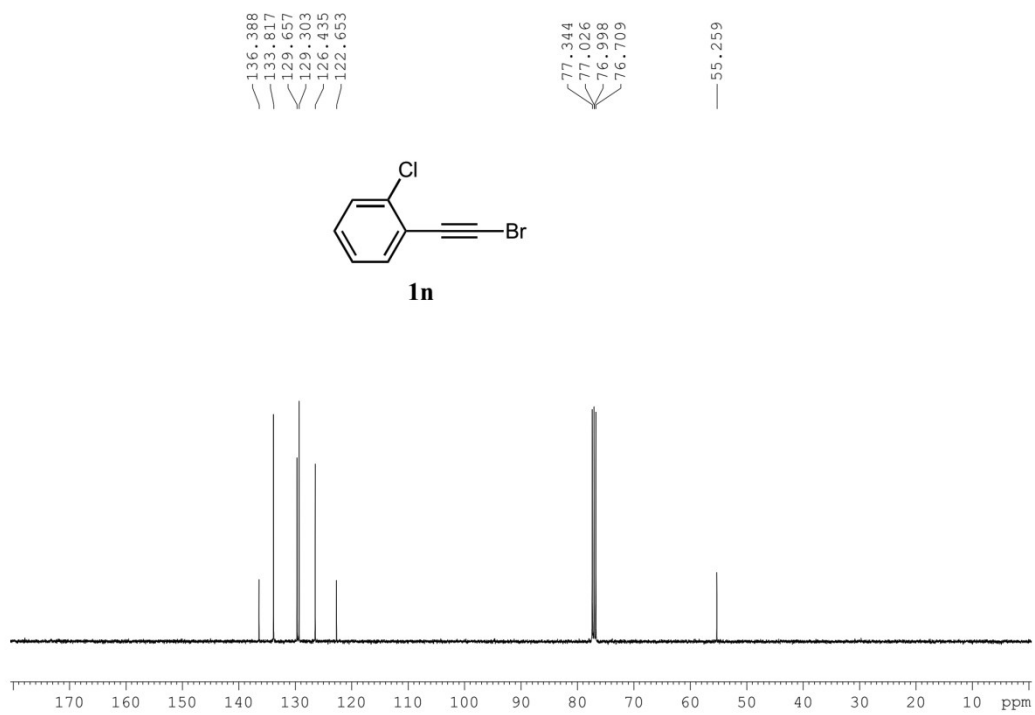

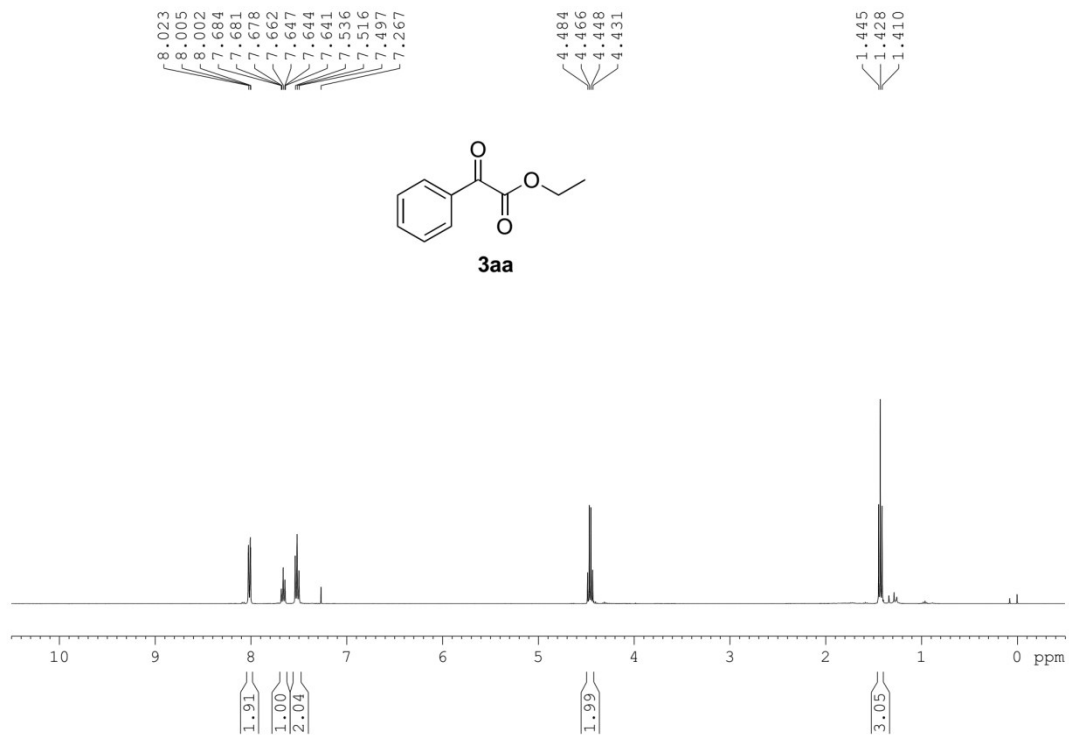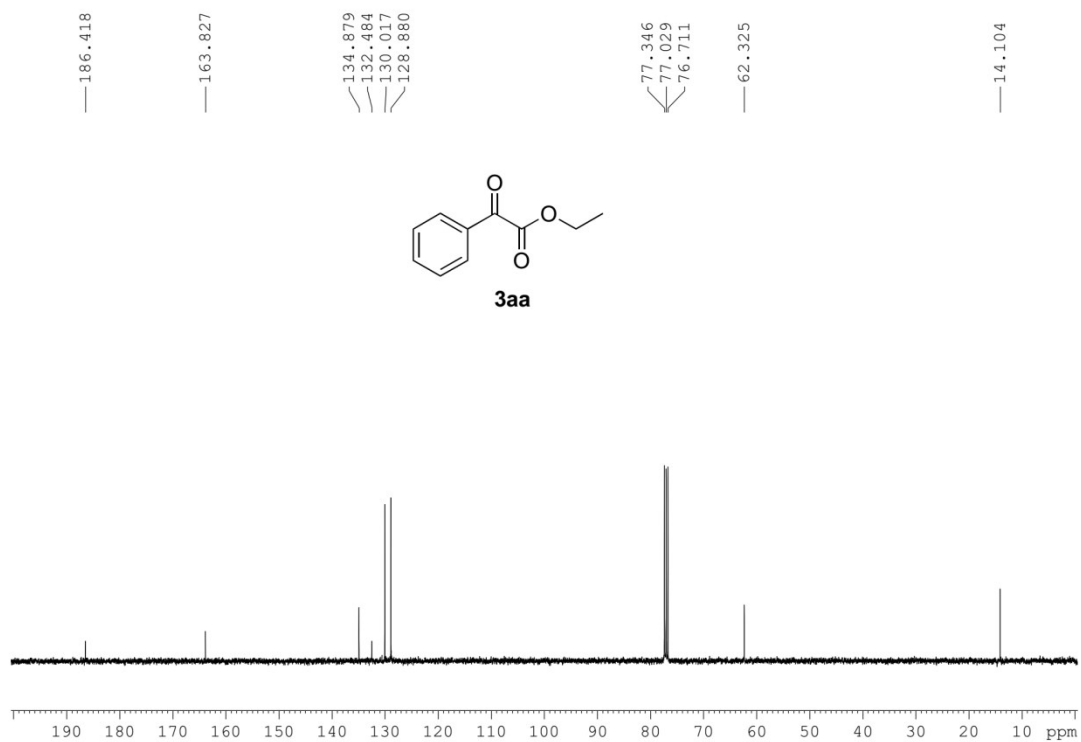

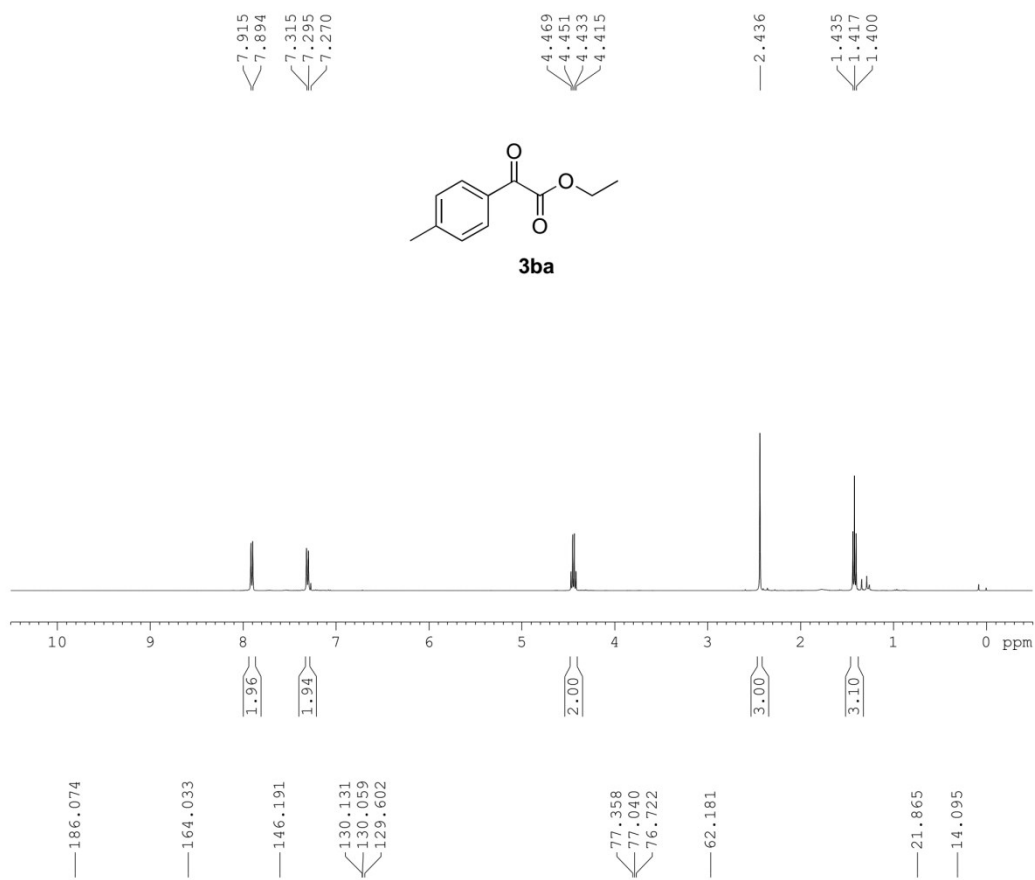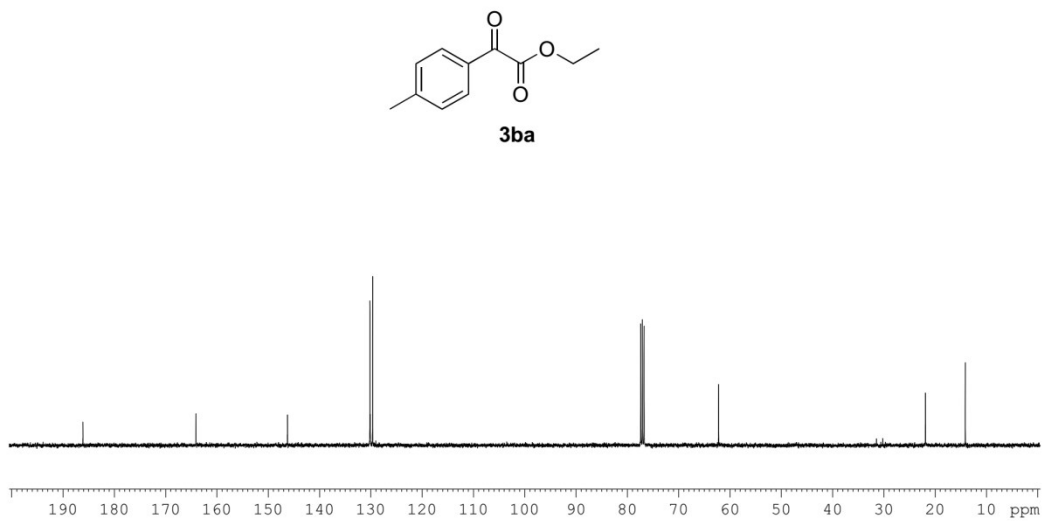



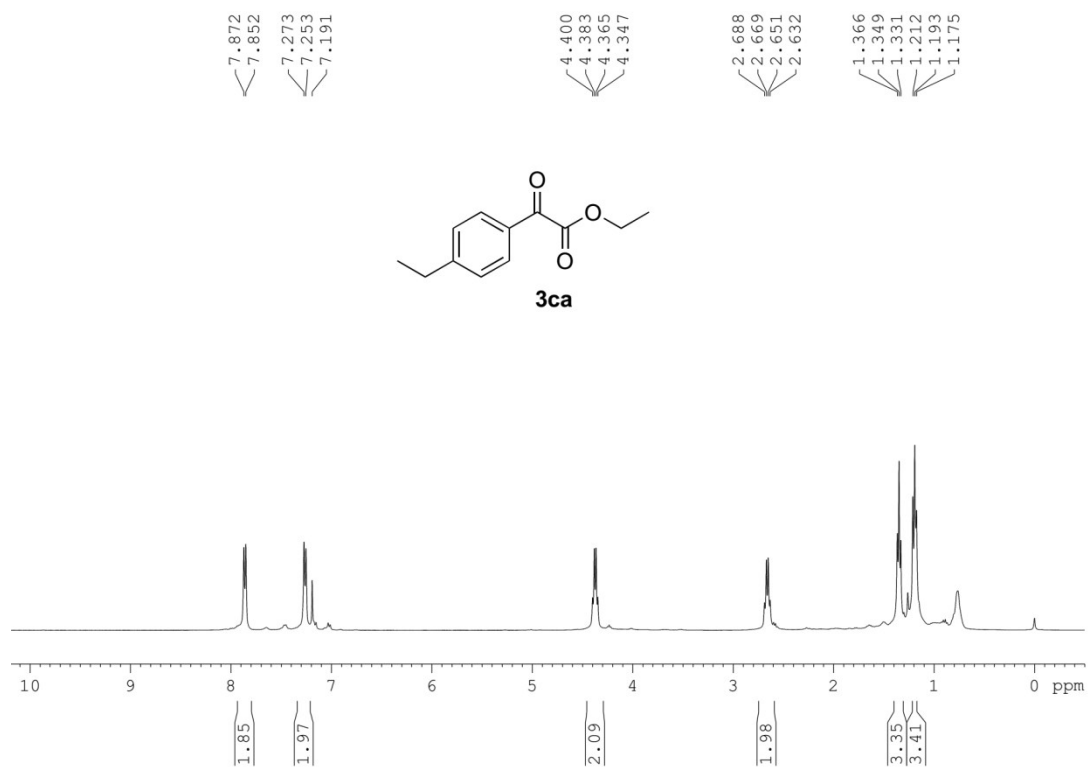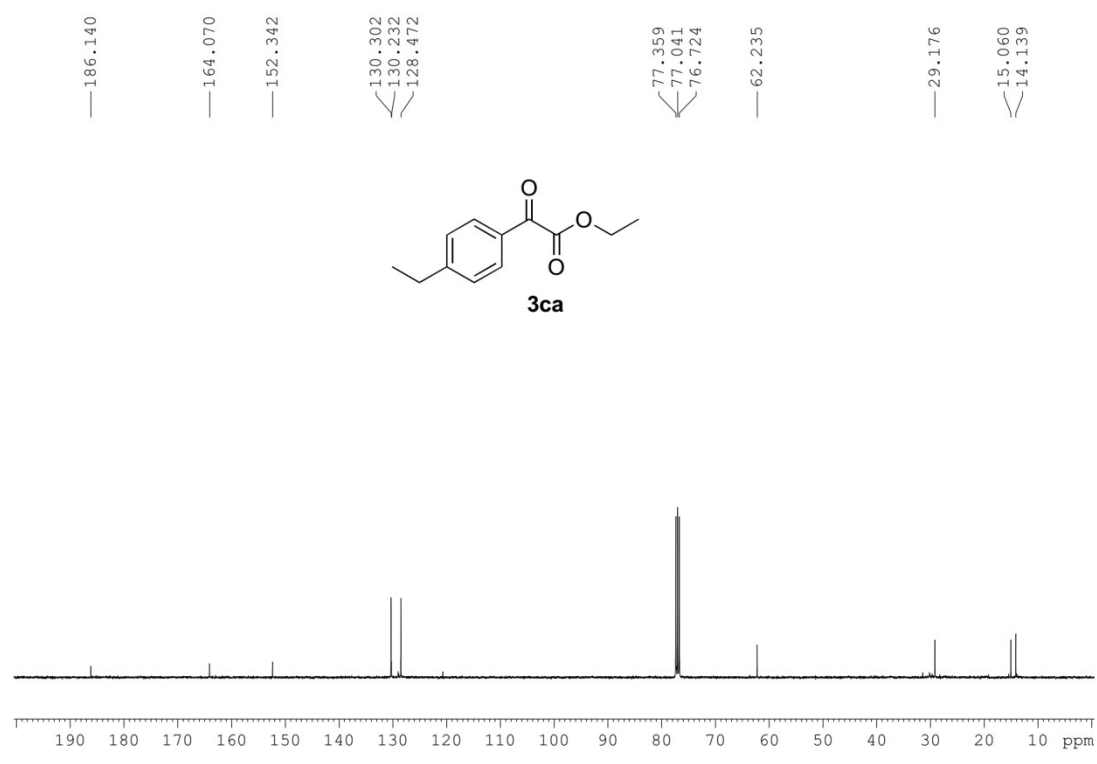

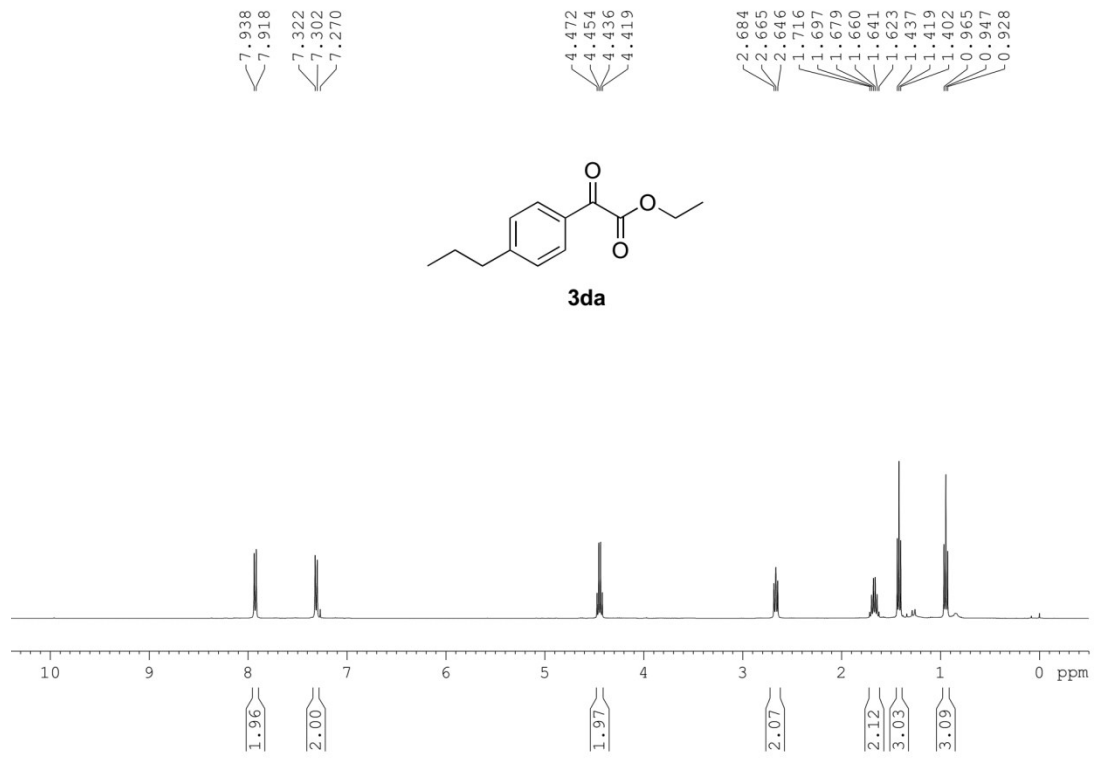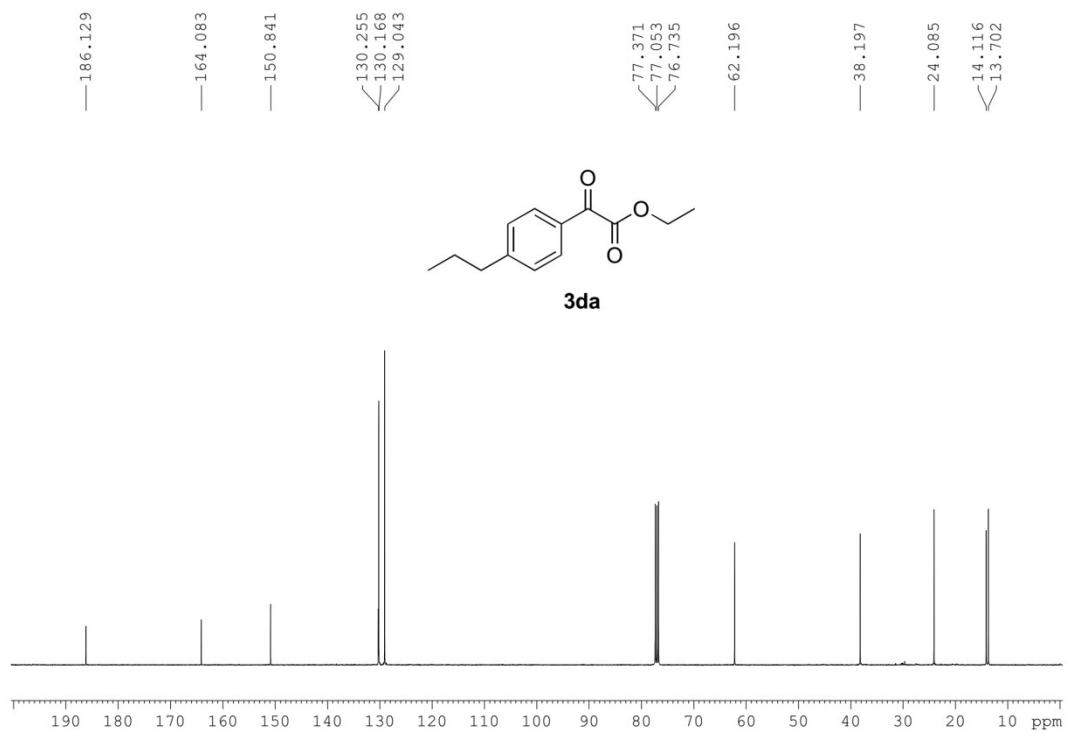

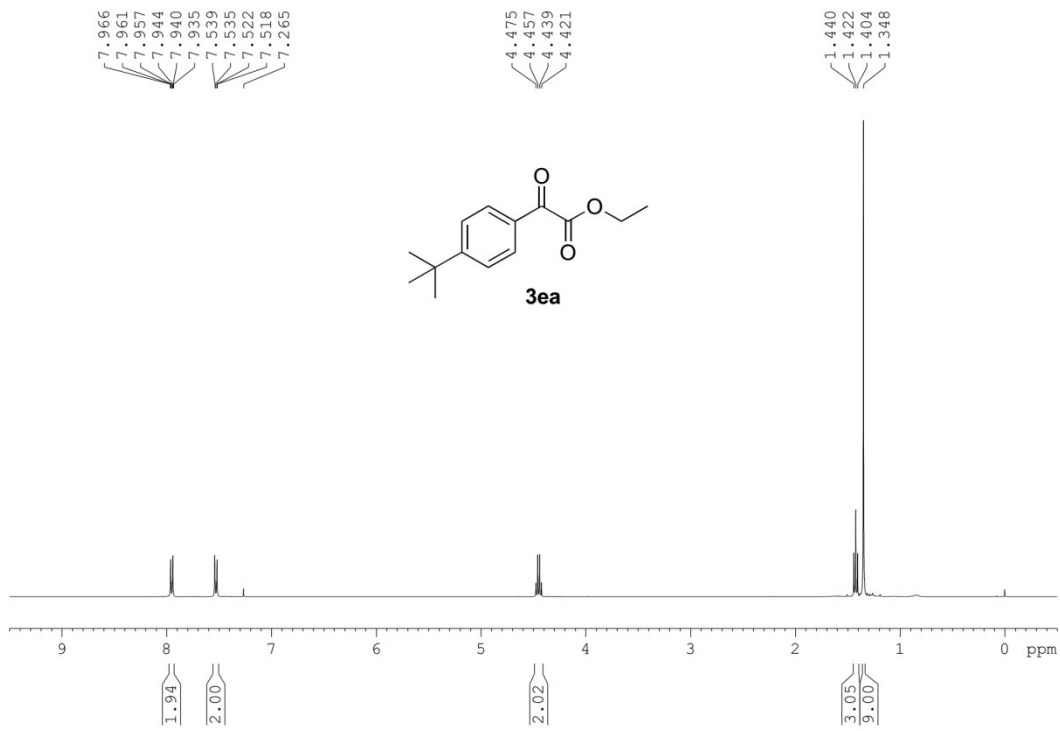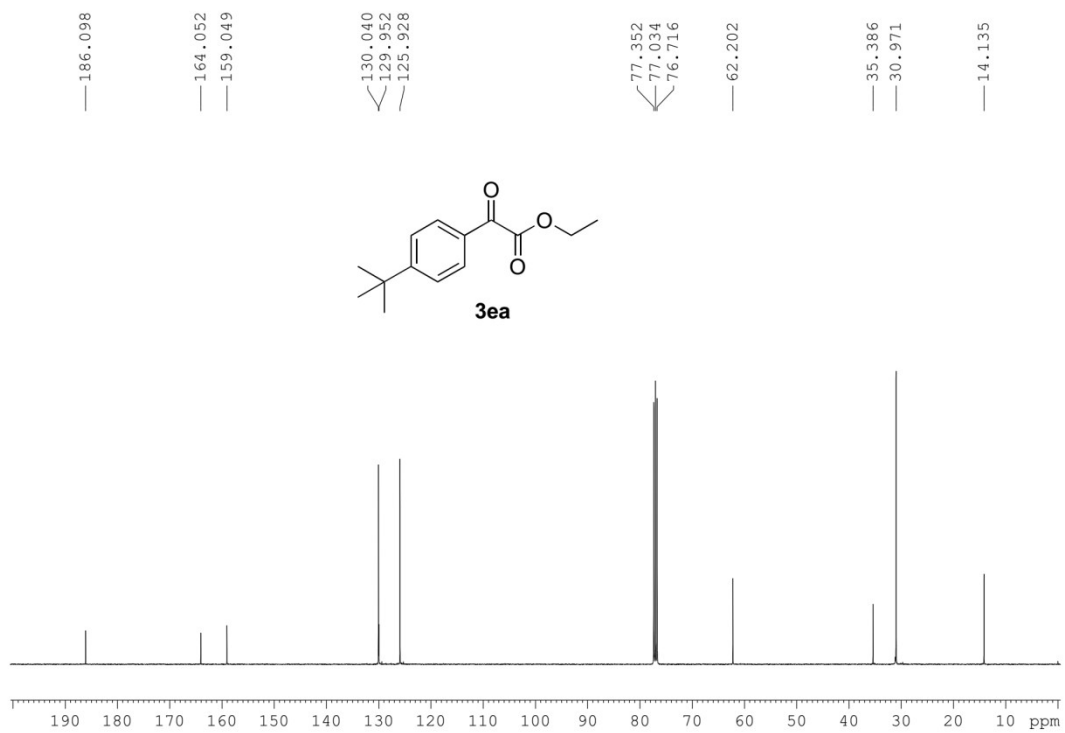

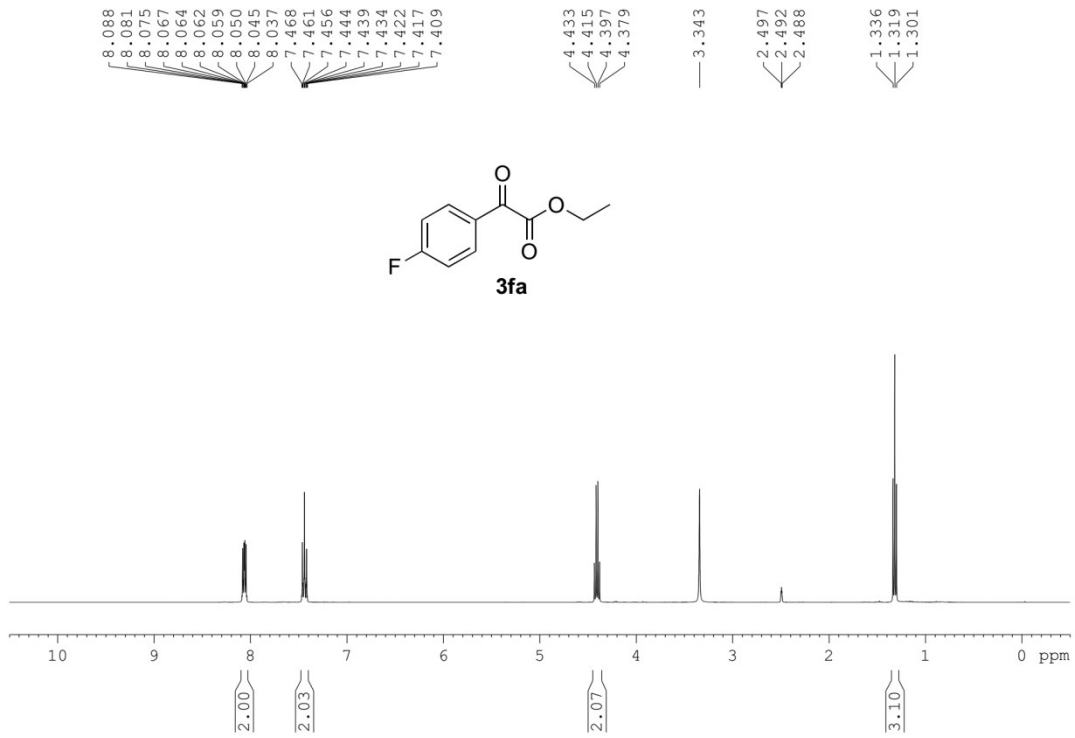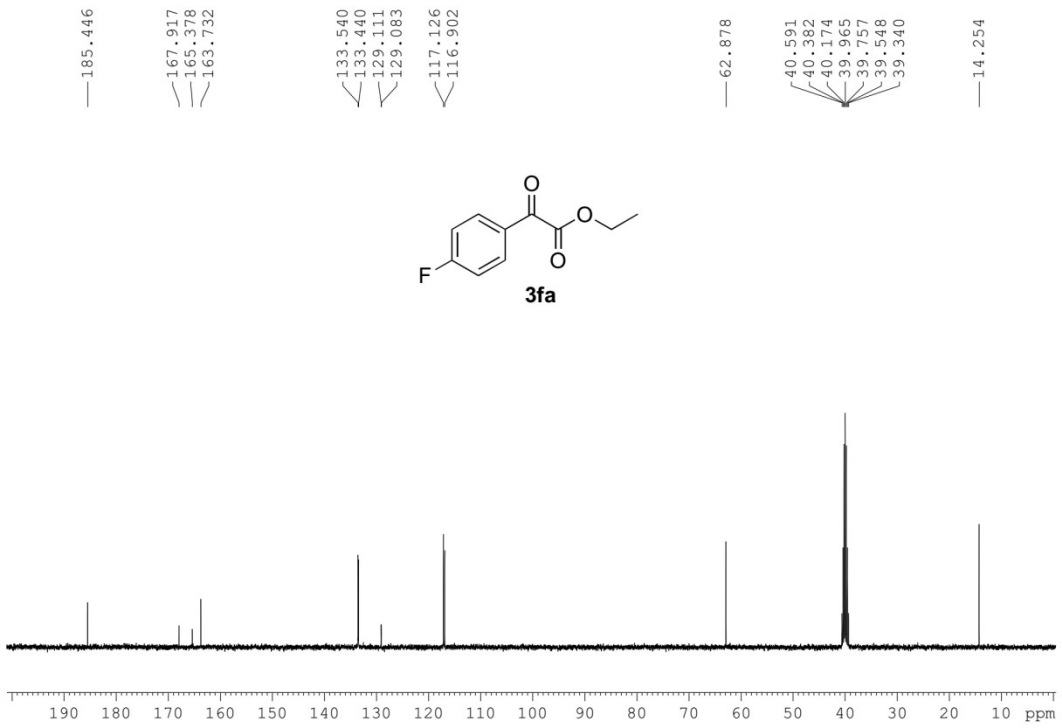

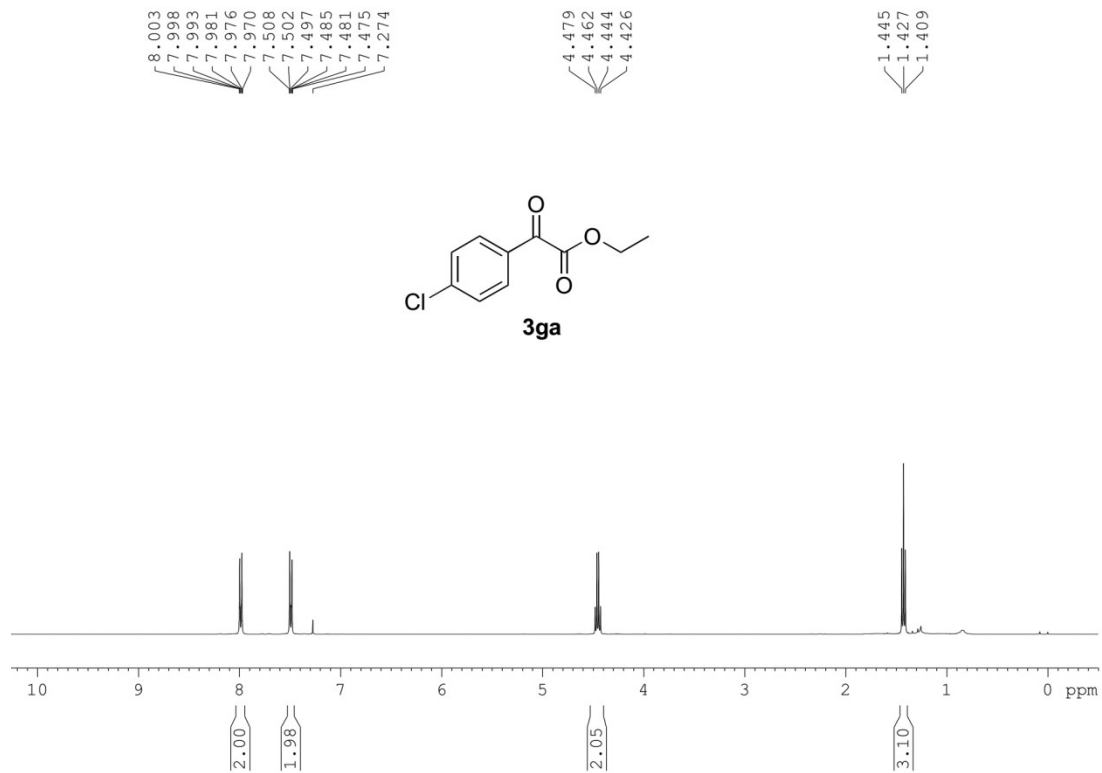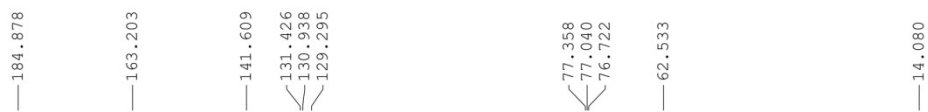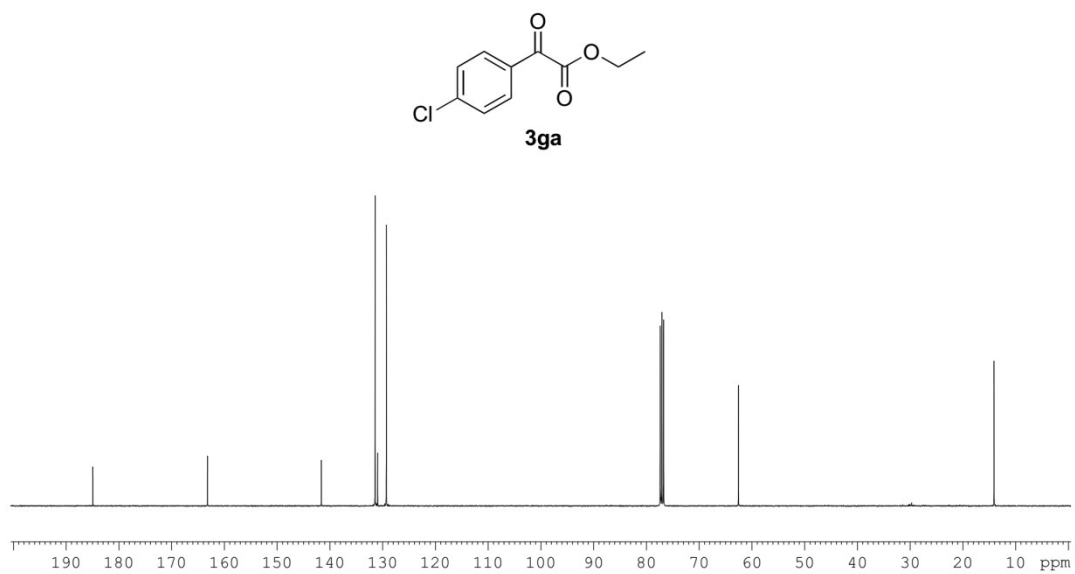

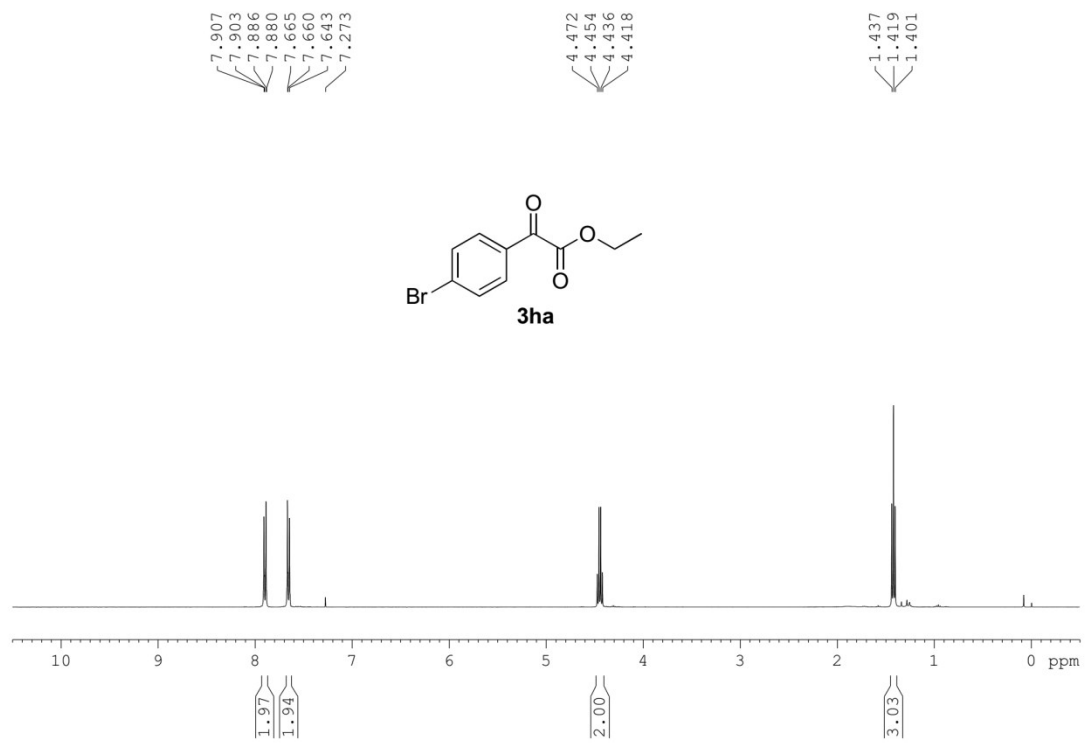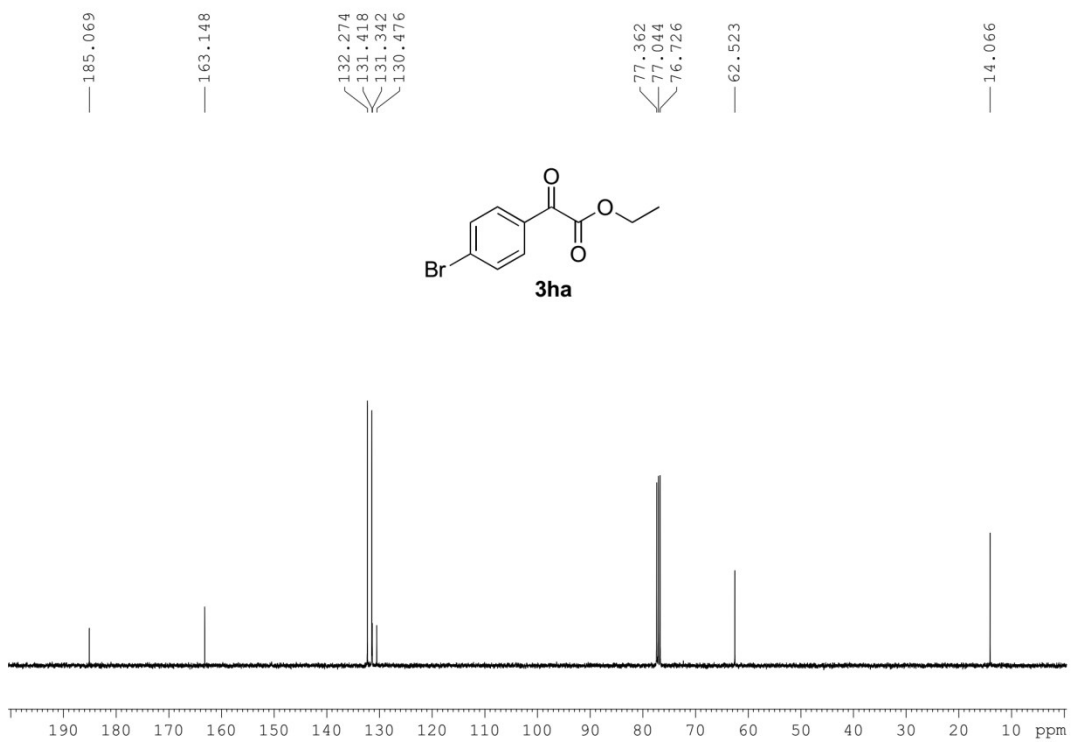

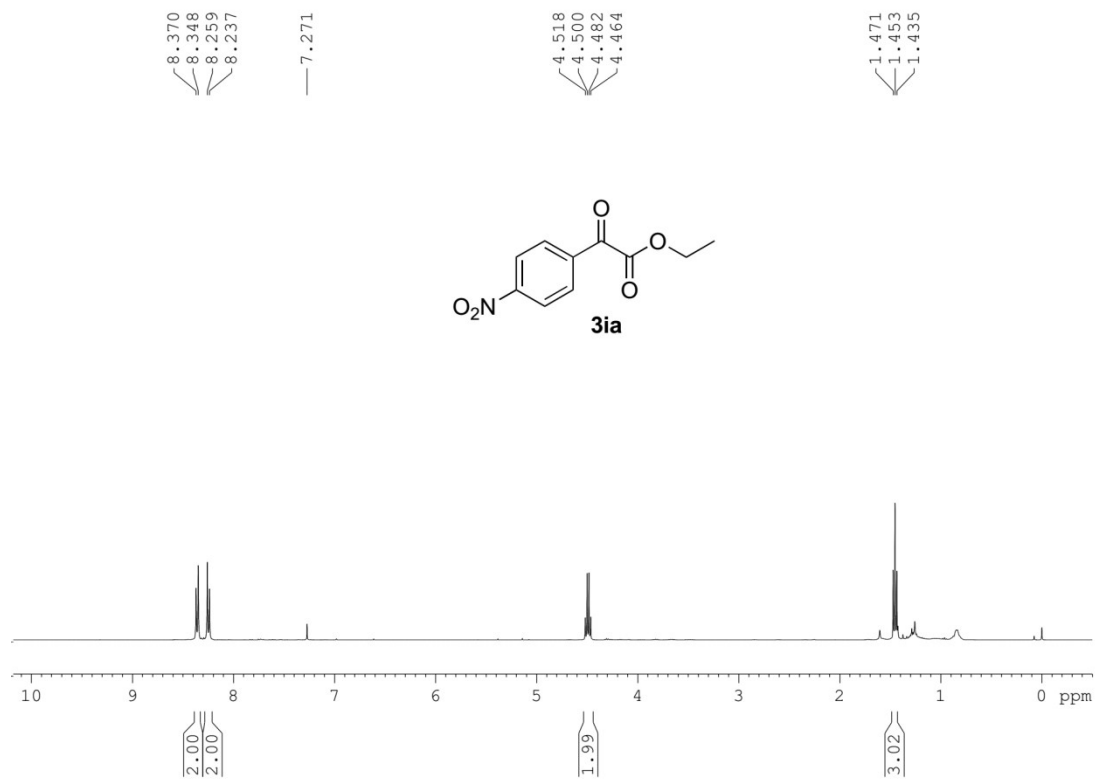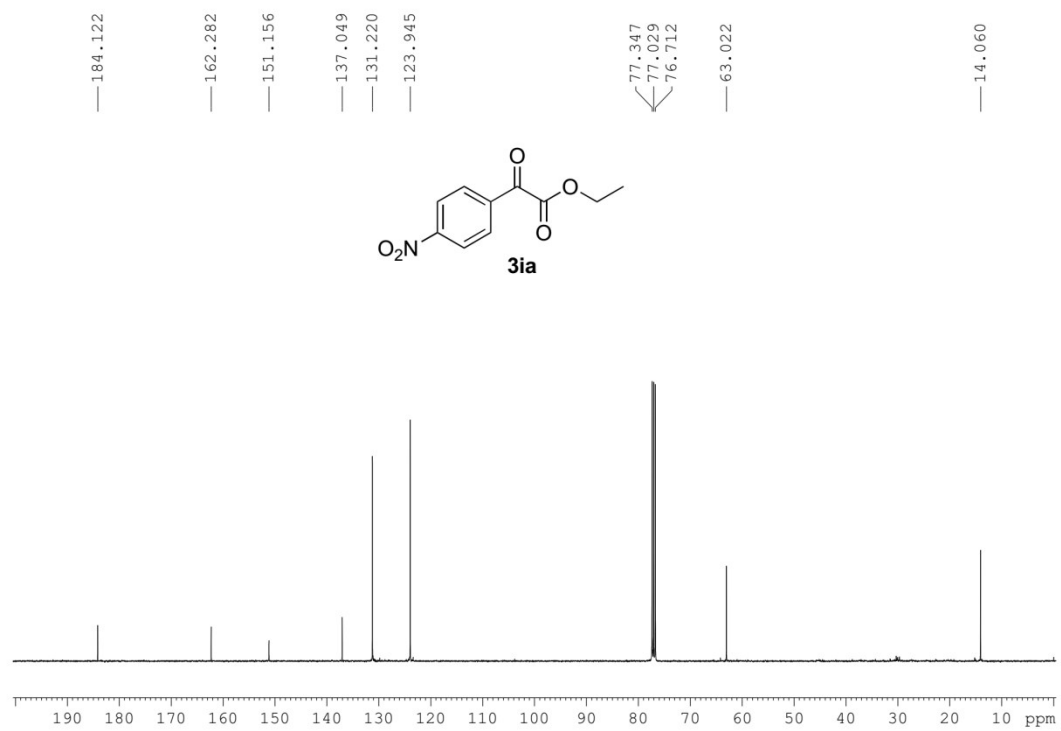

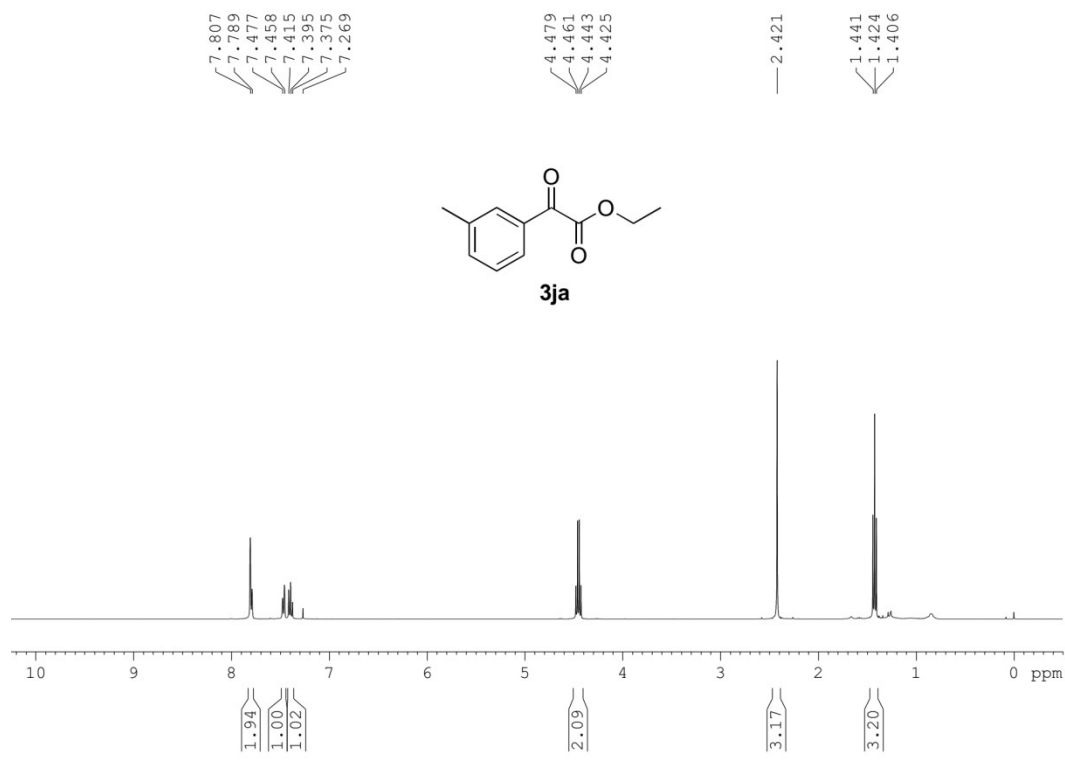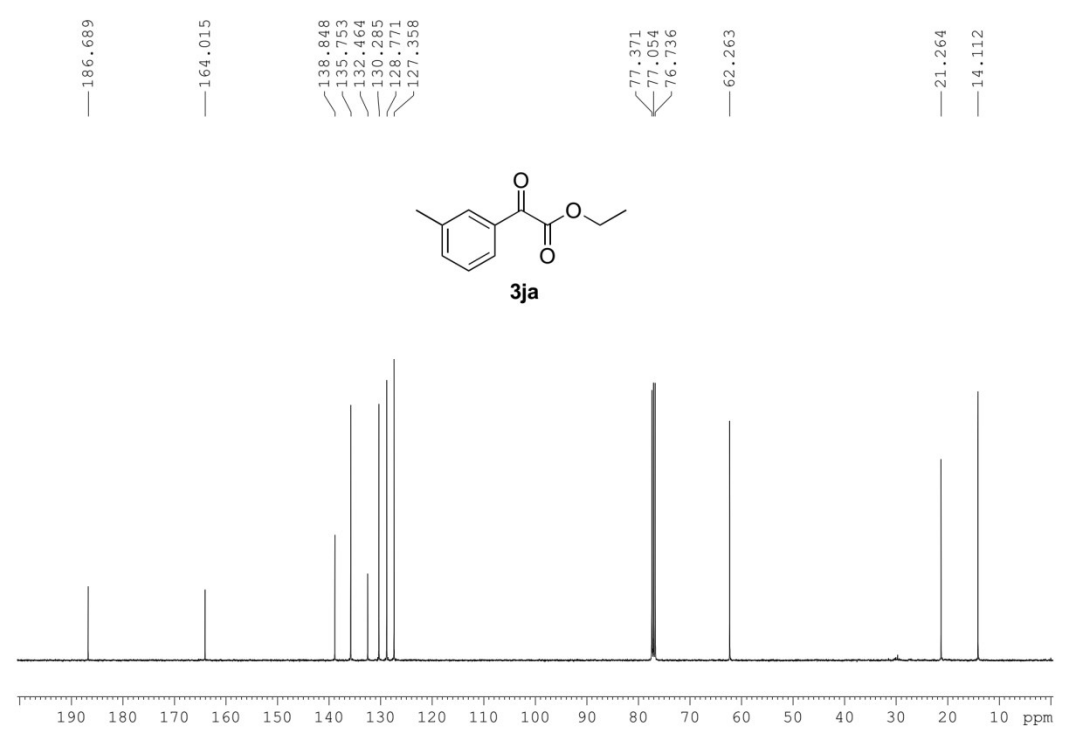



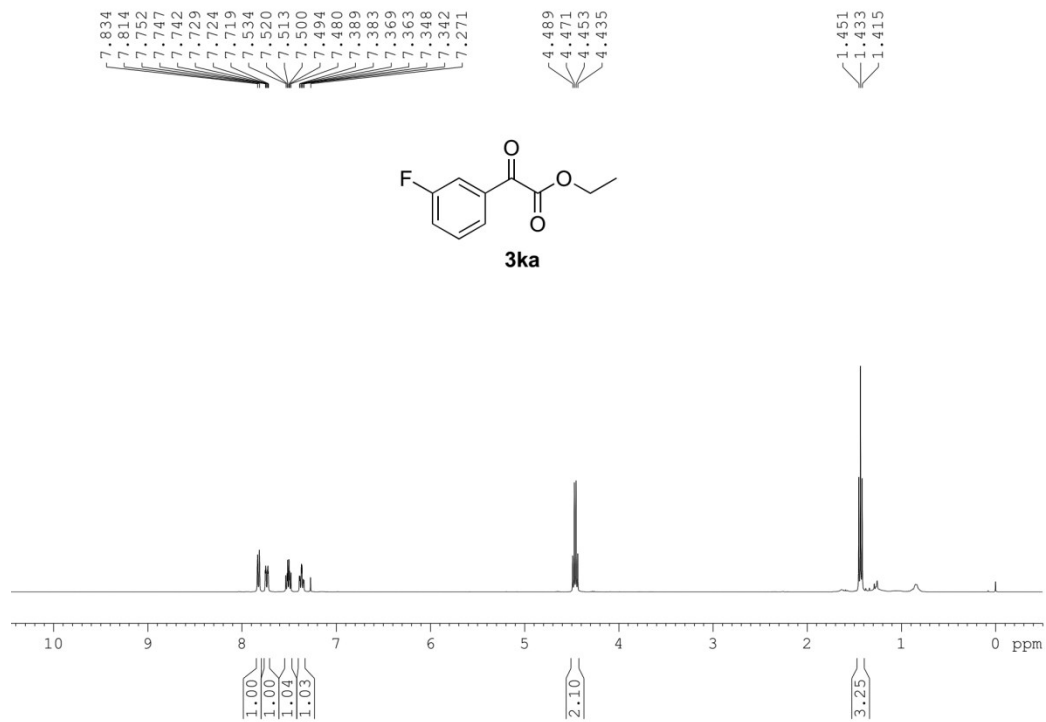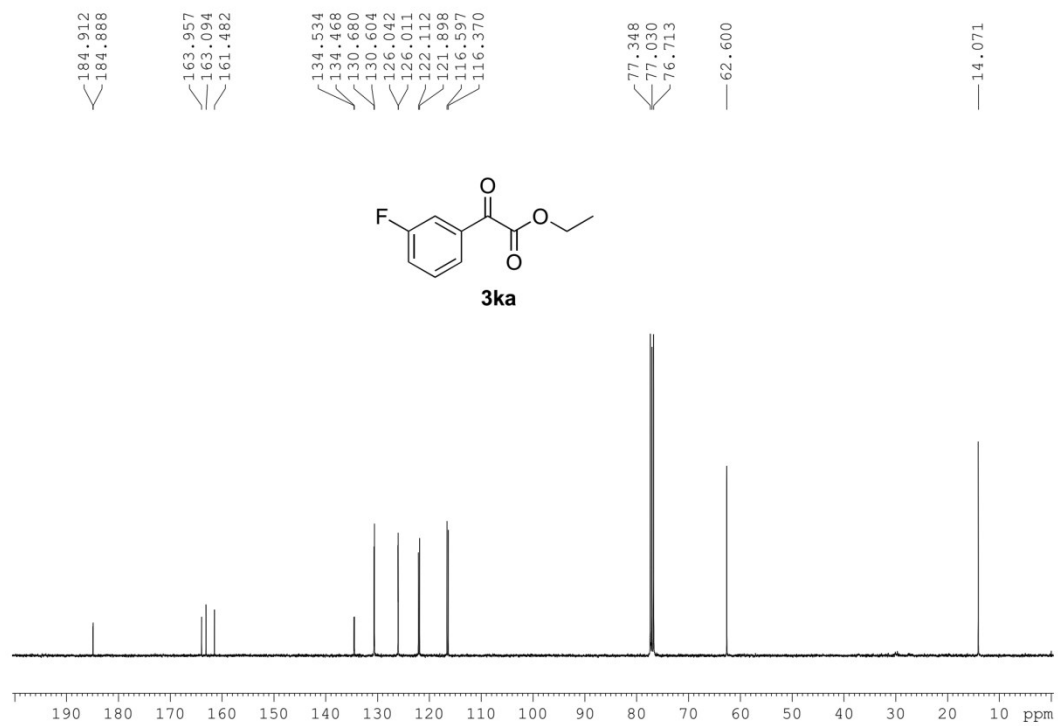

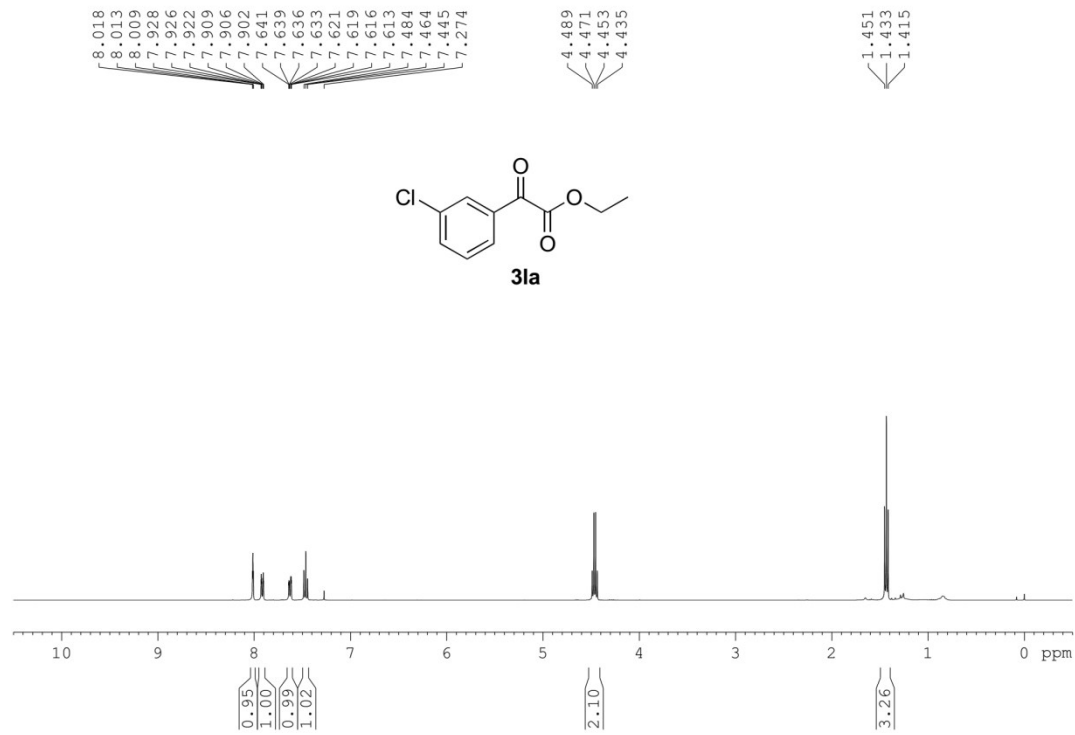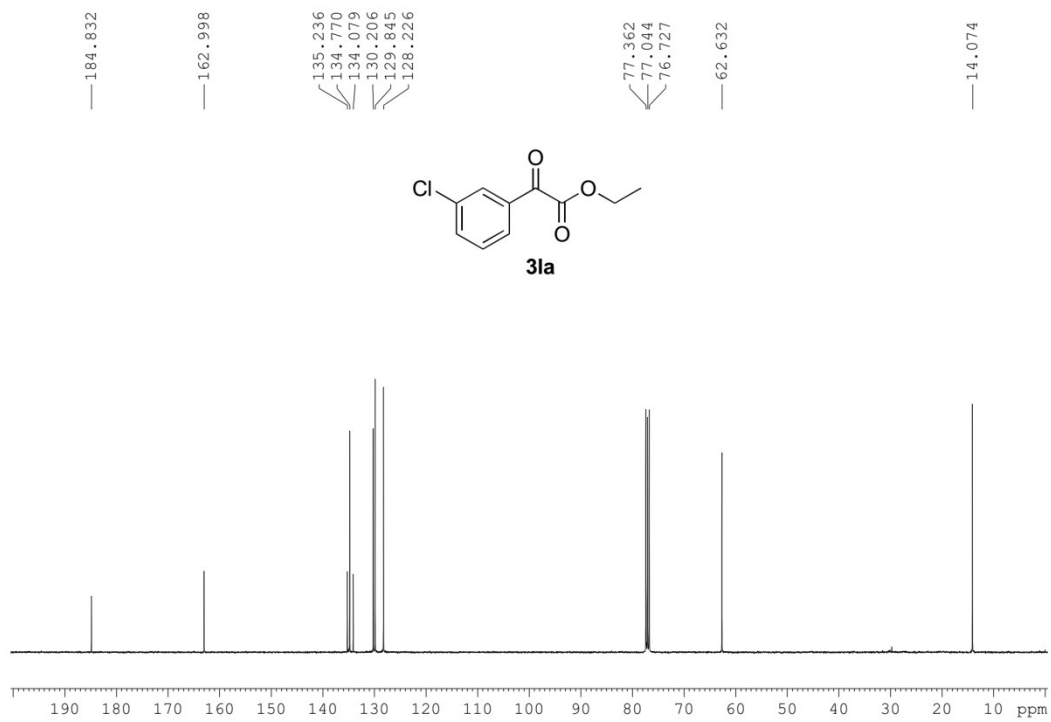

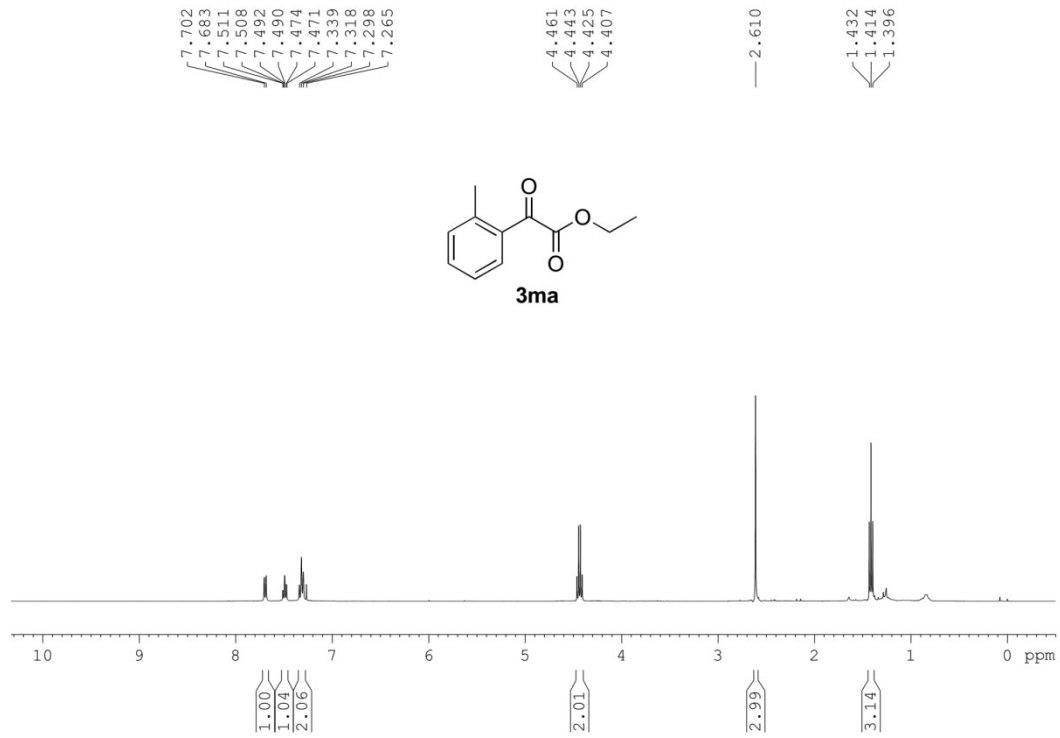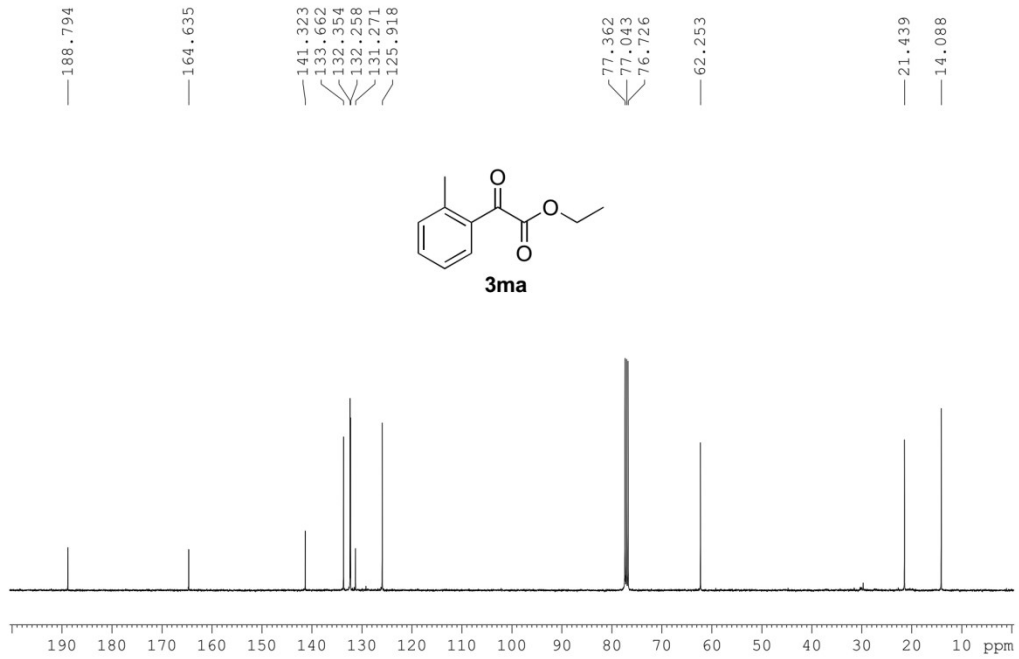

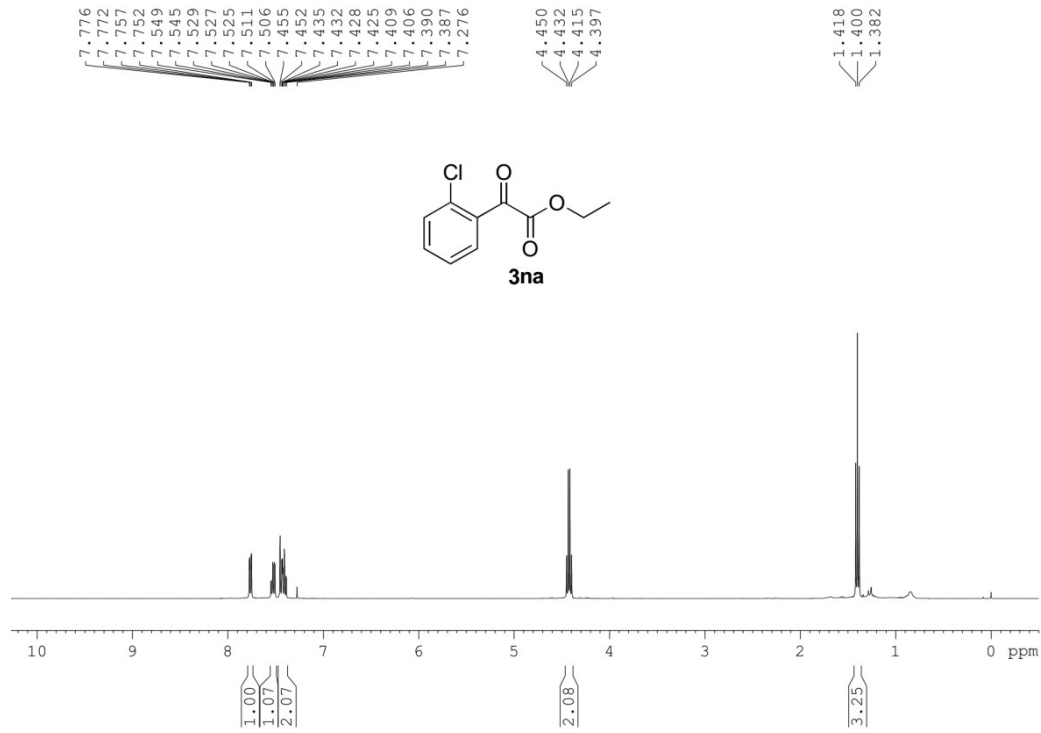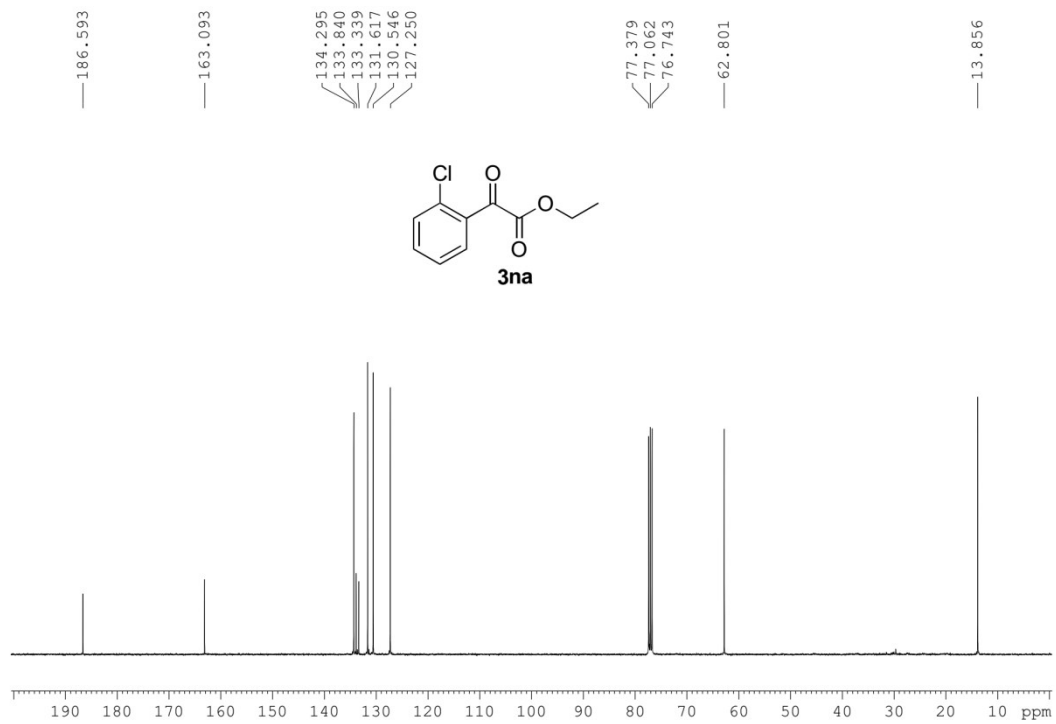

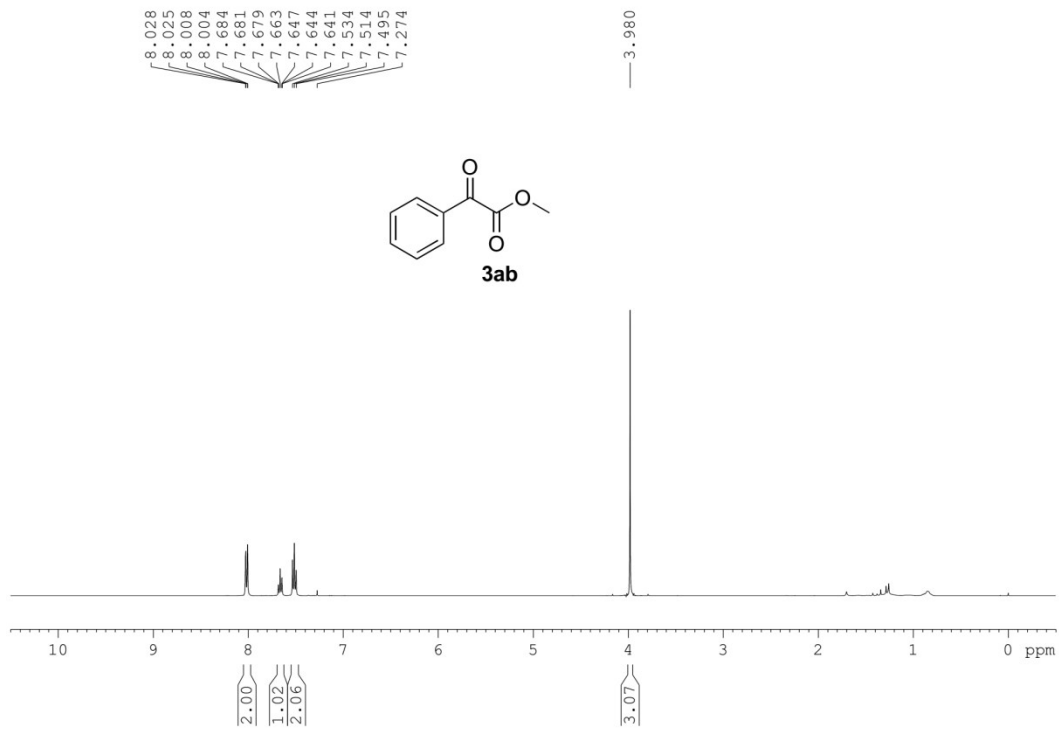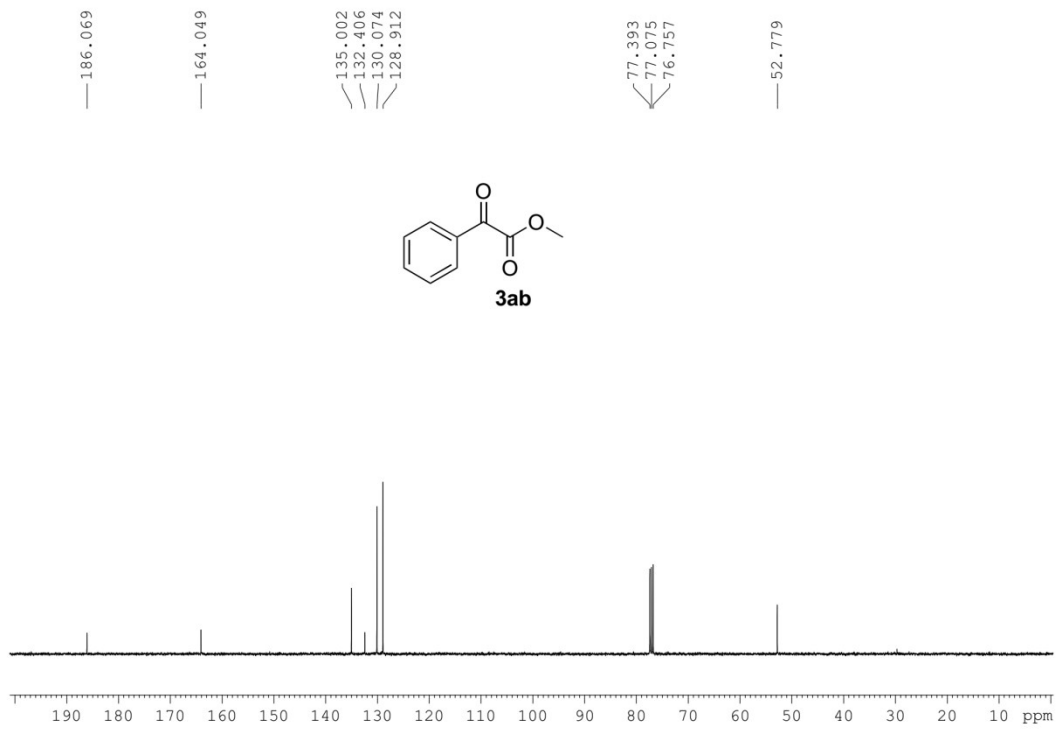

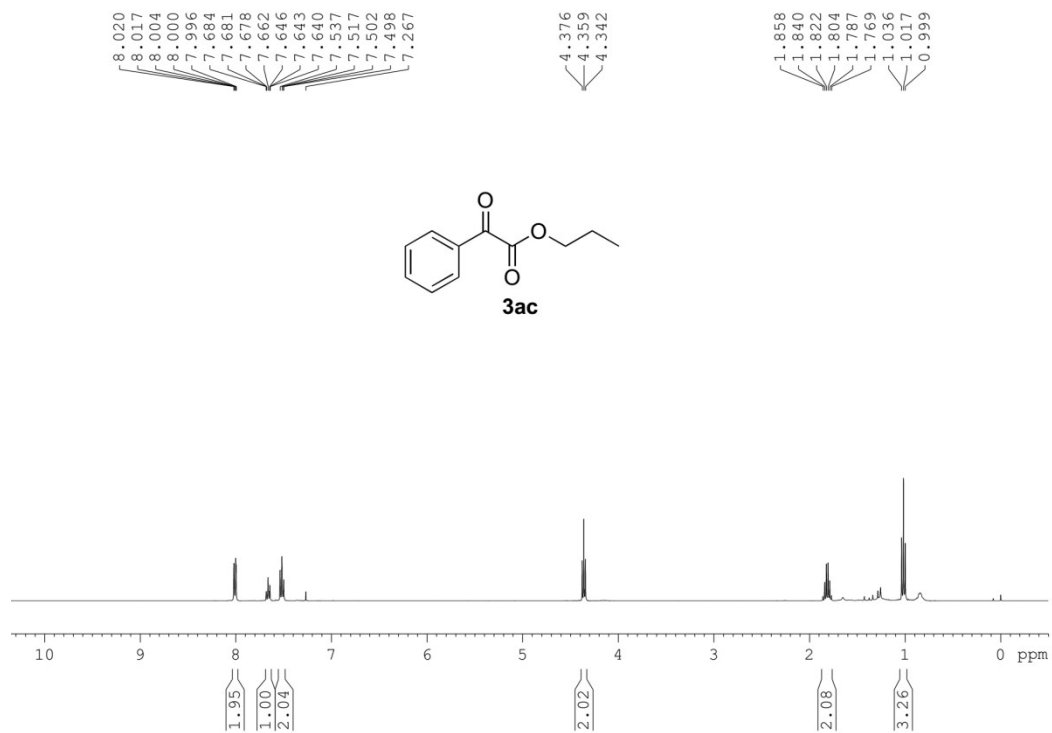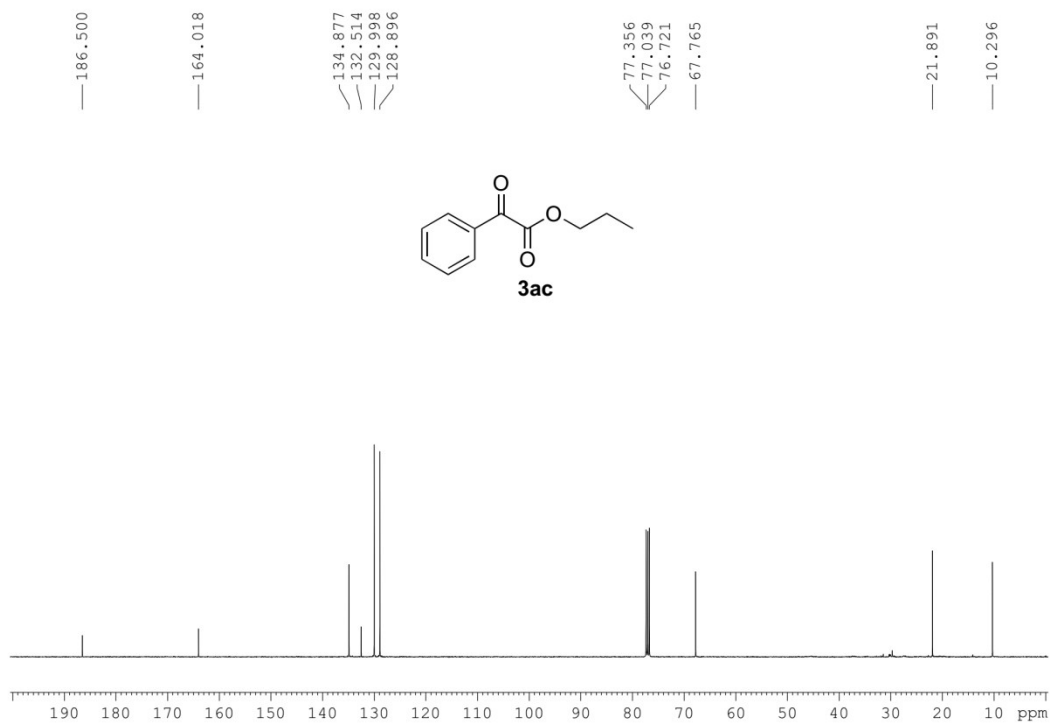

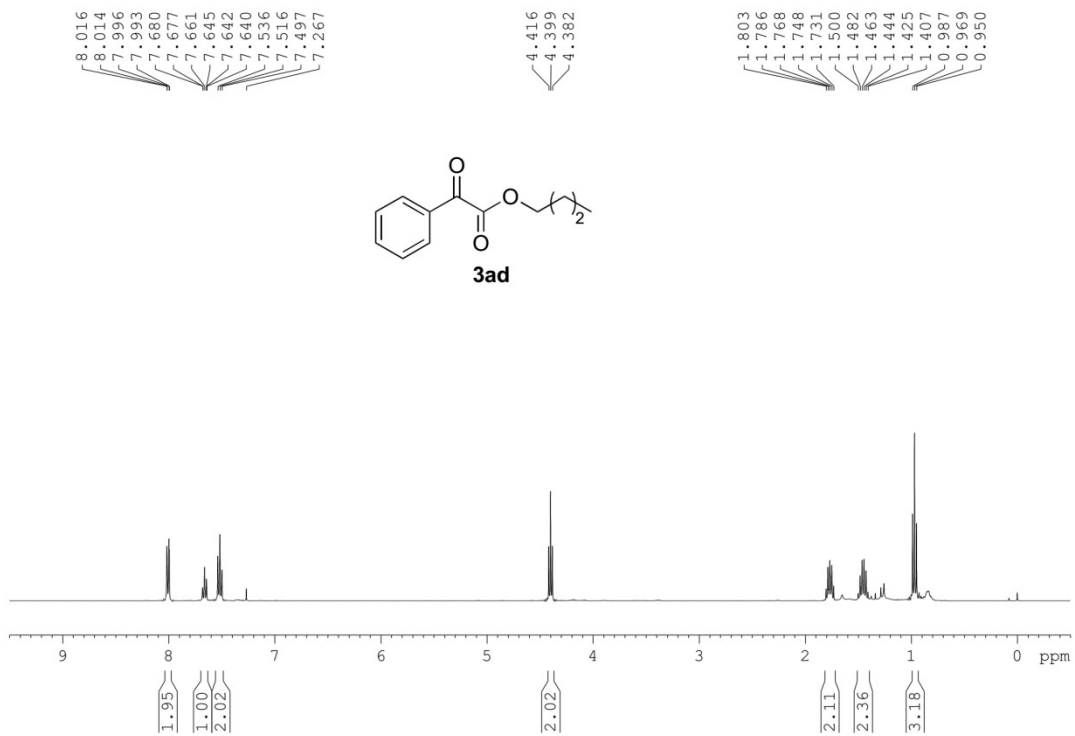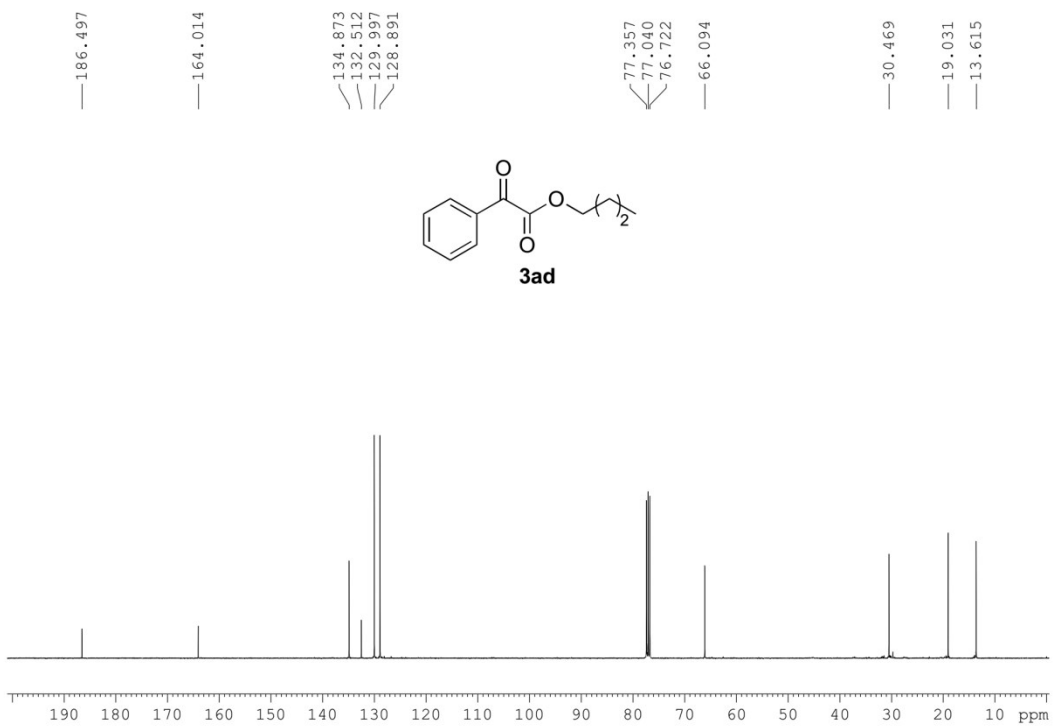

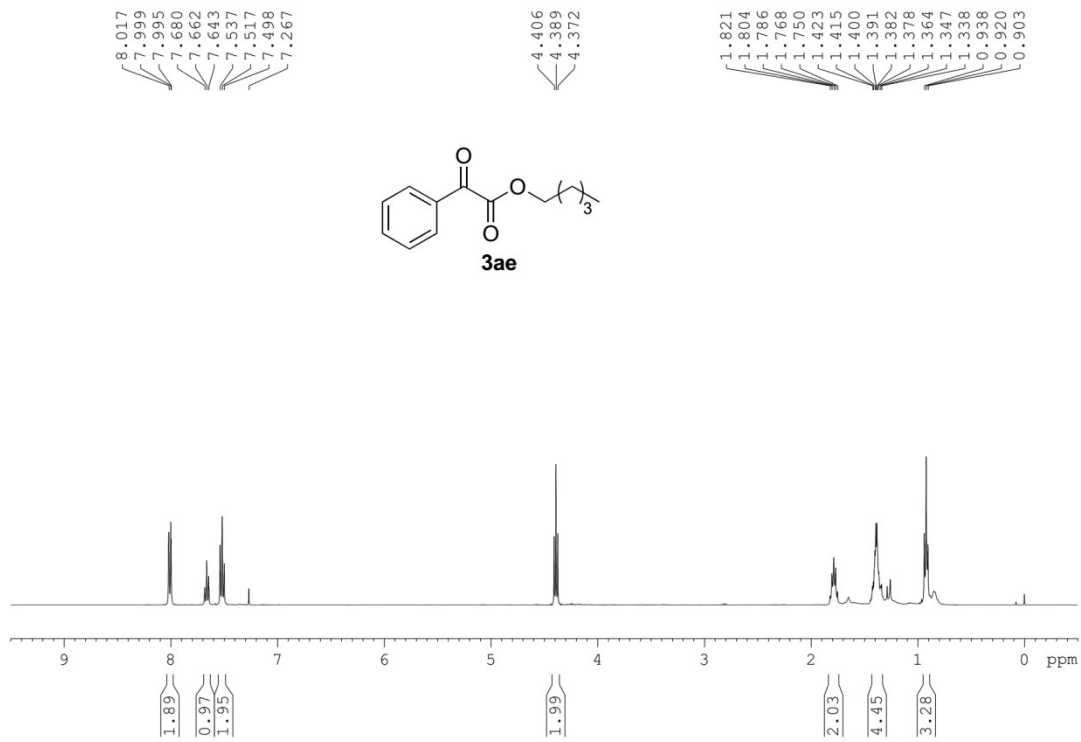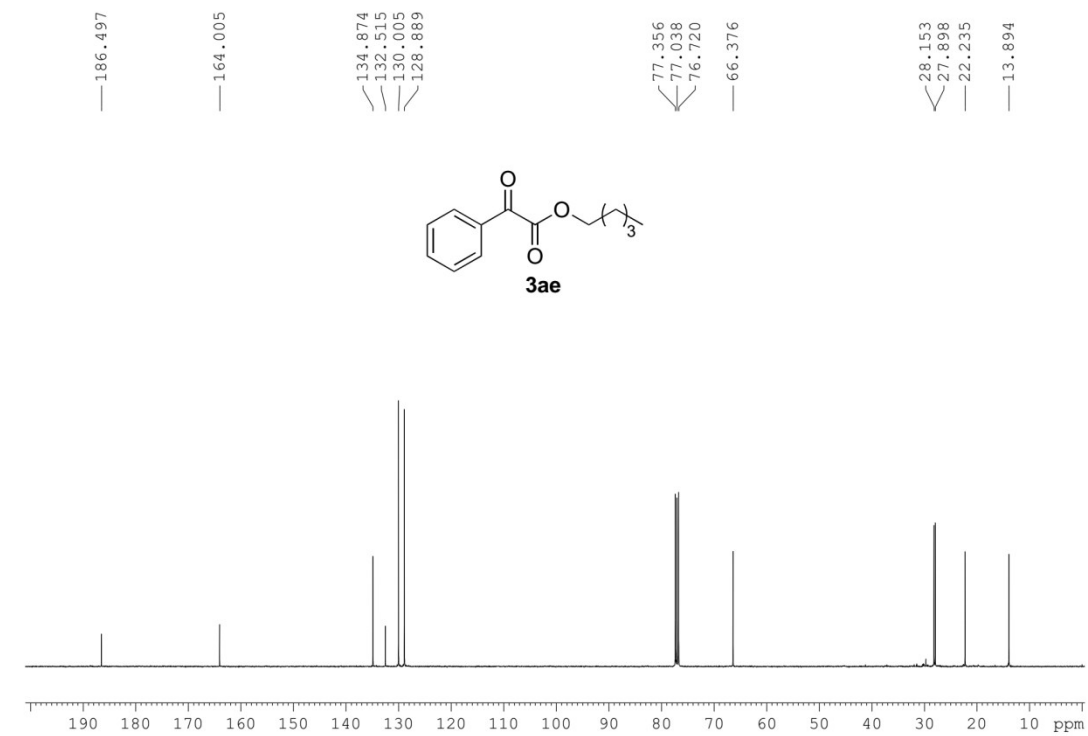



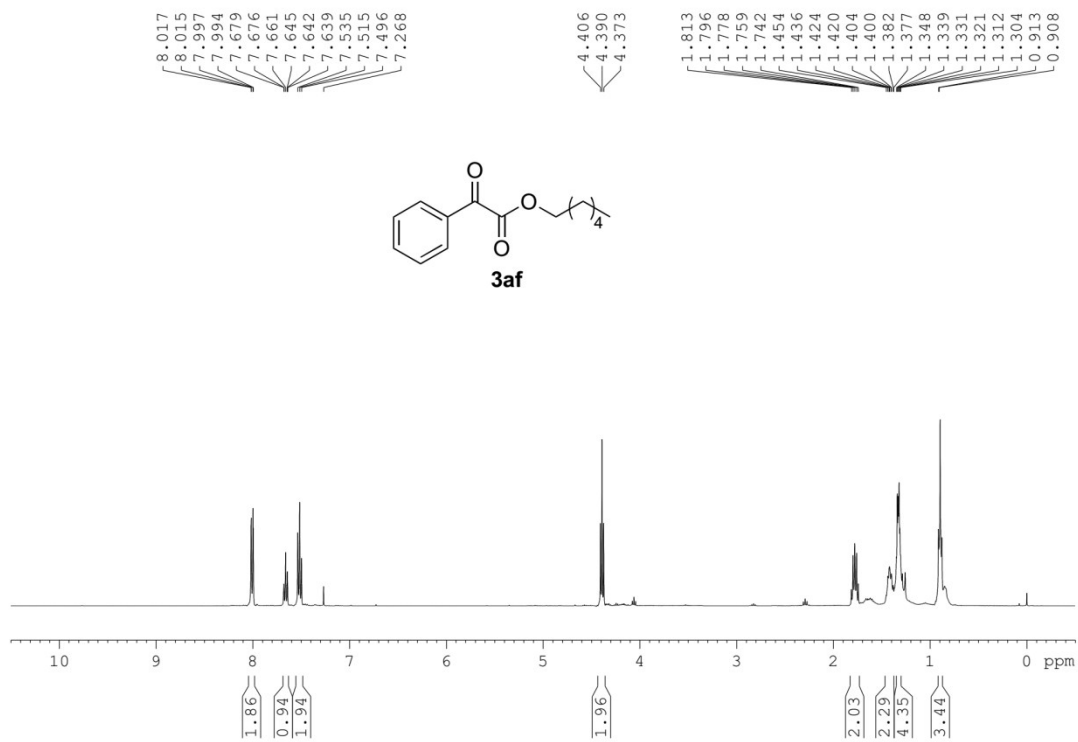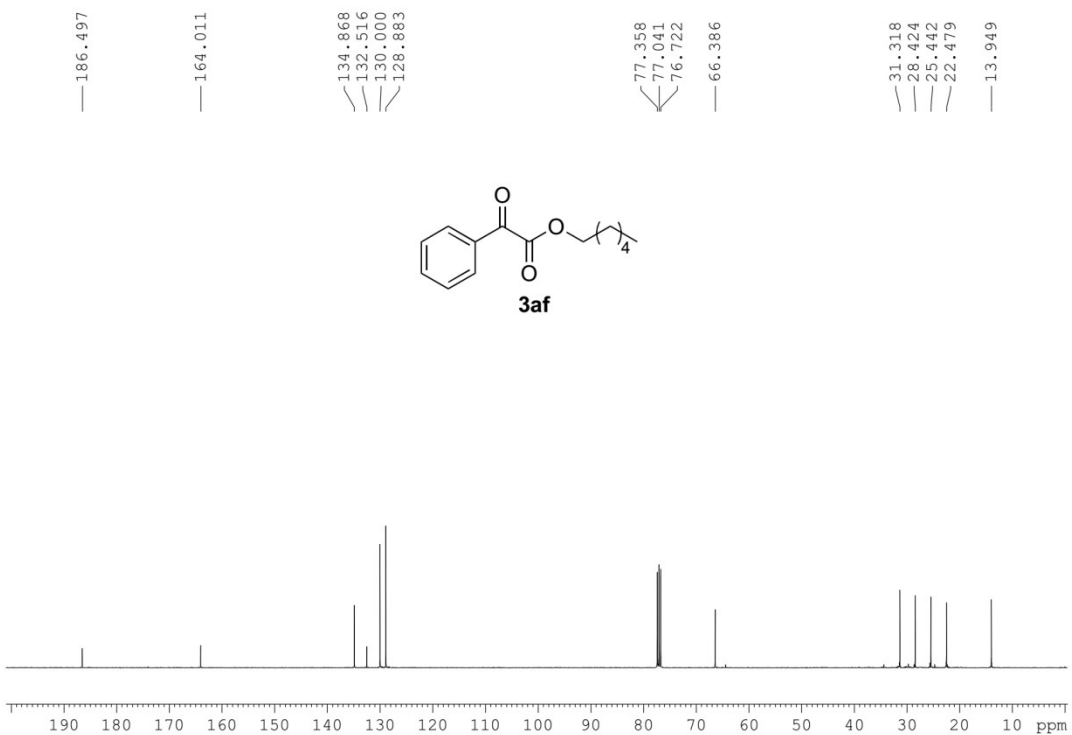

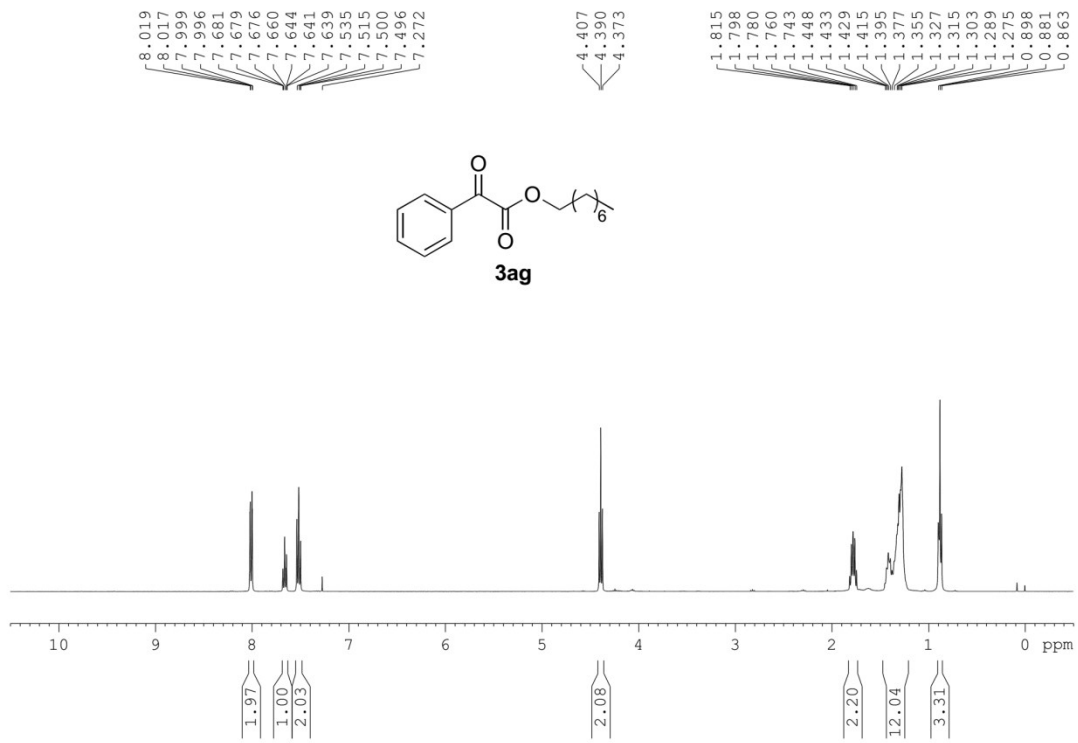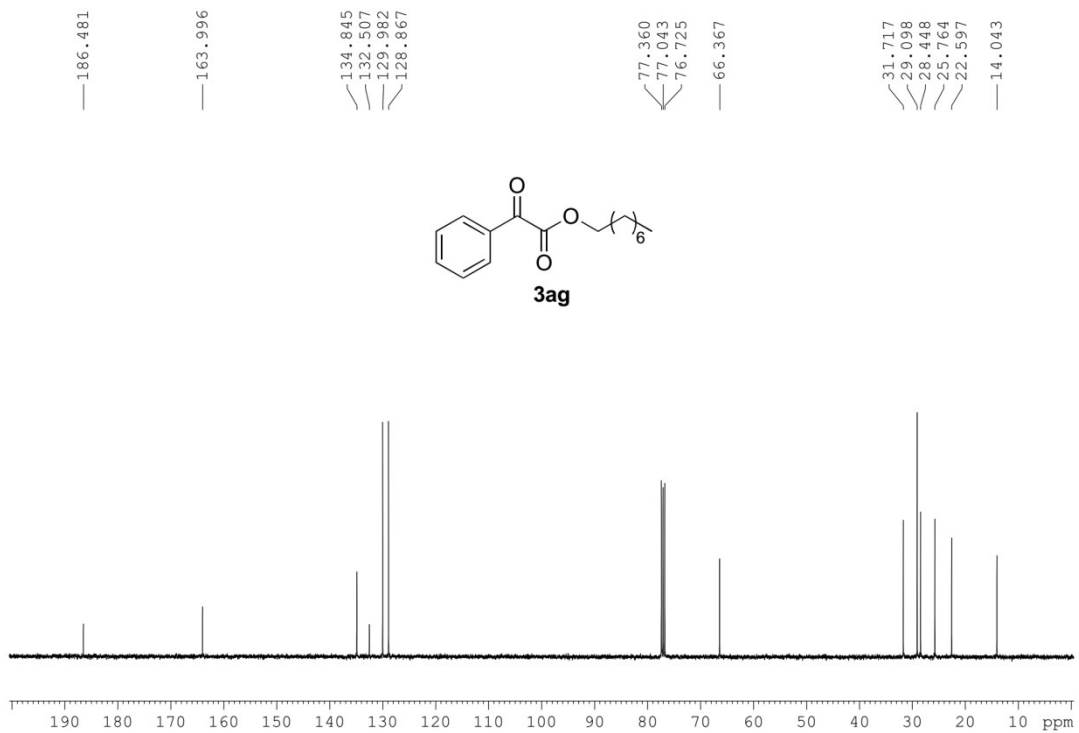

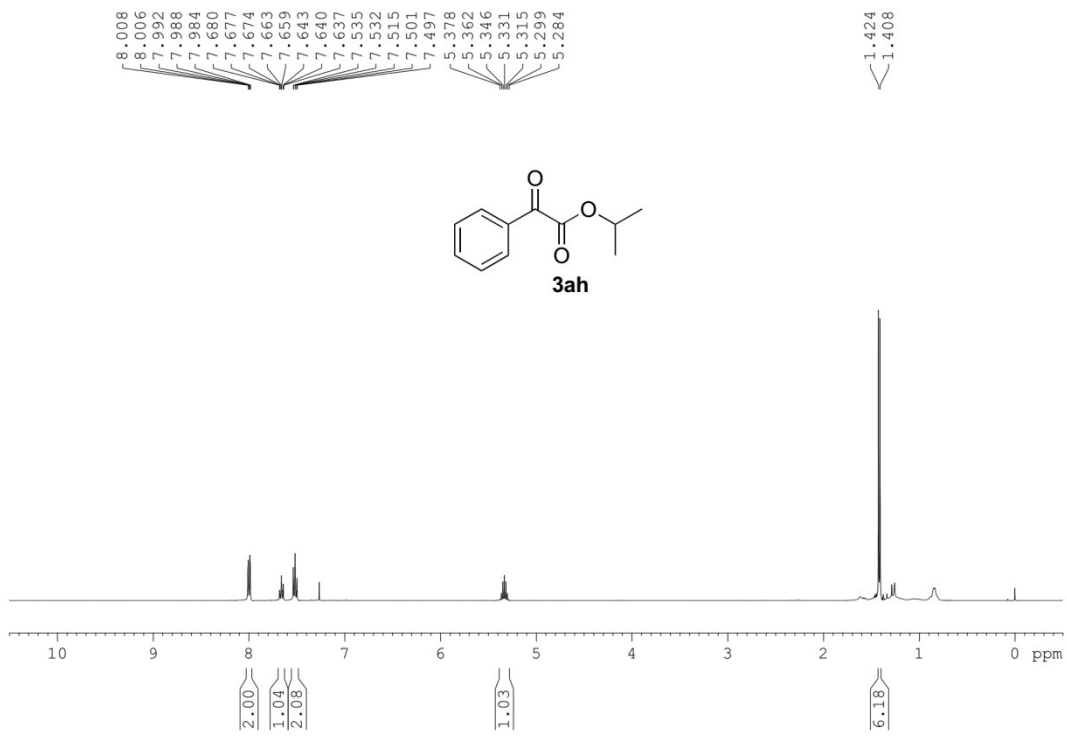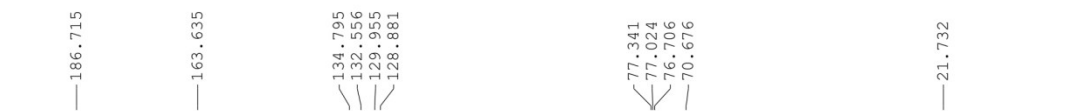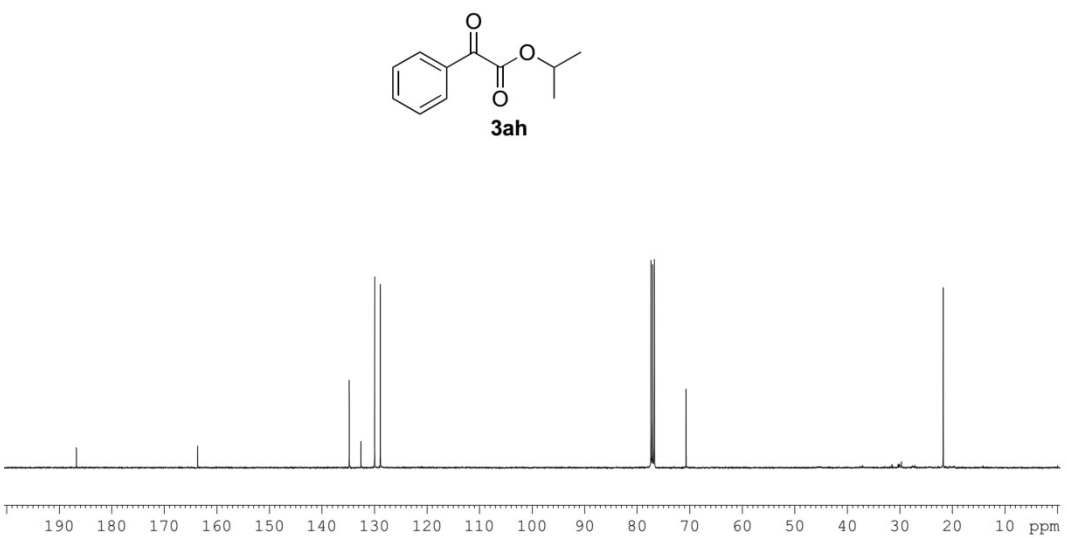

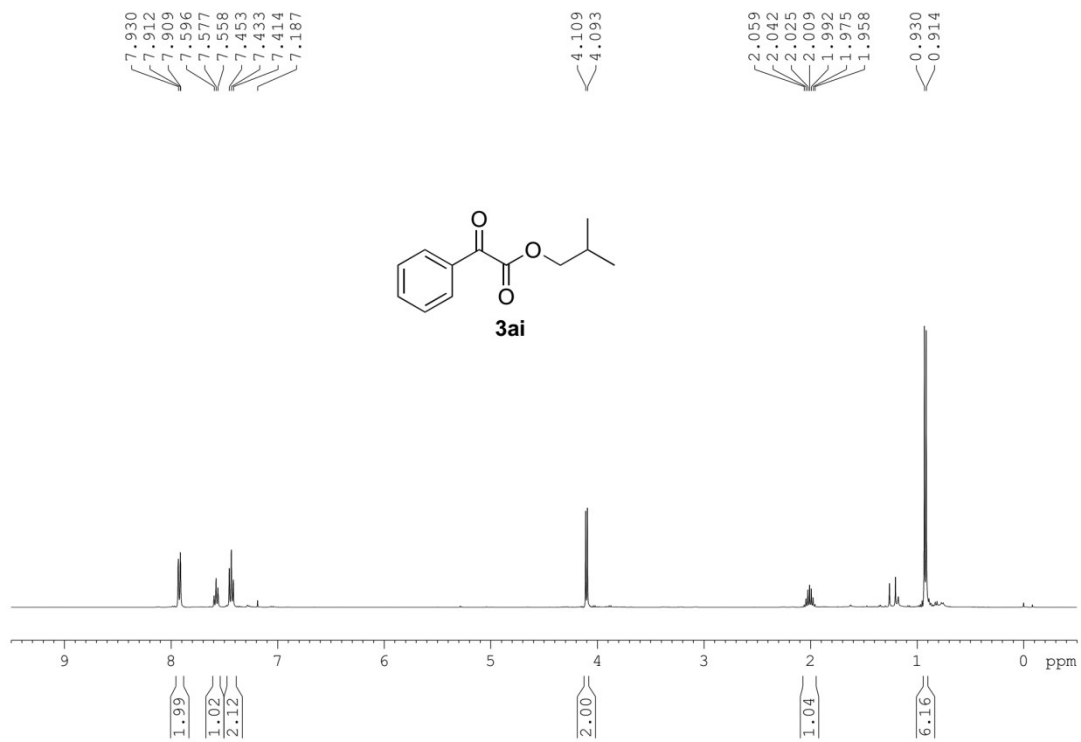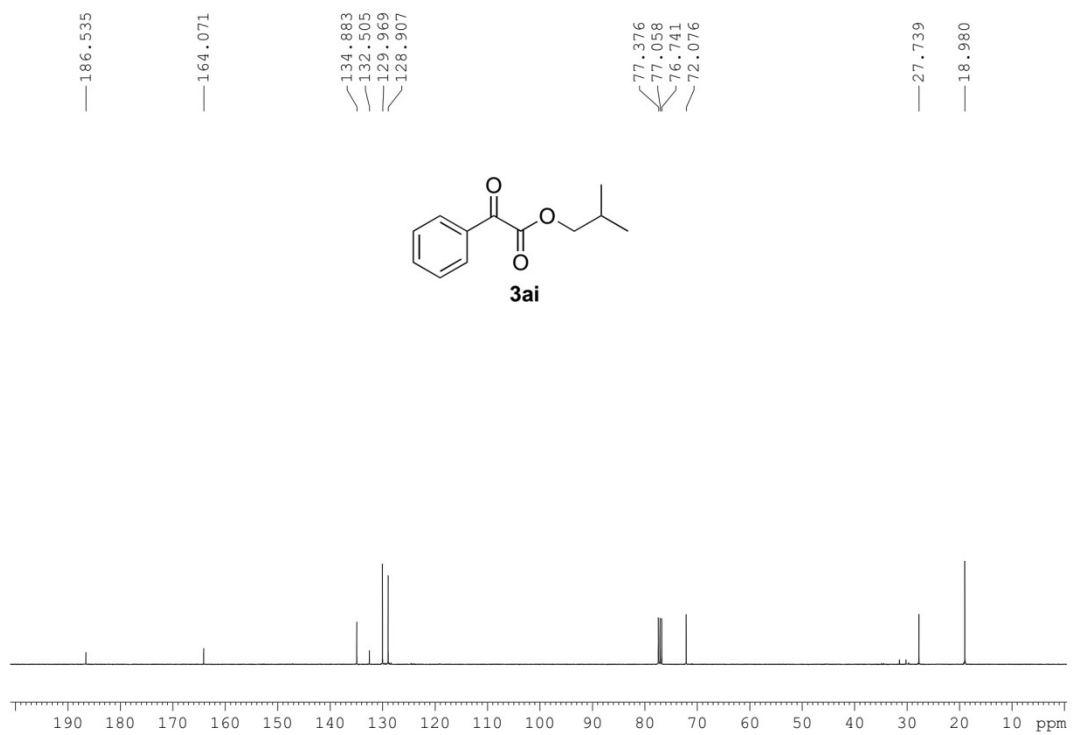

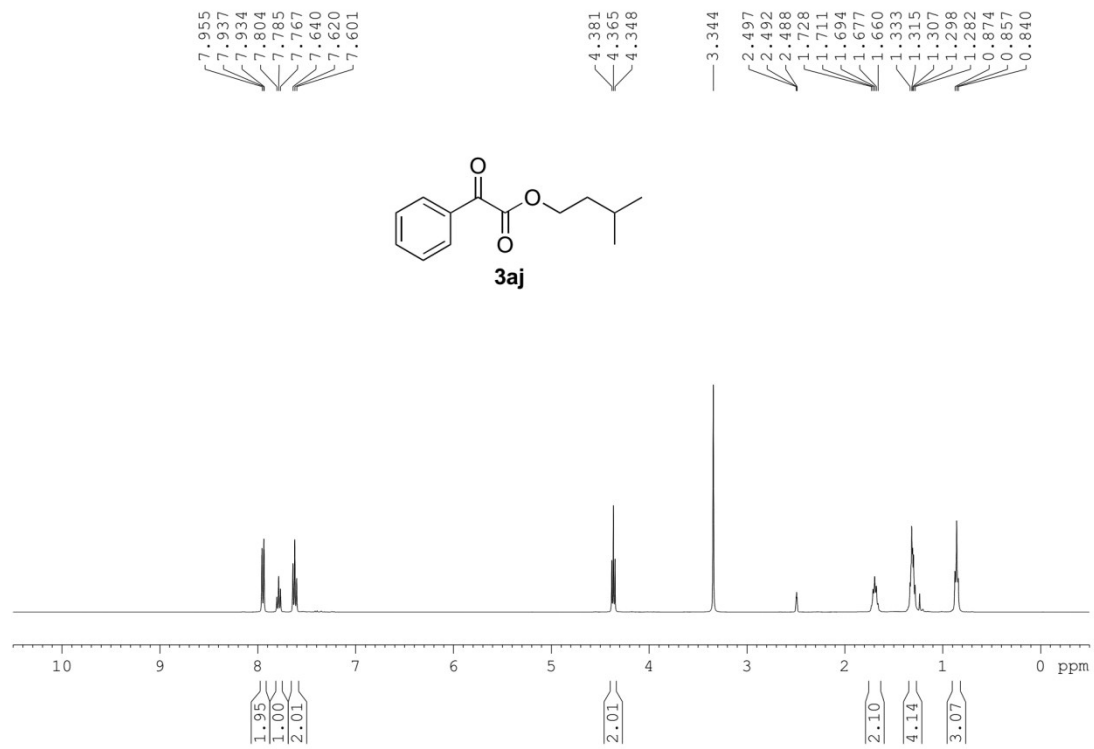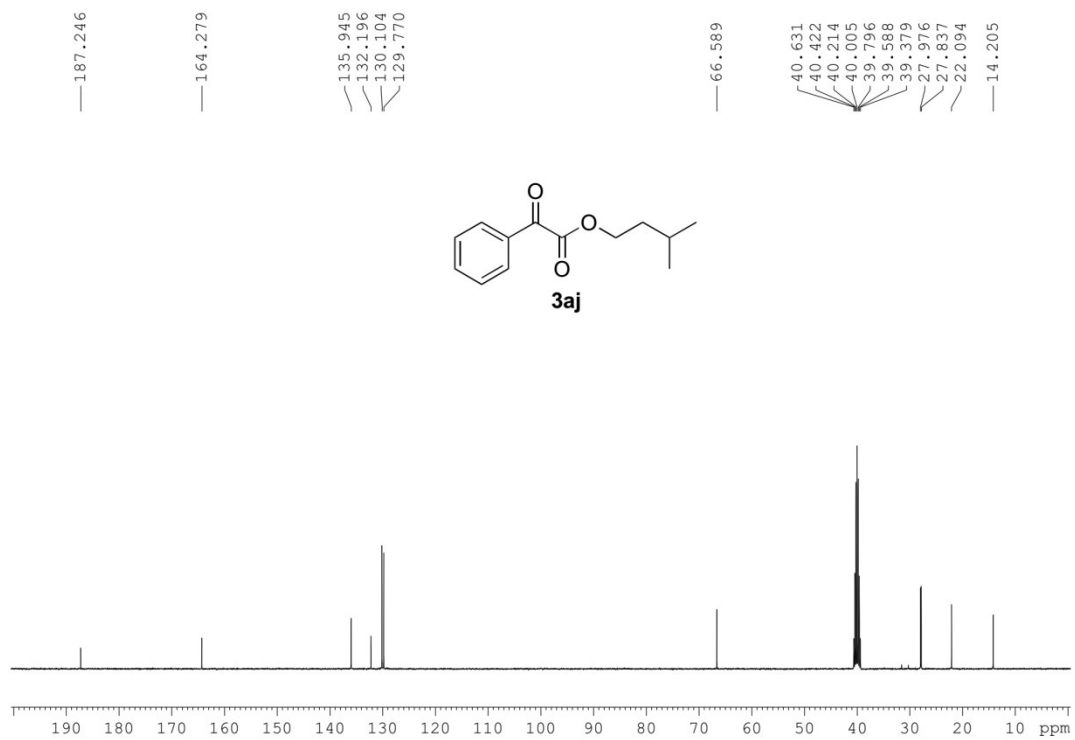

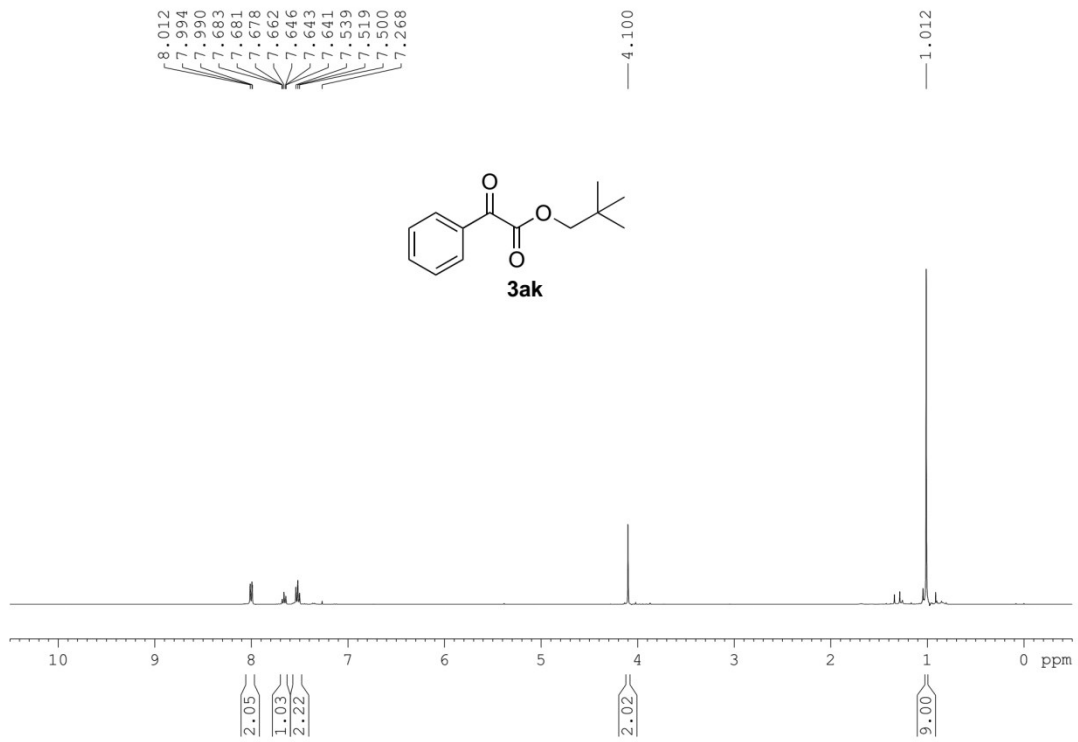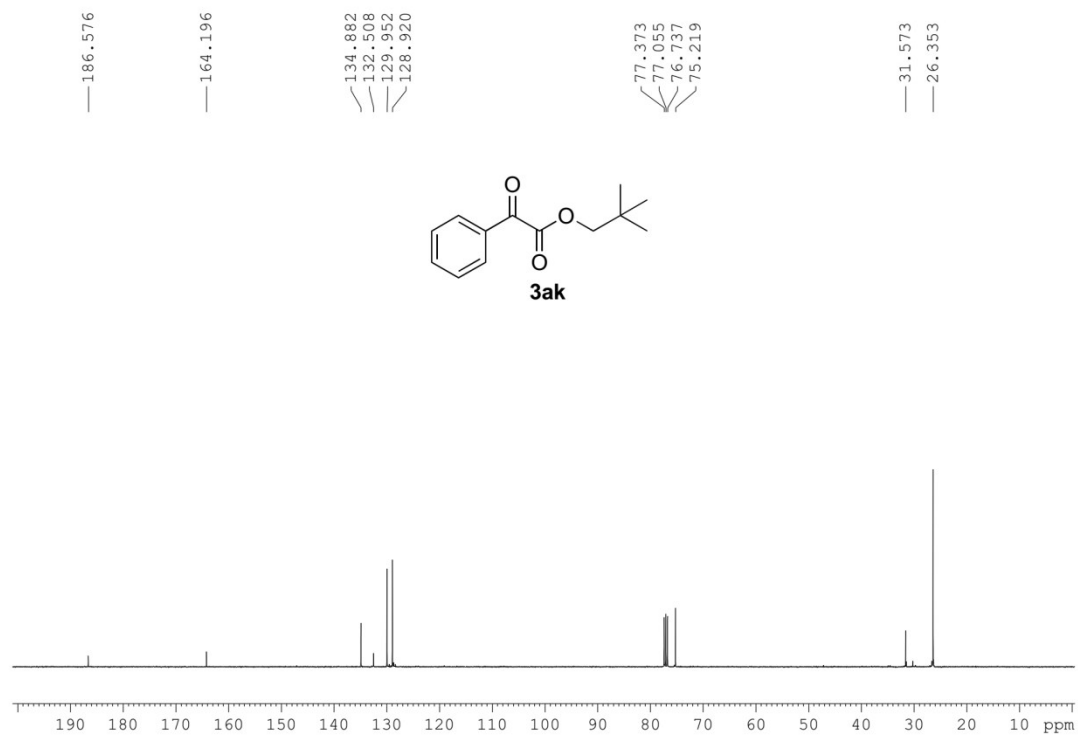

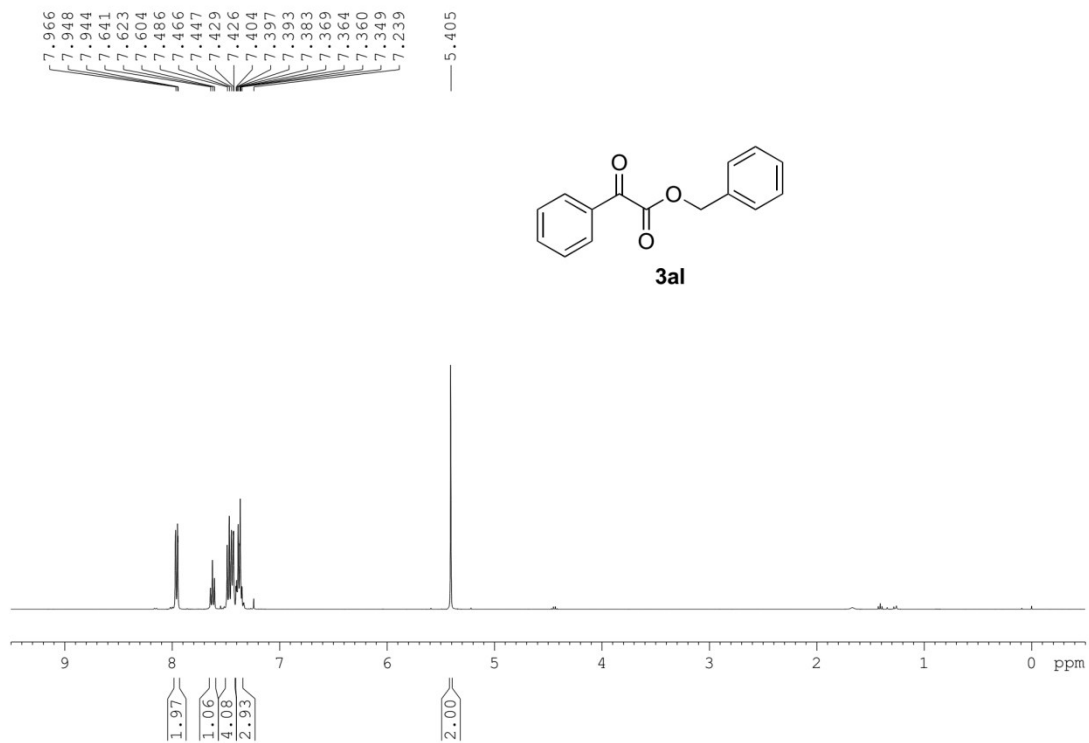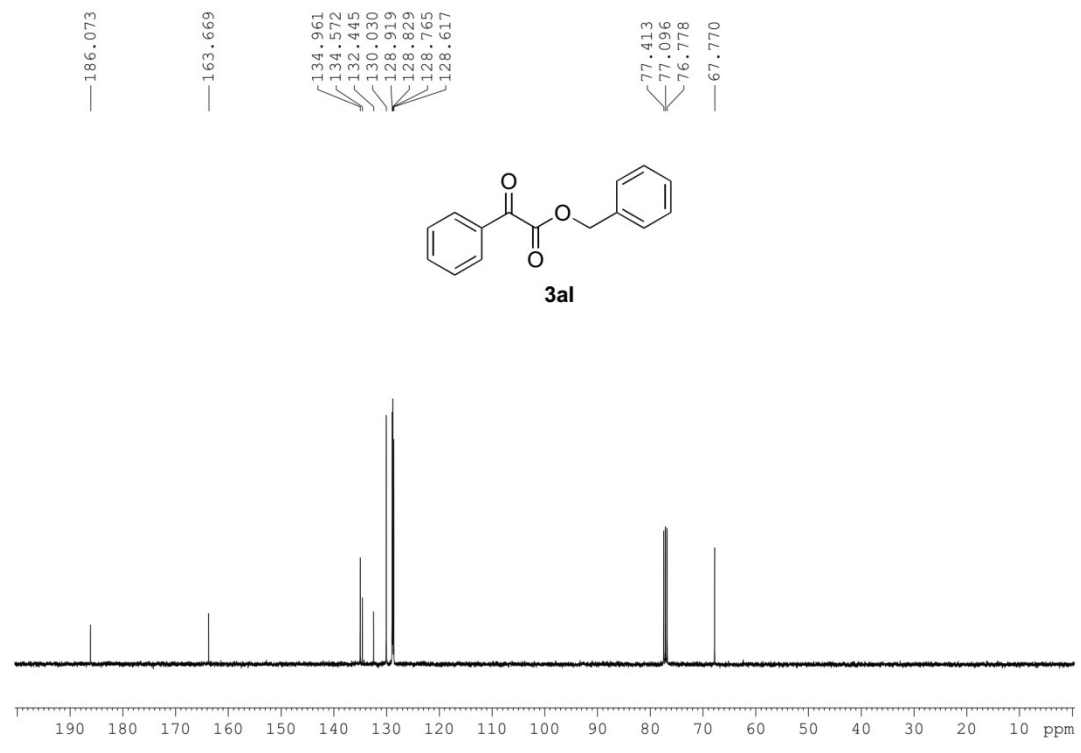

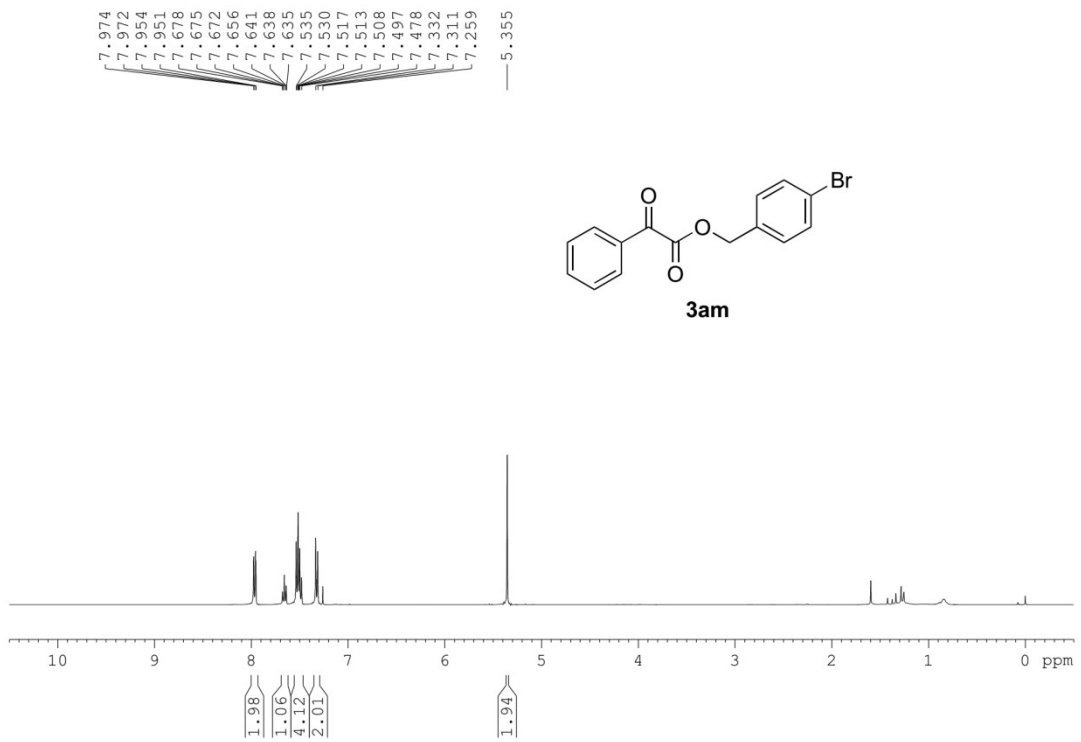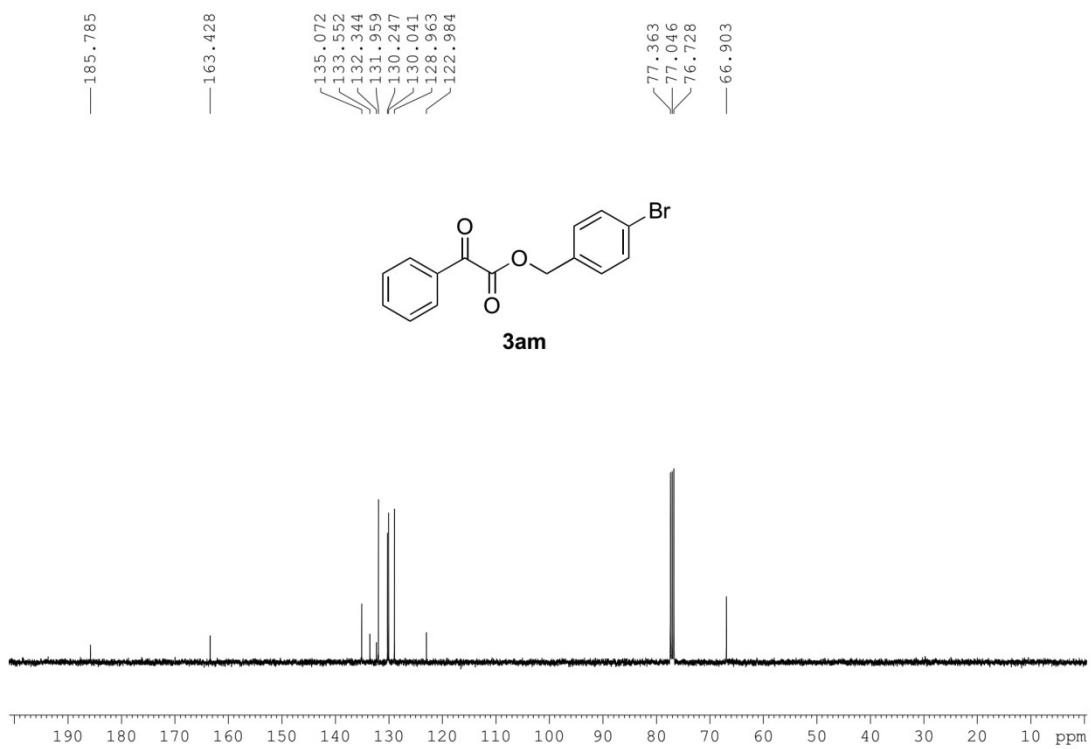



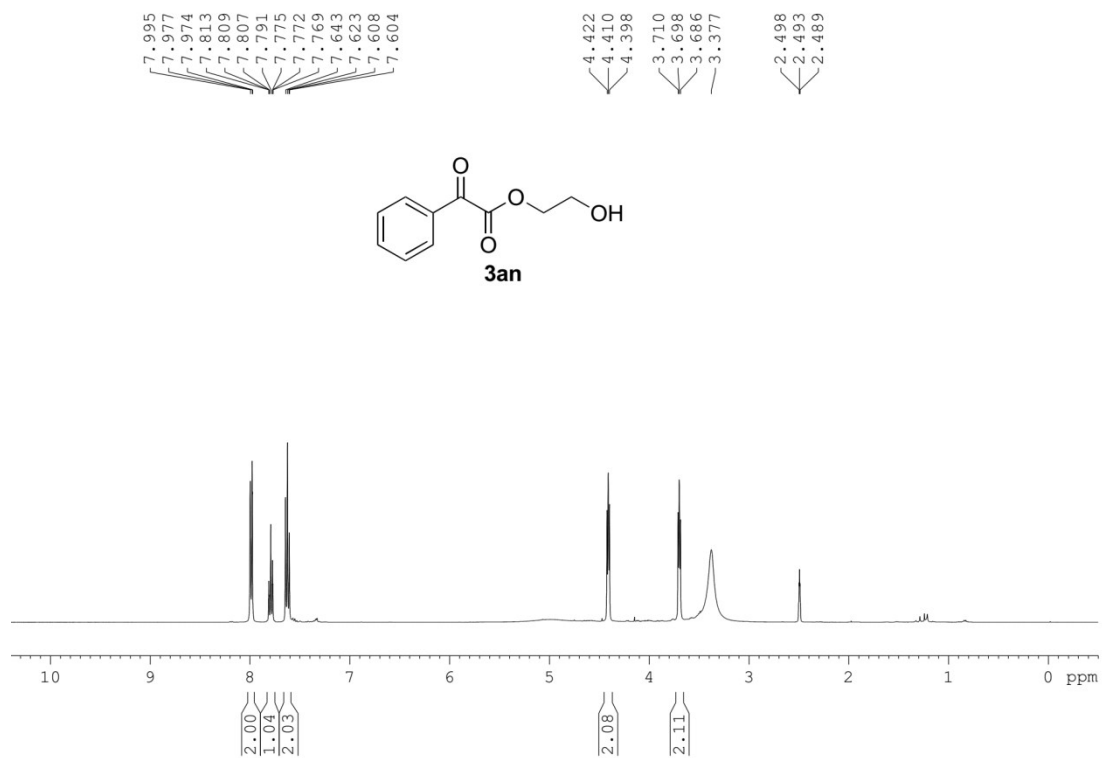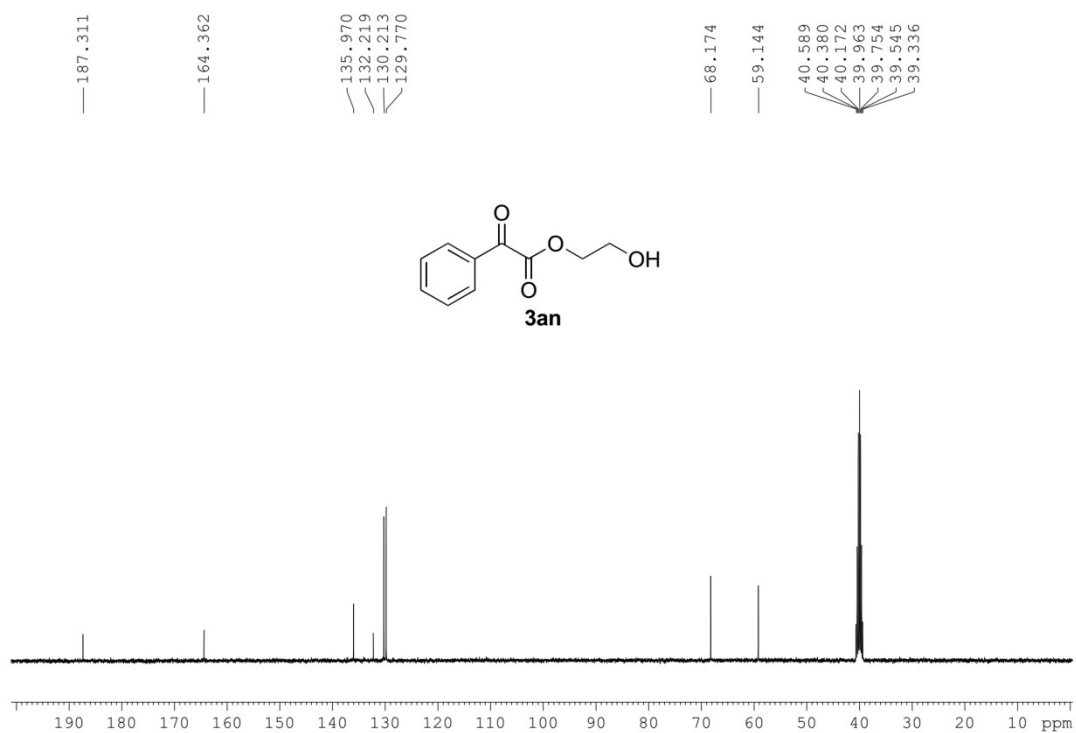

8.027  
8.009  
8.006  
7.876  
7.873  
7.858  
7.842  
7.639  
7.518  
7.498  
7.479  
7.273

4.749

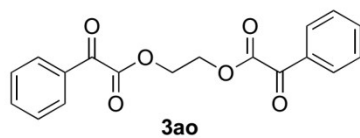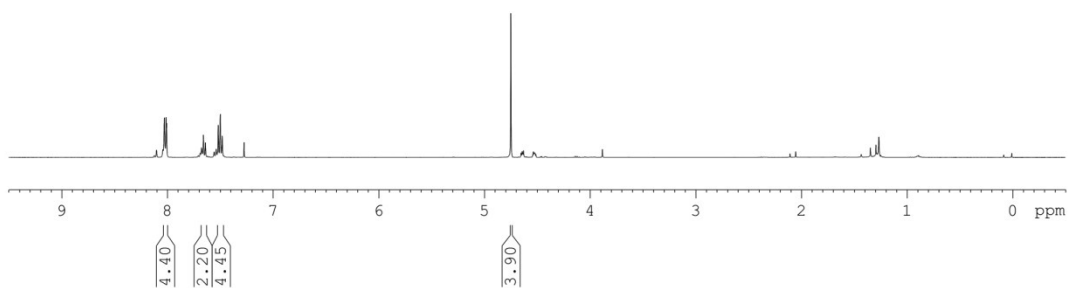

185.529

163.245

135.117  
132.193  
130.105  
128.979

77.341  
77.024  
76.706

62.974

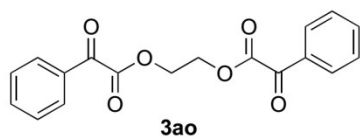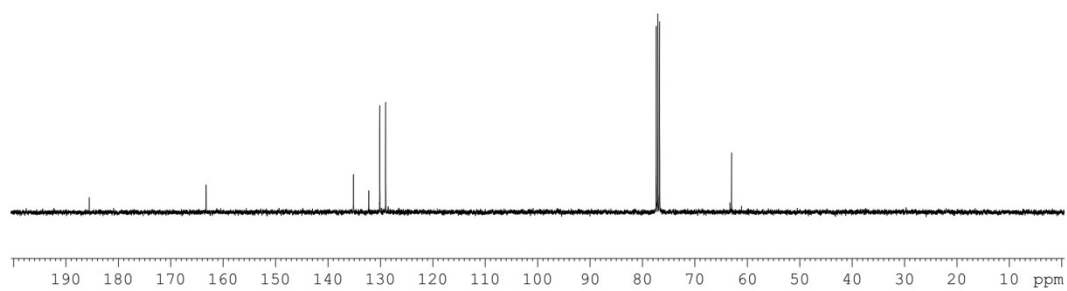

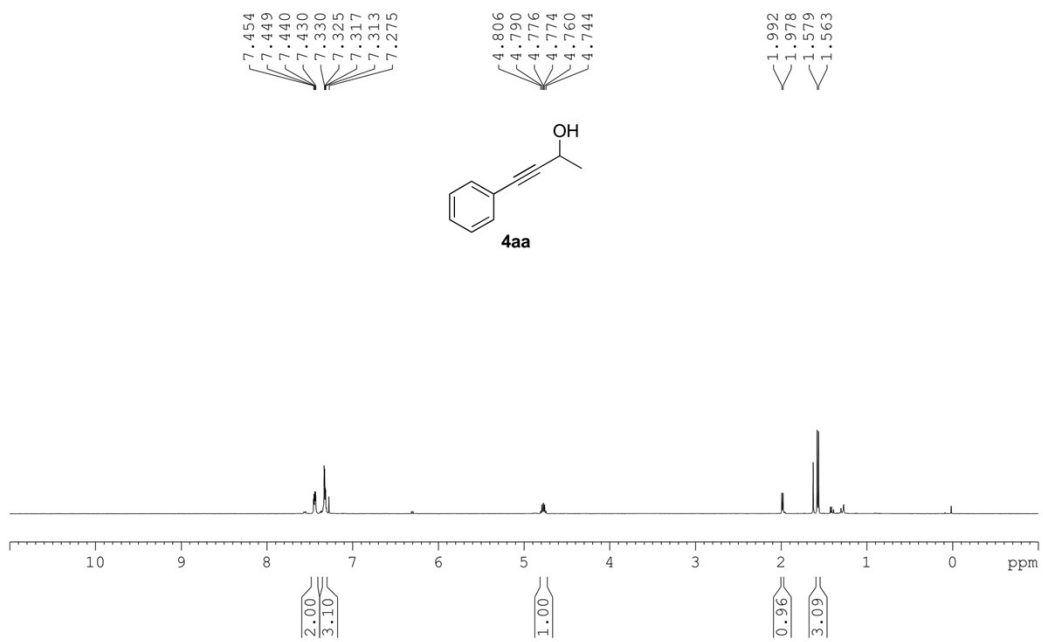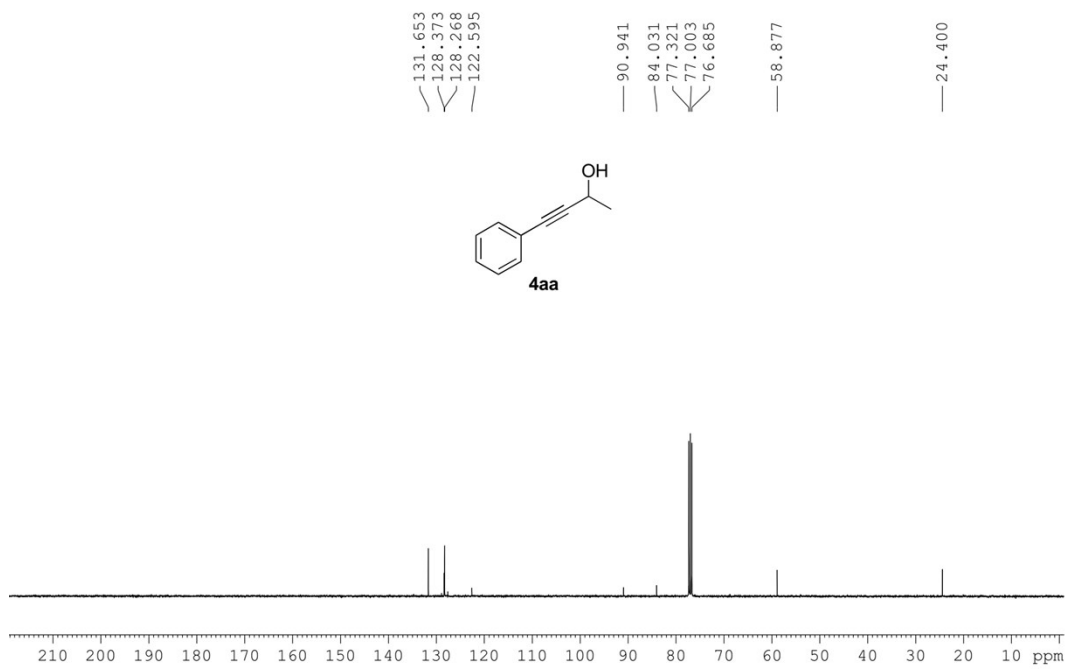

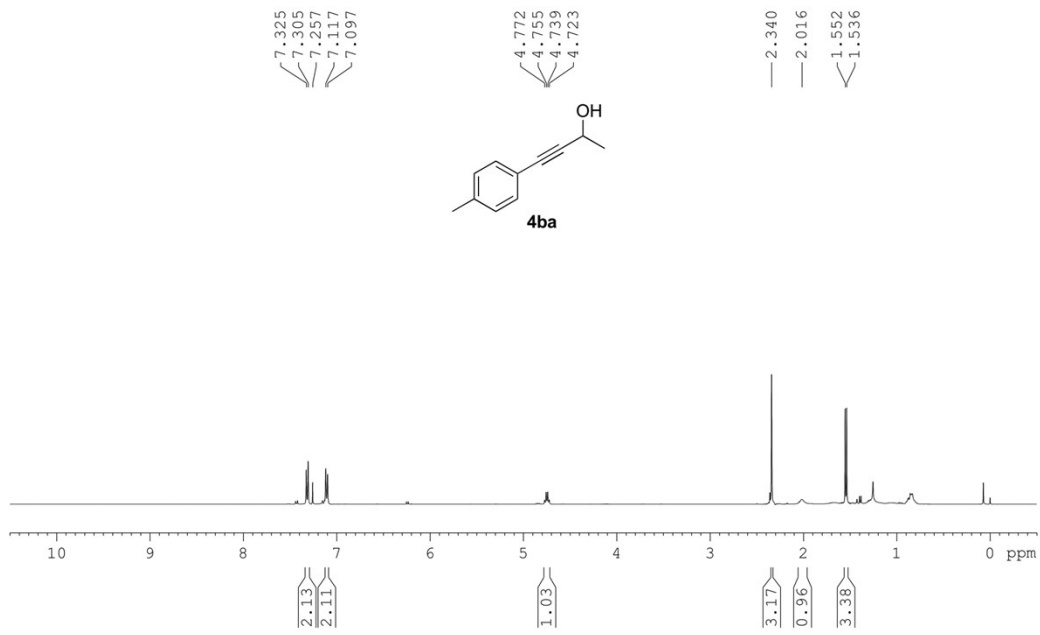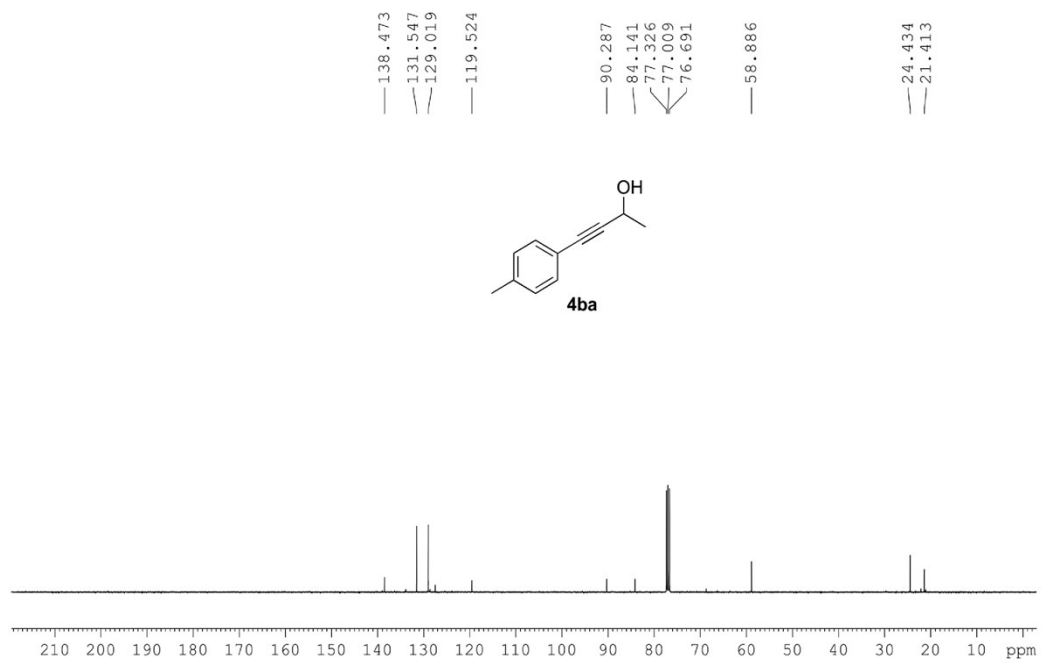

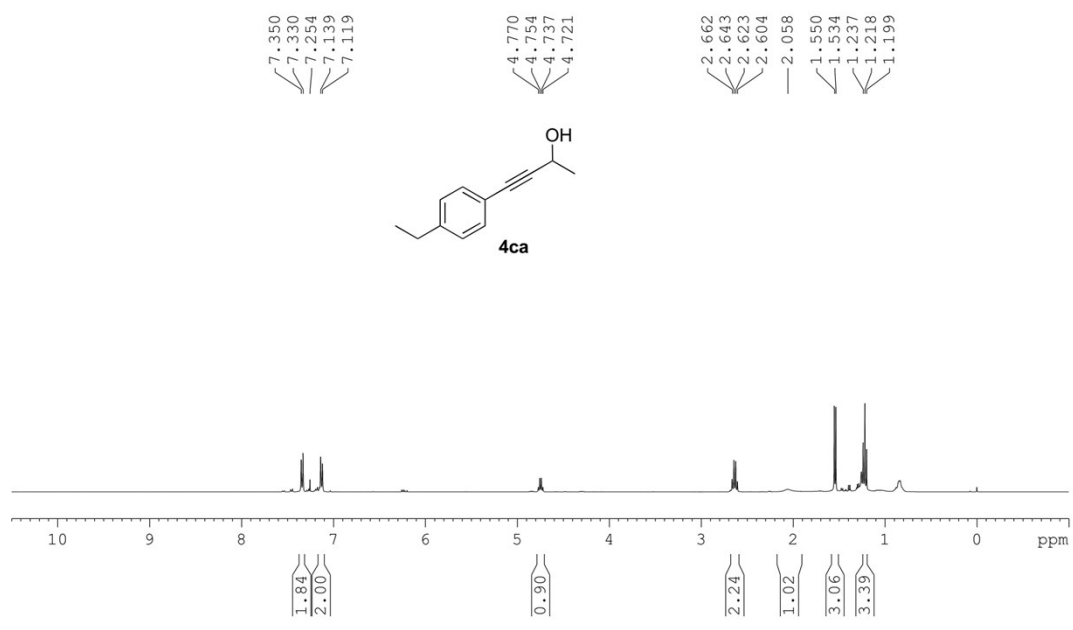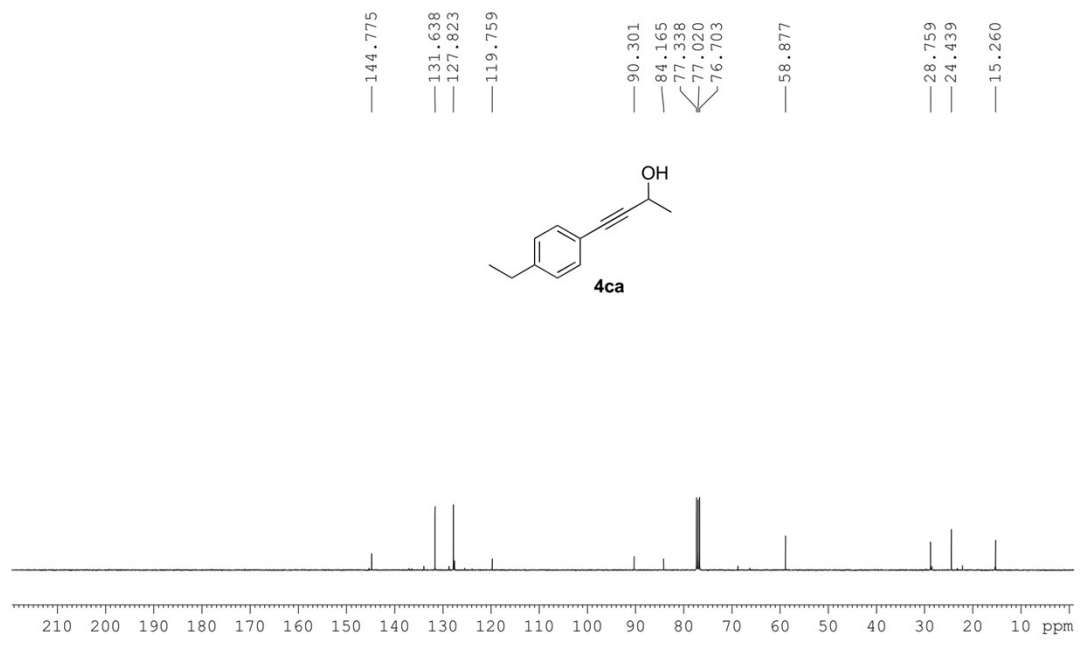

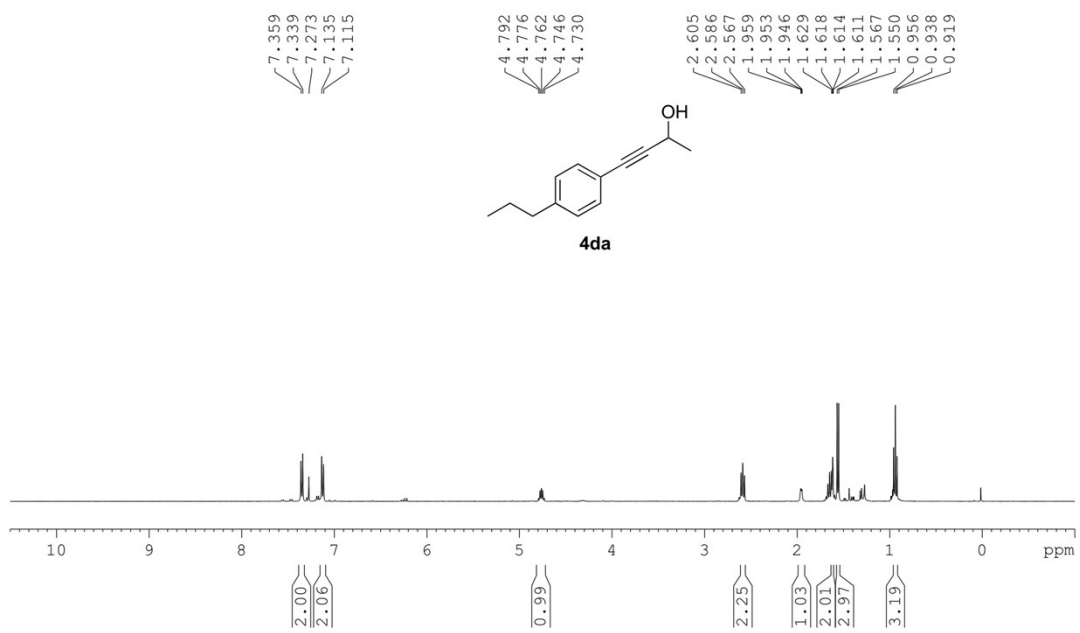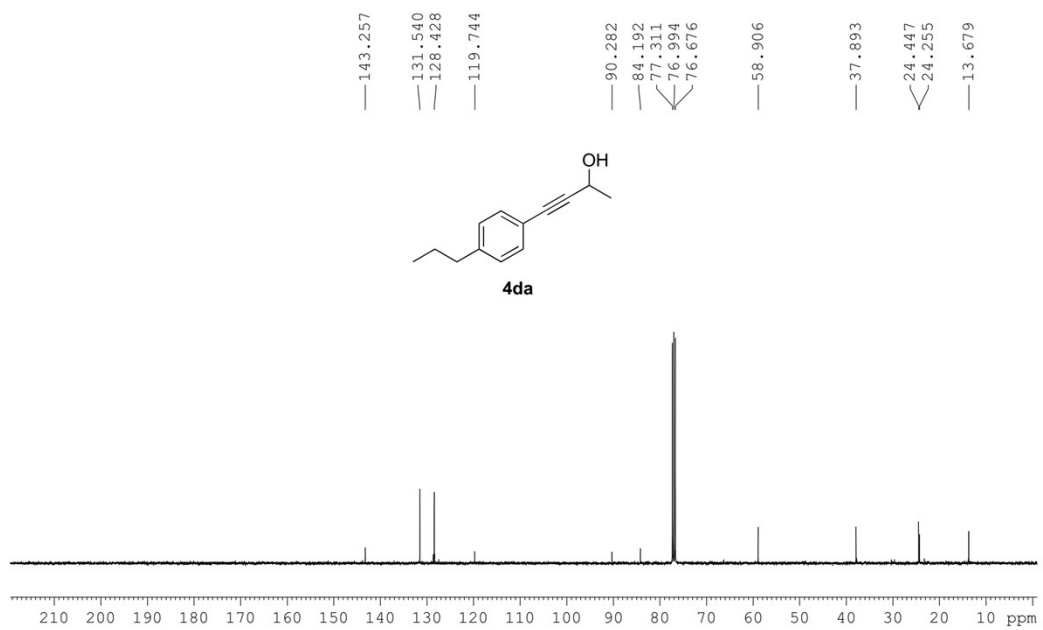

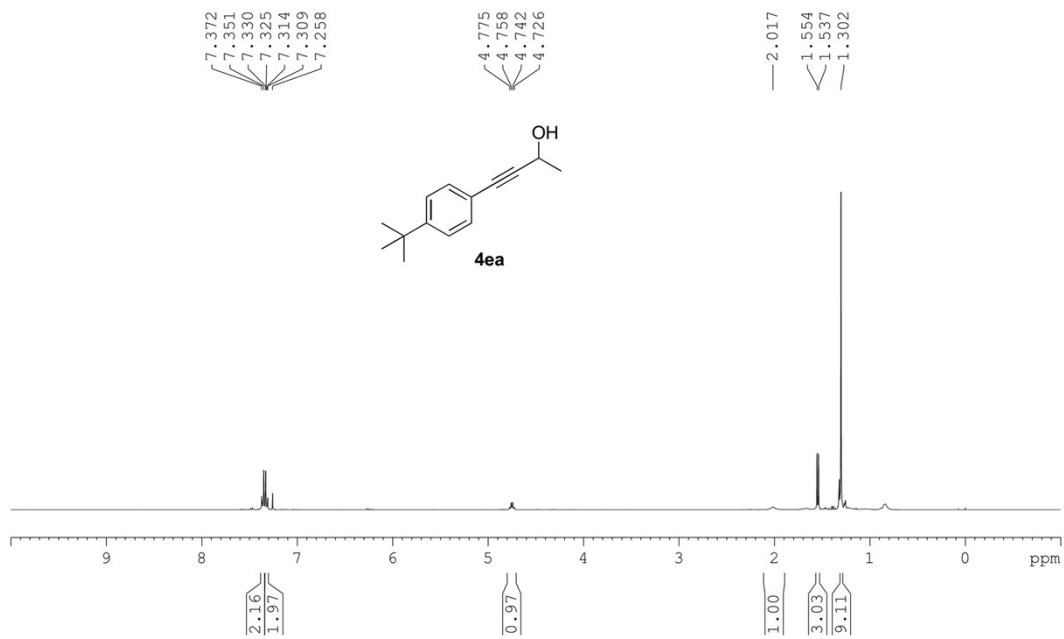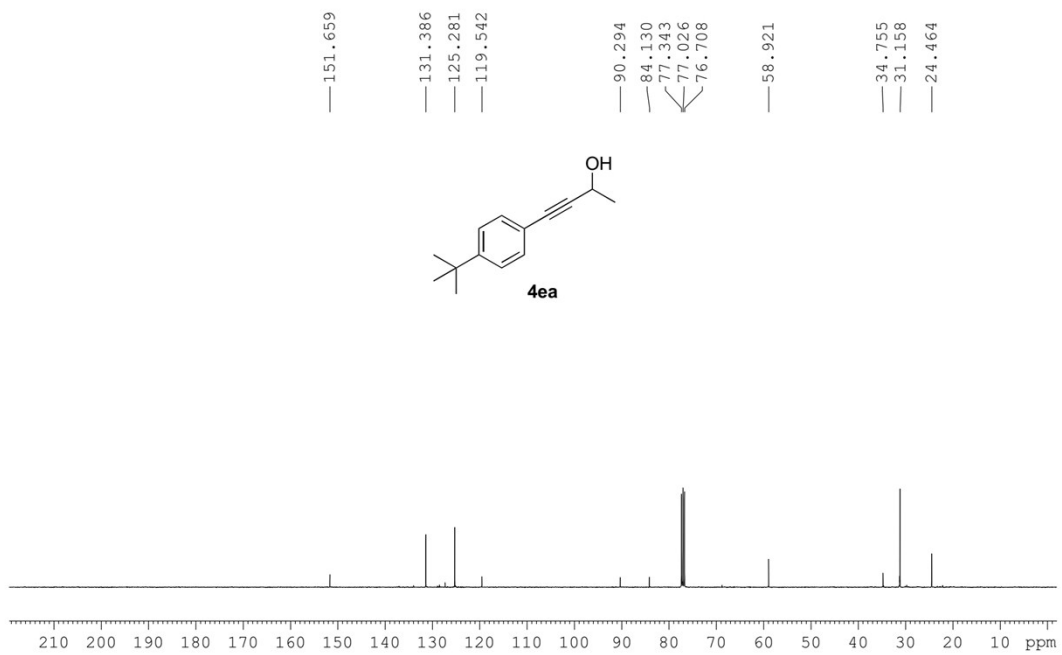

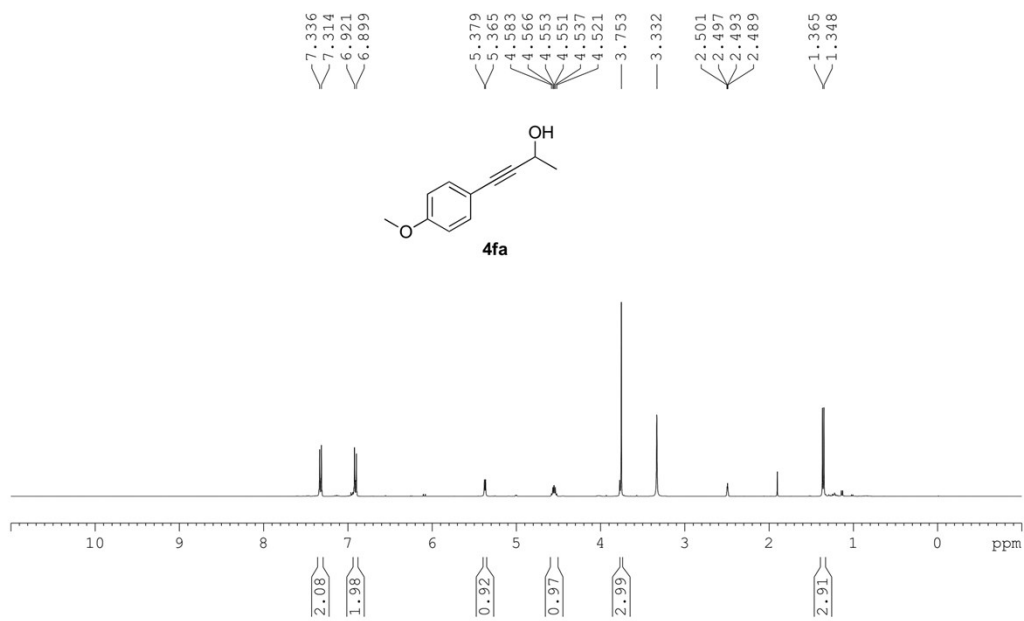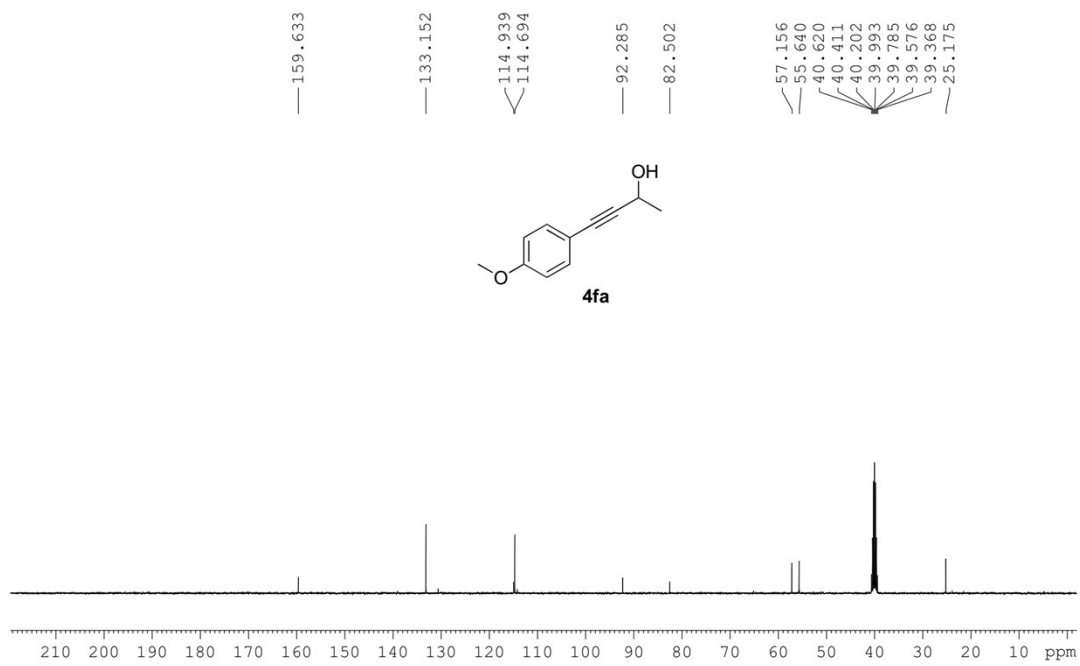



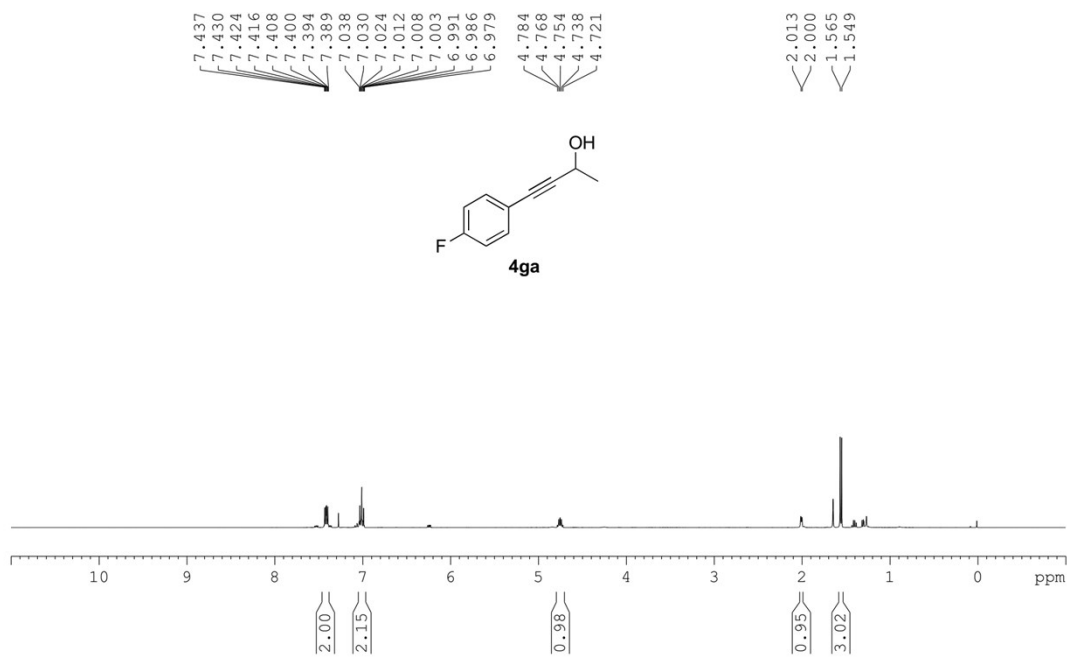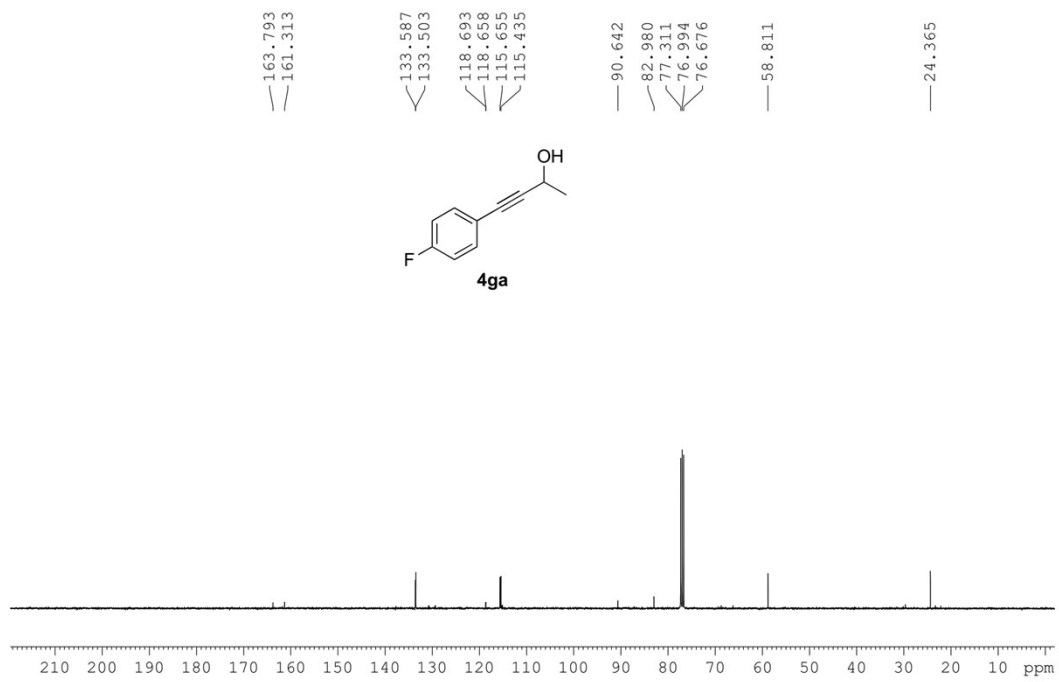

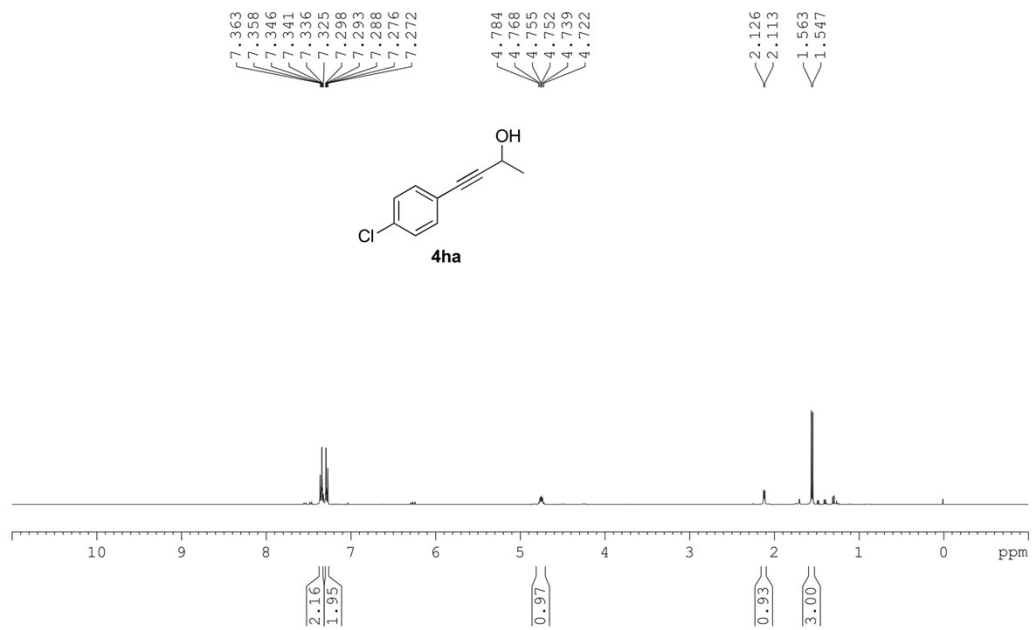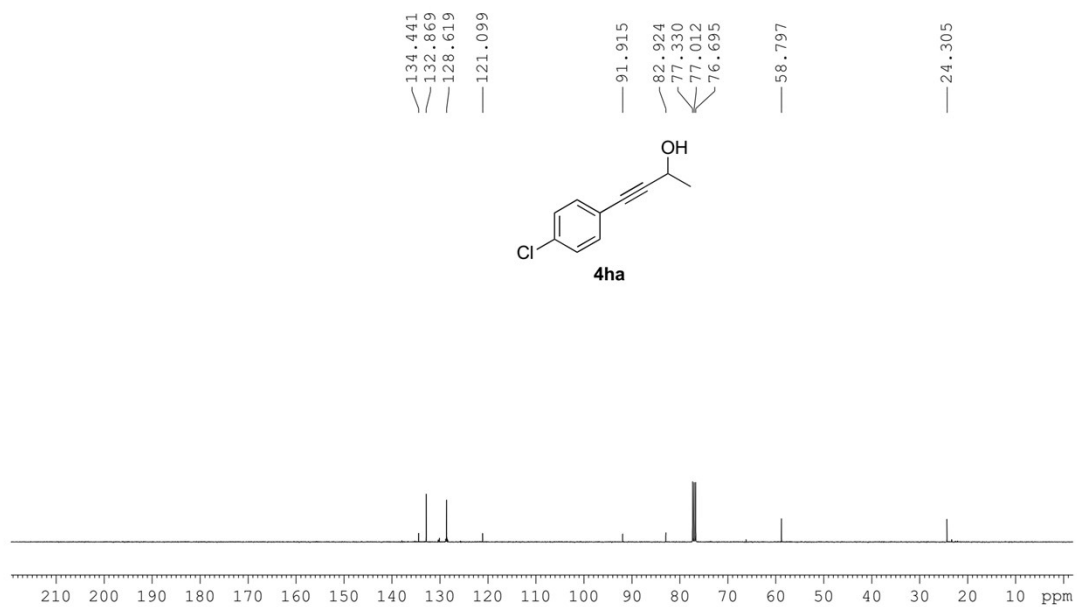

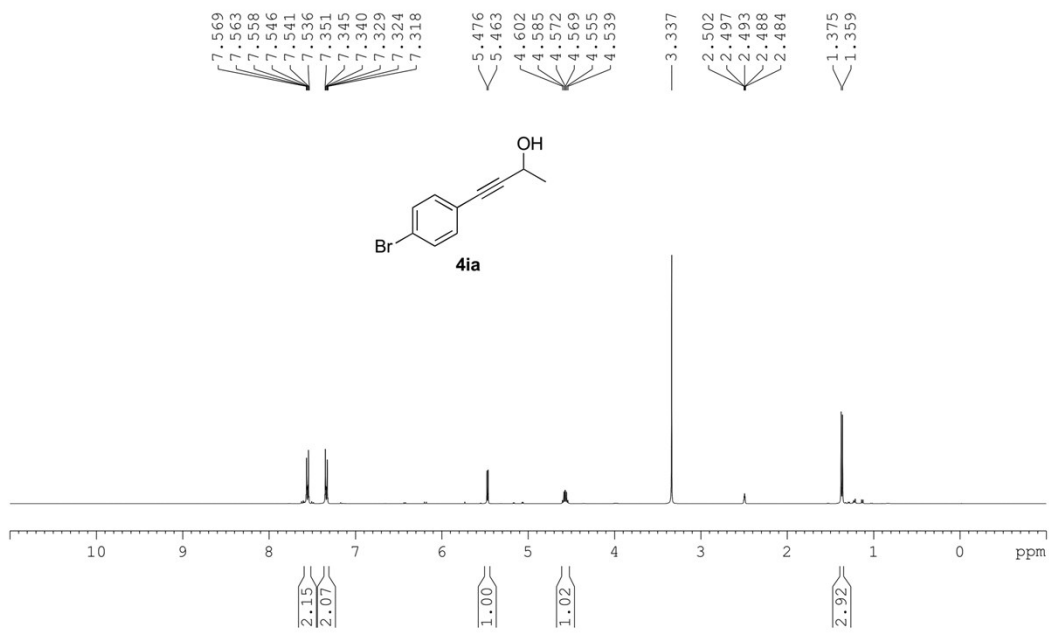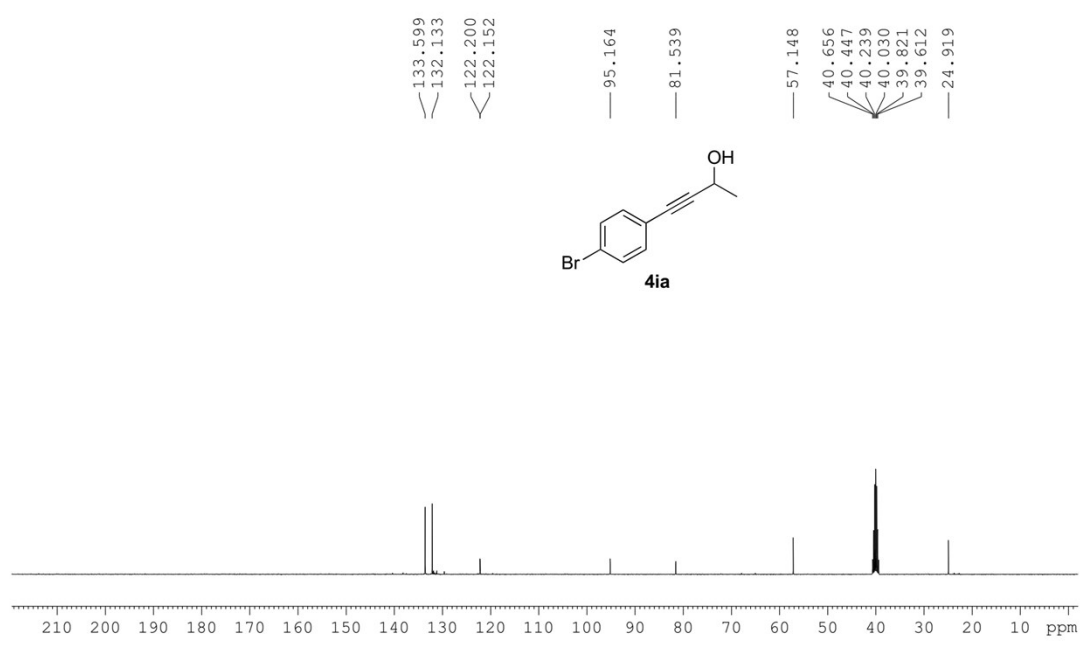

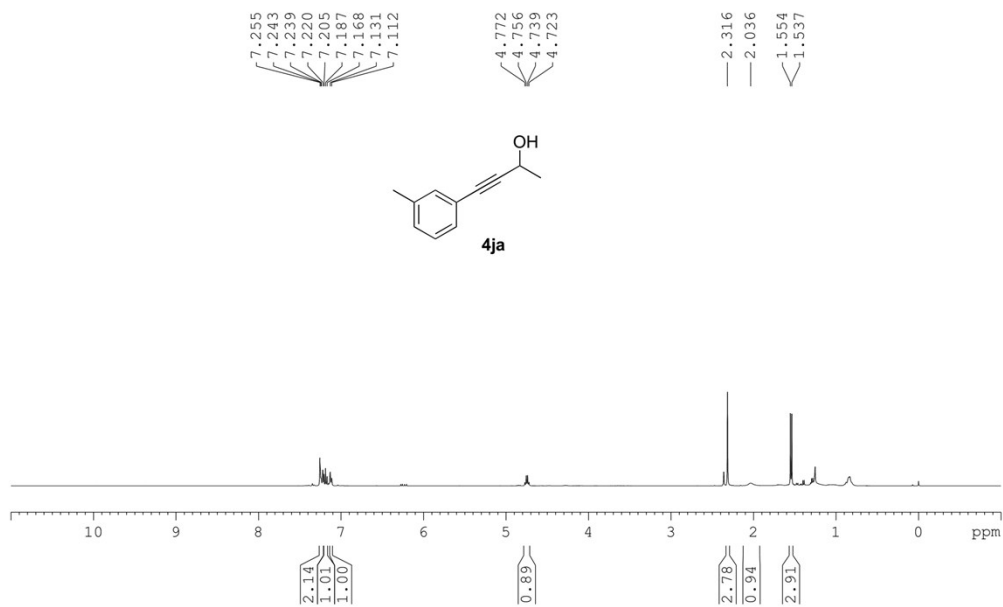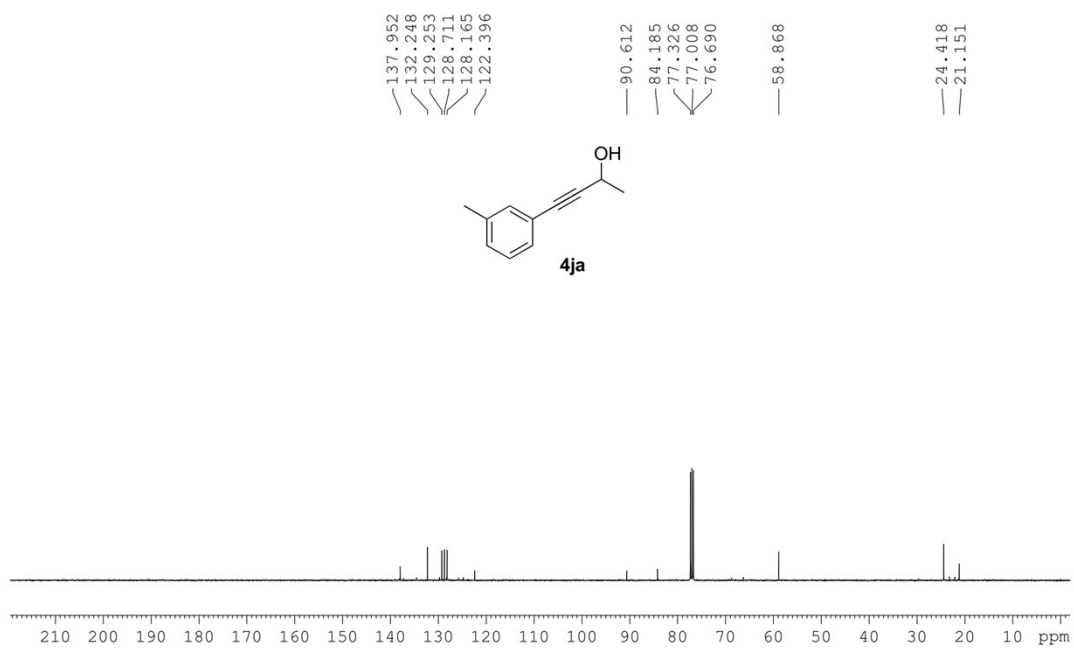

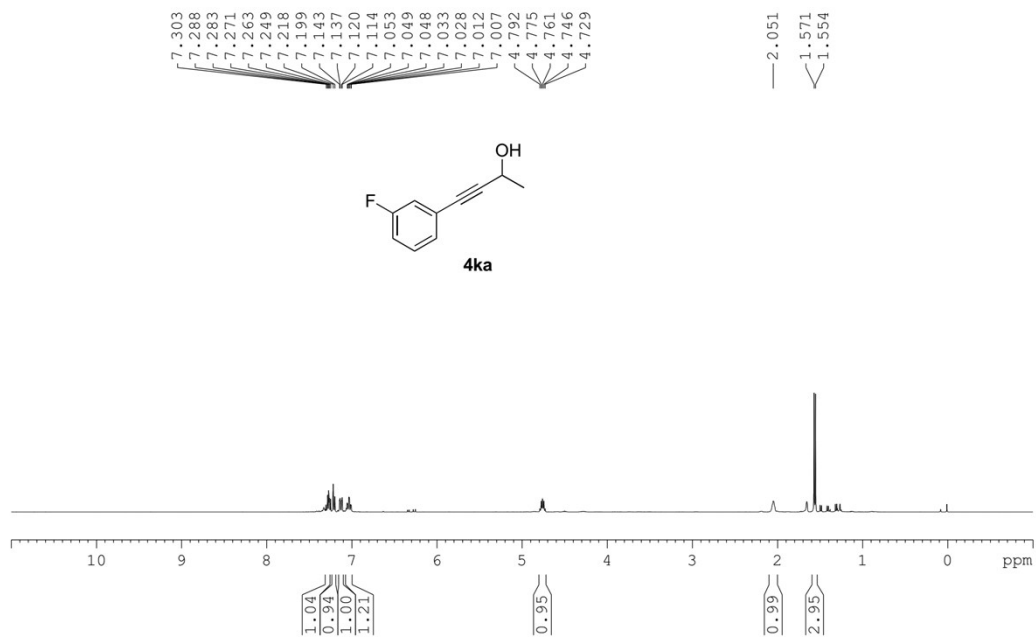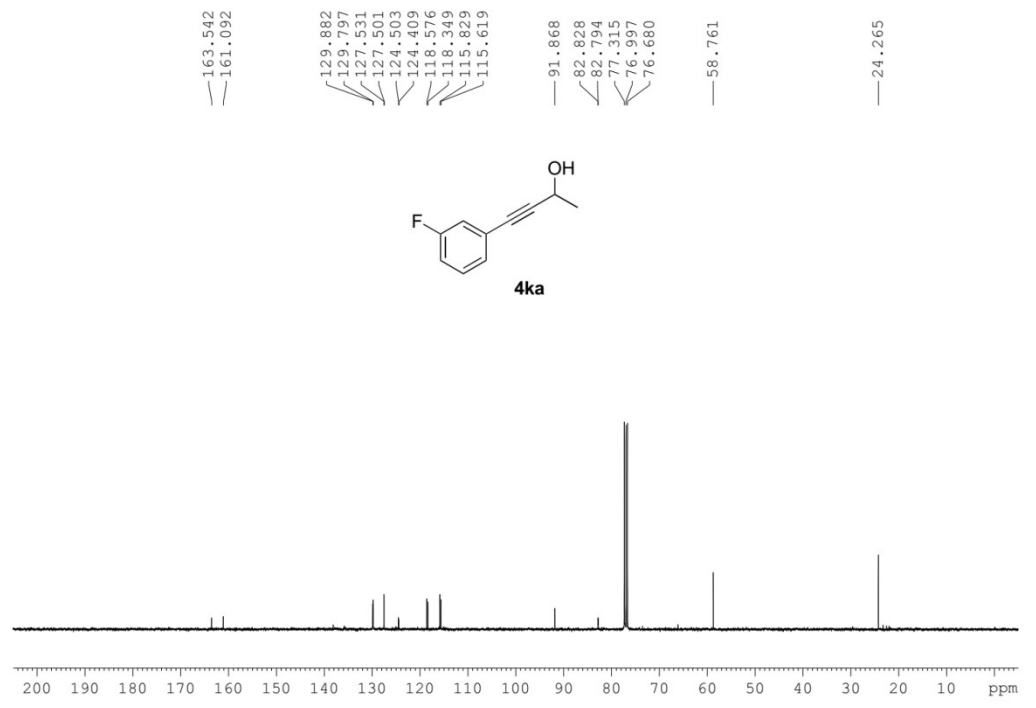

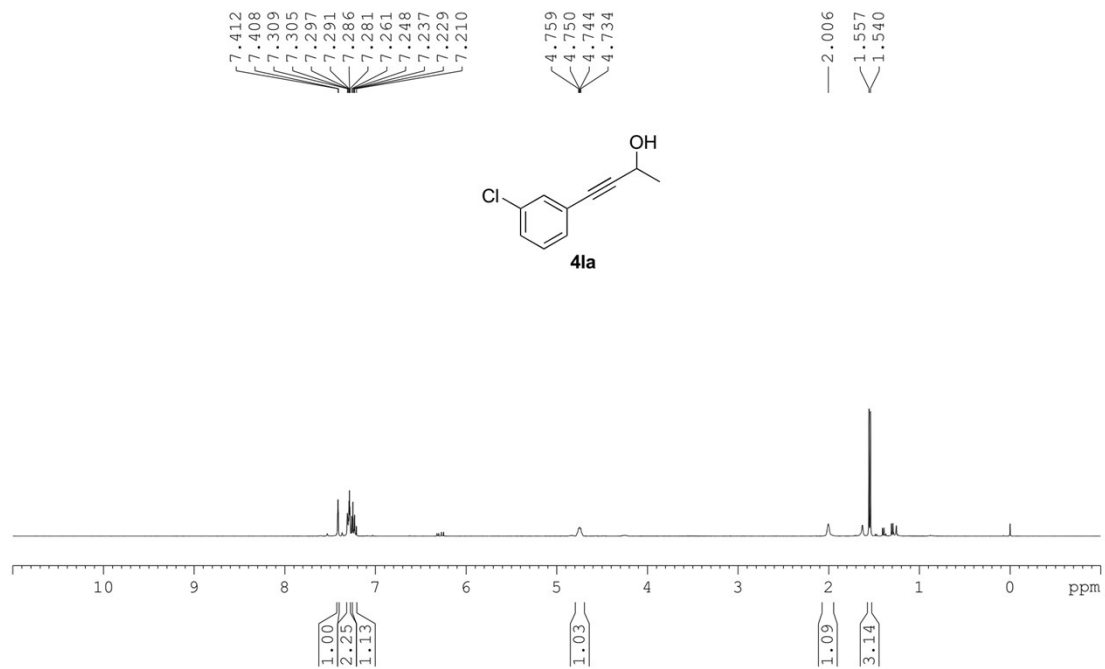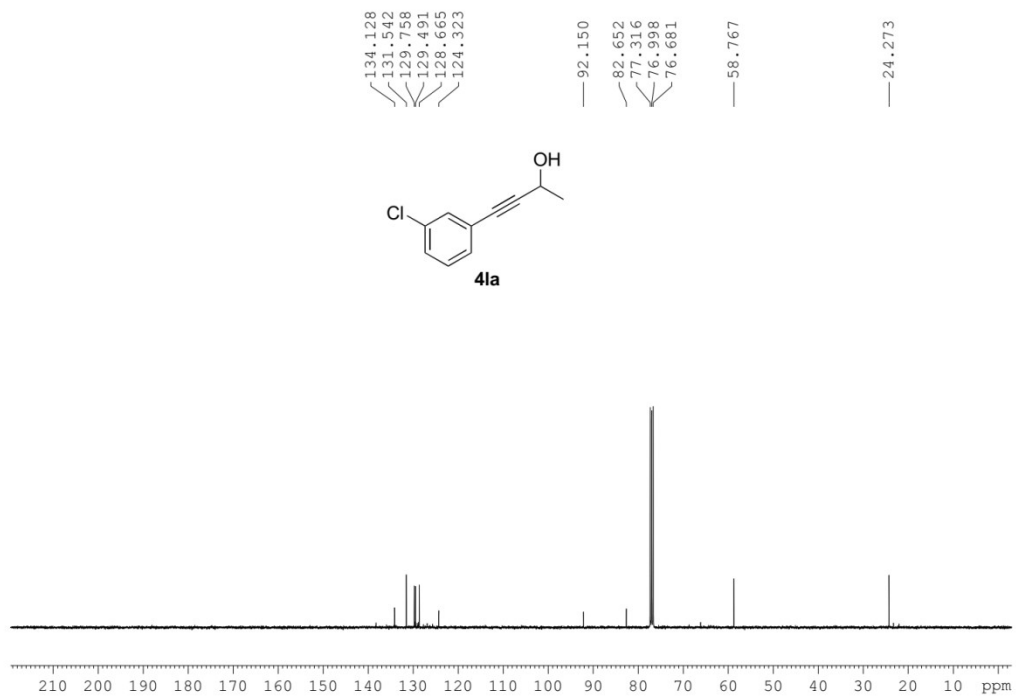

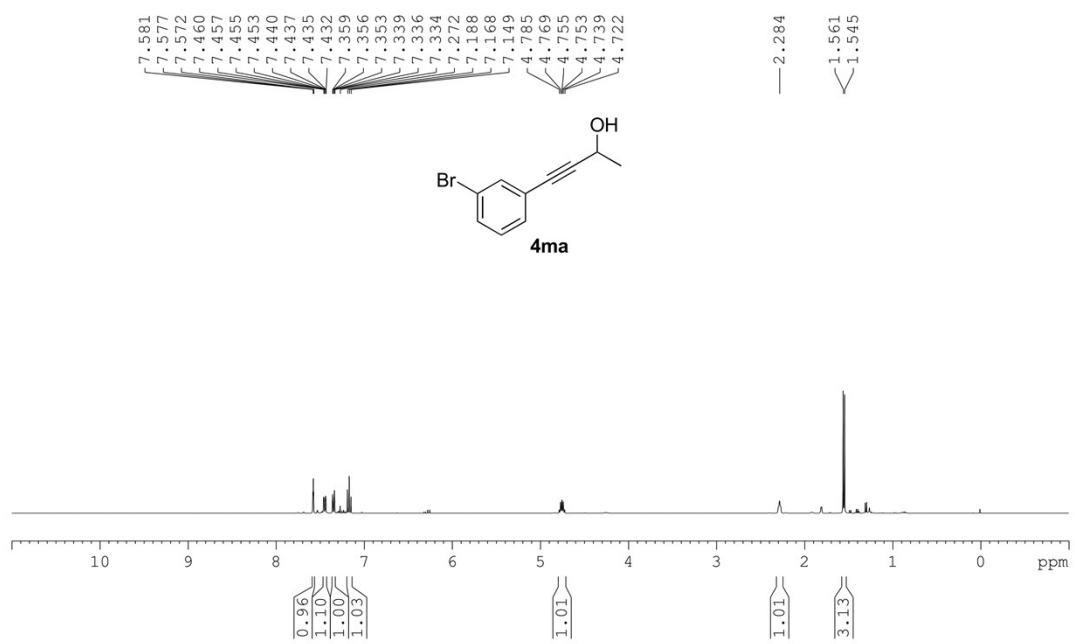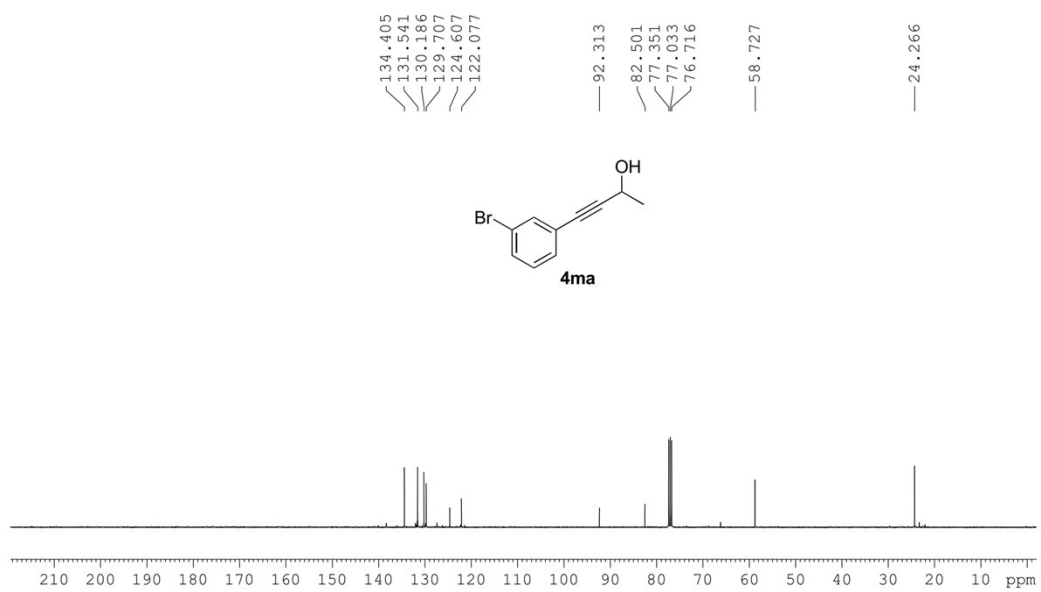

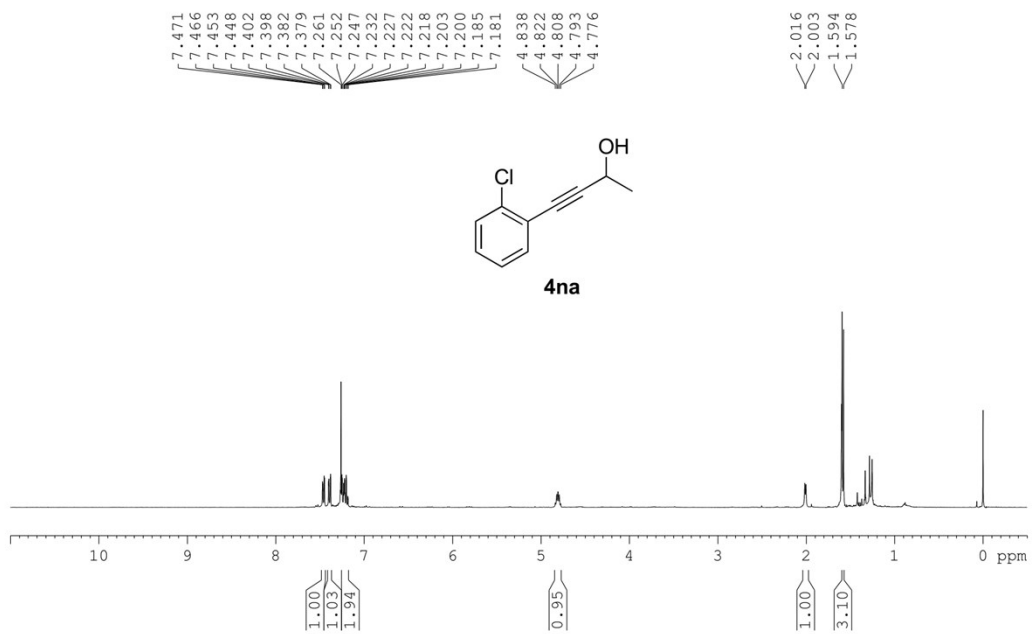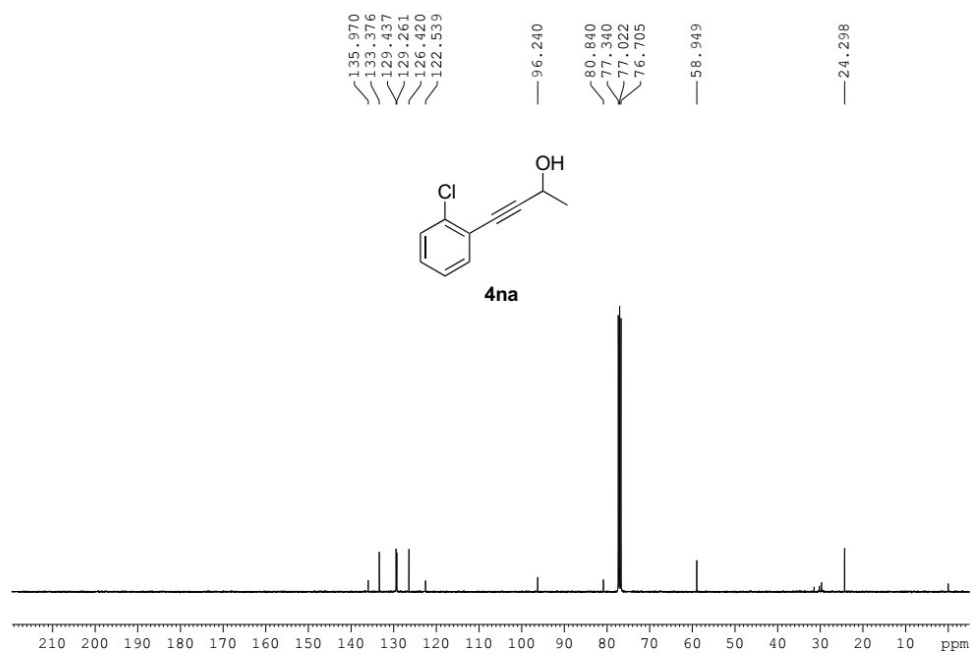





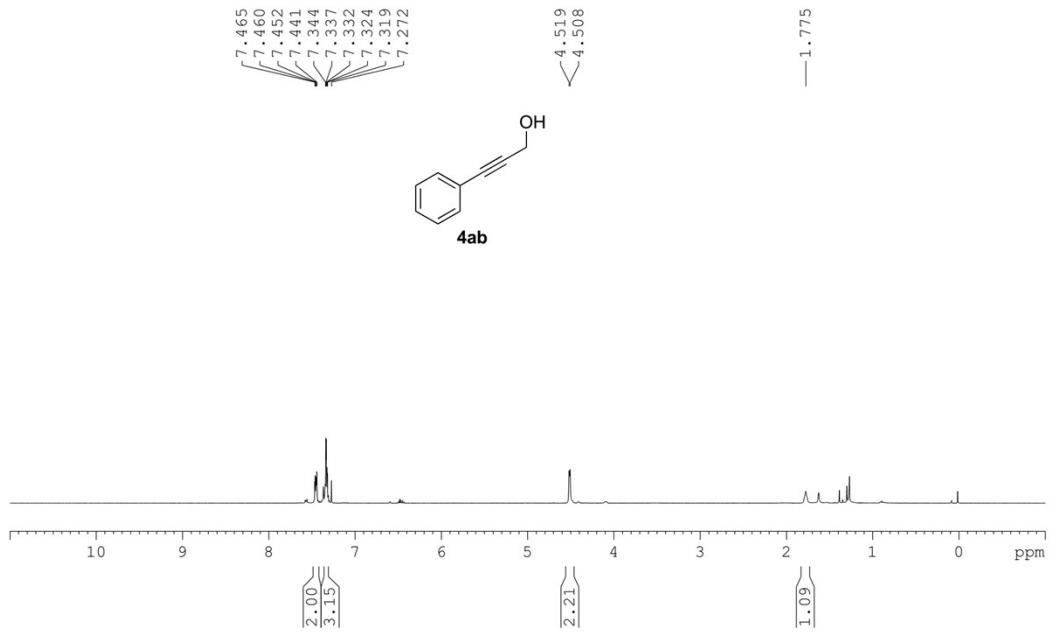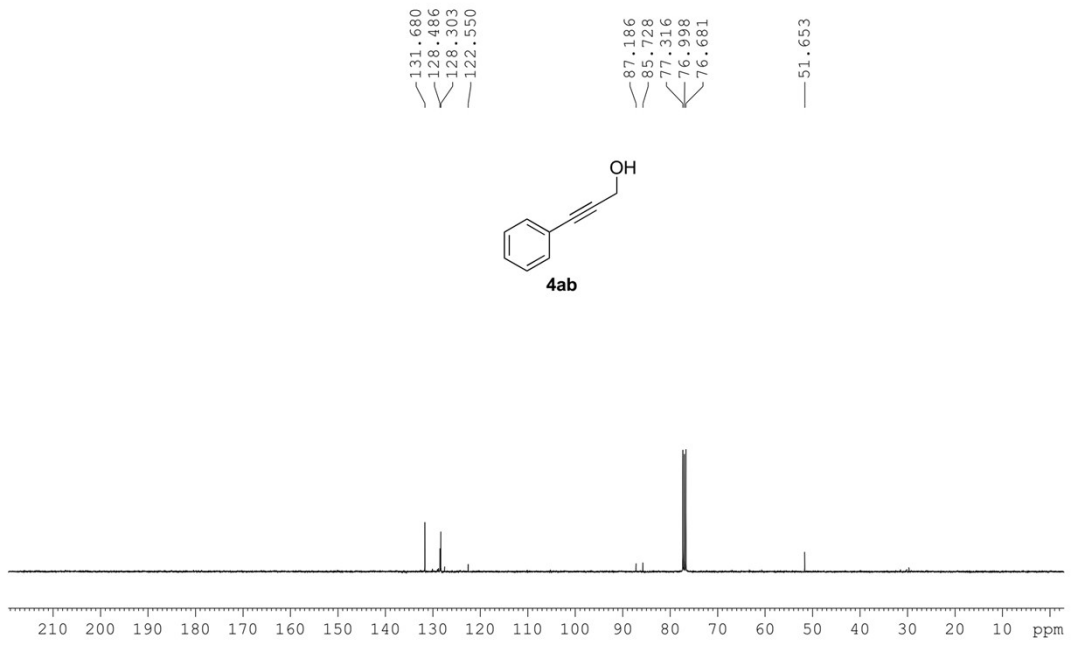

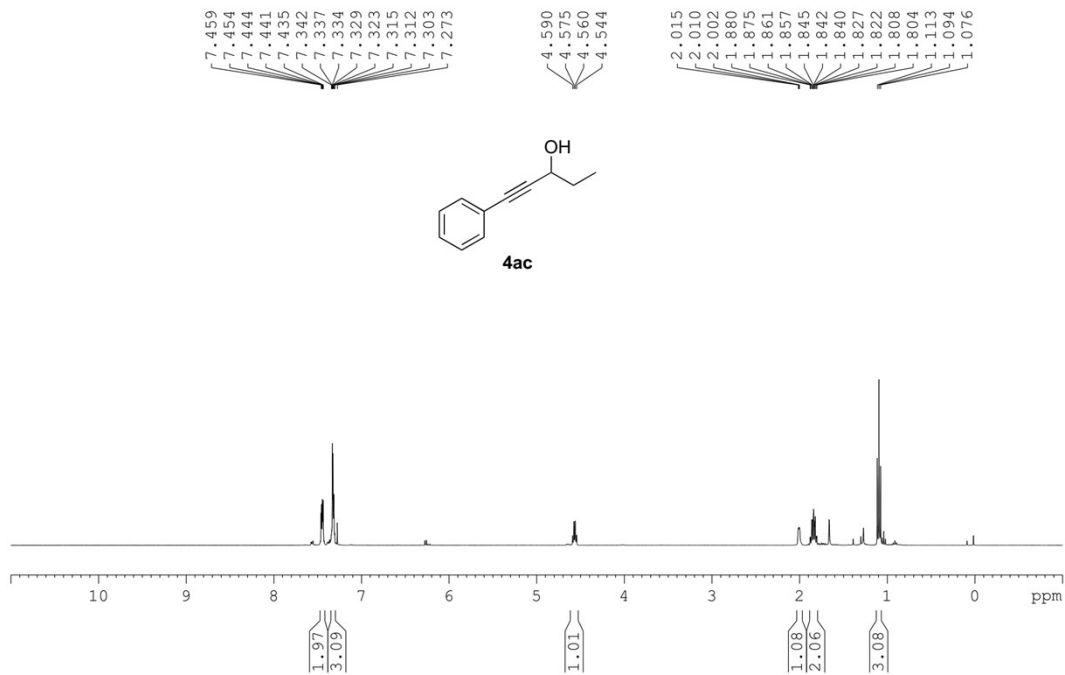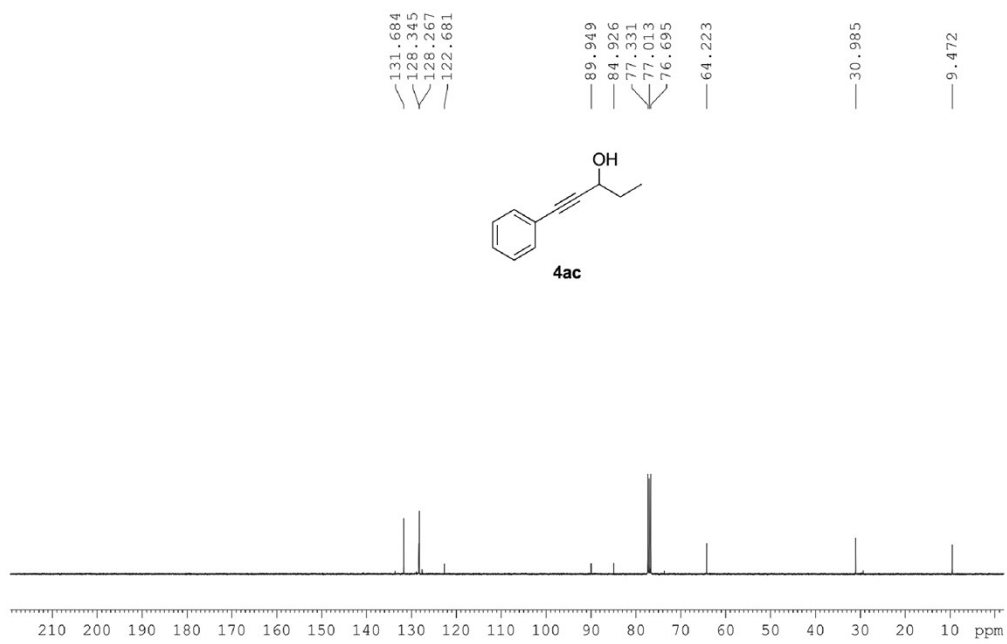

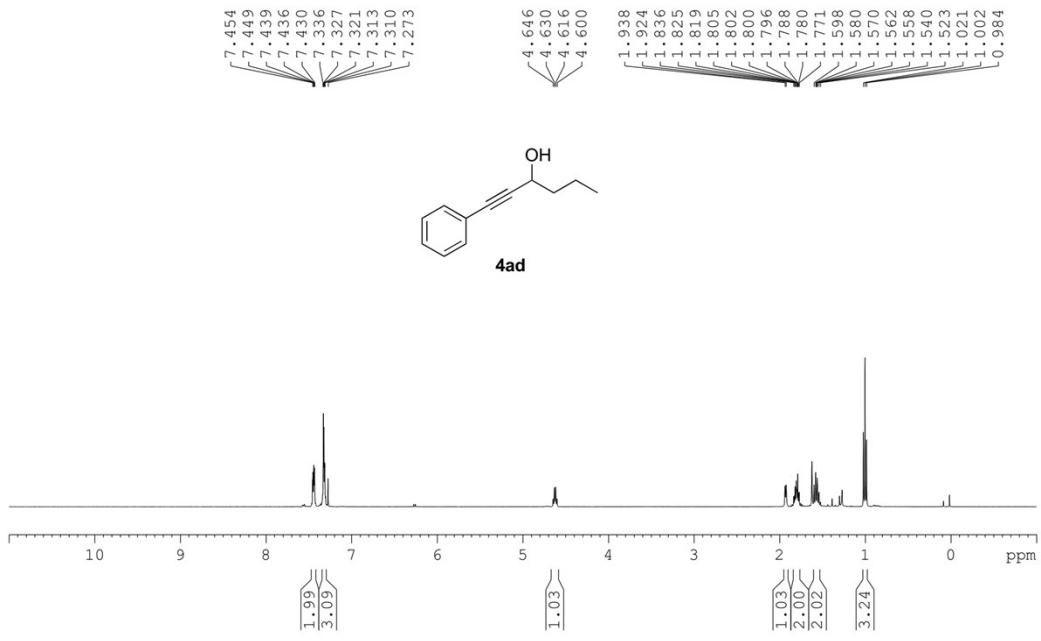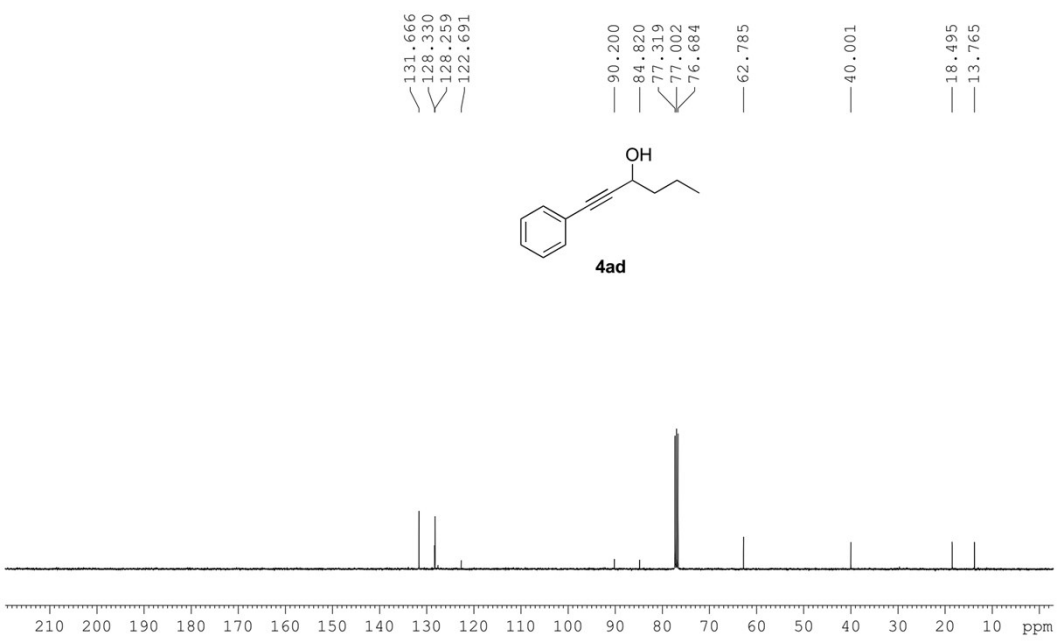

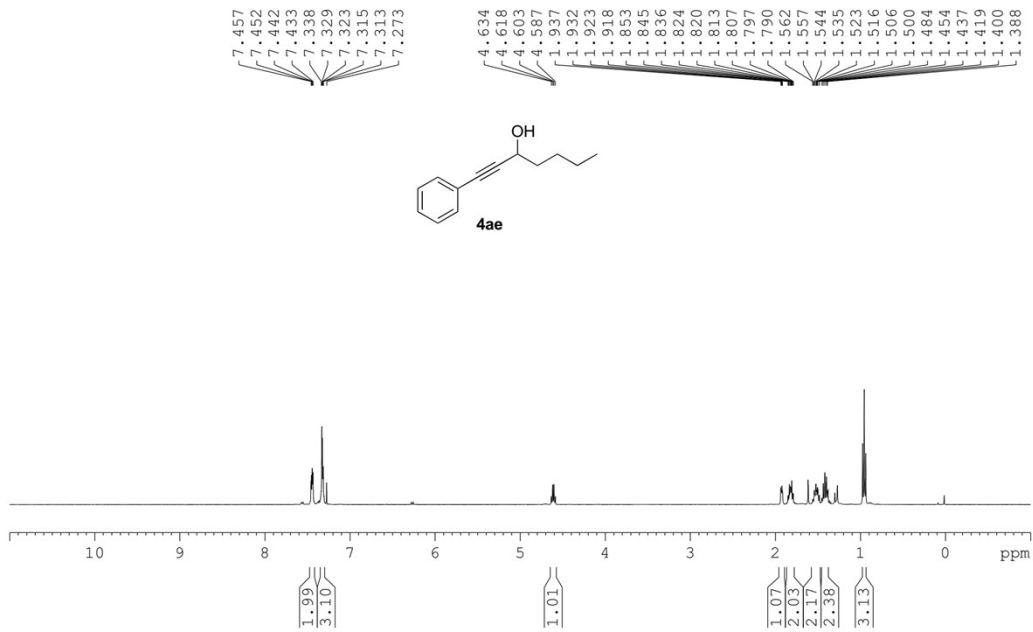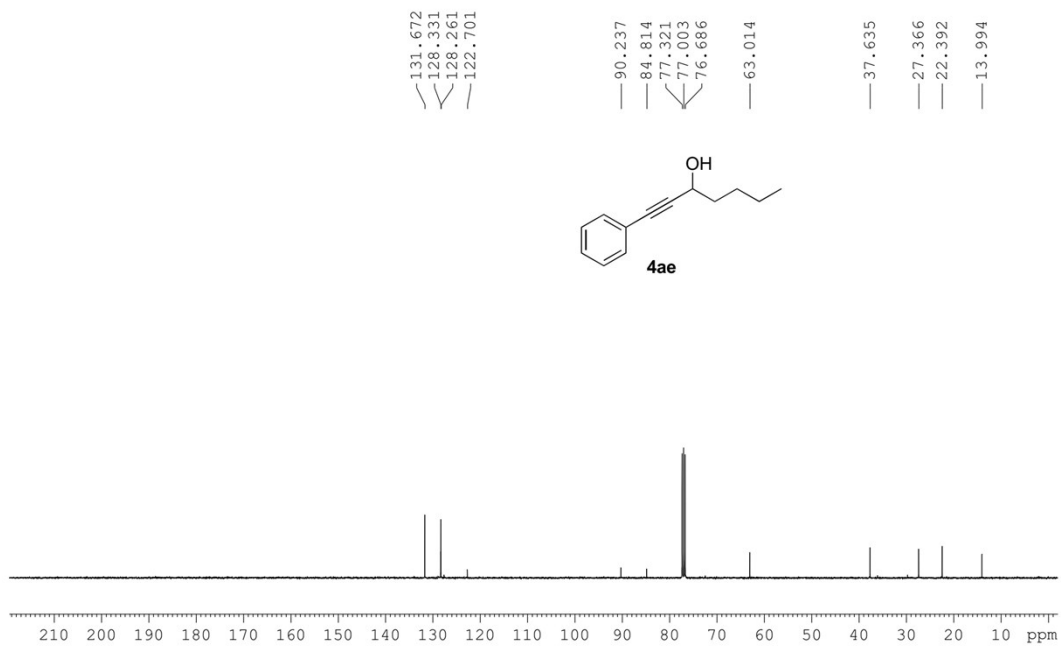

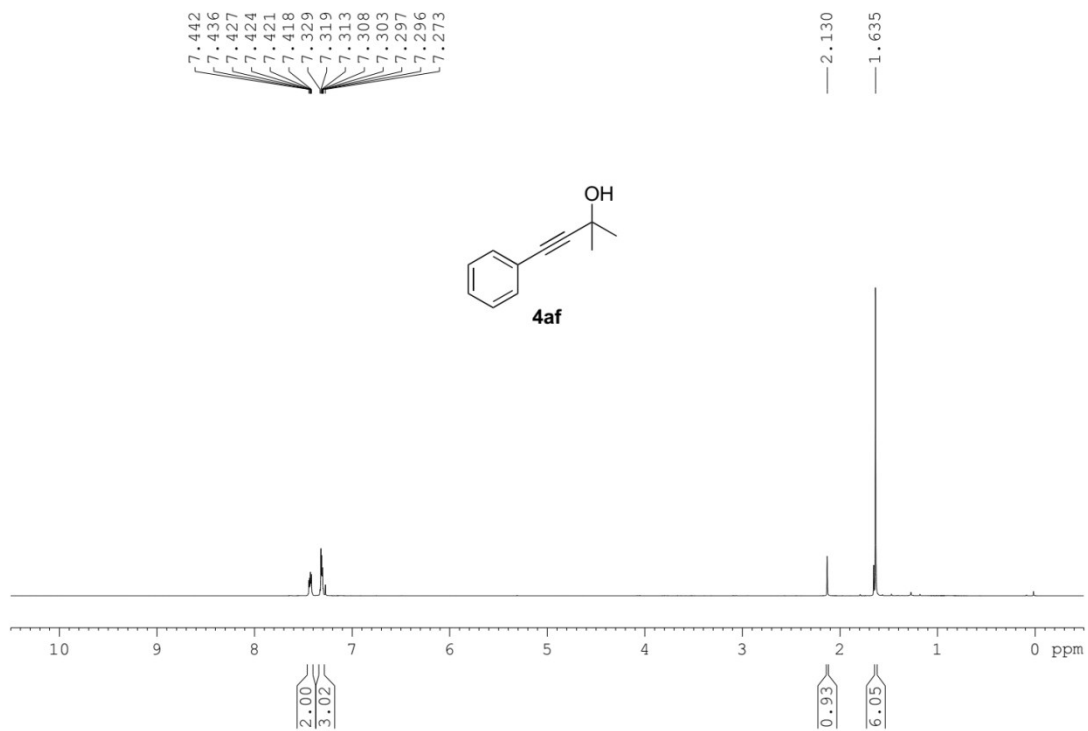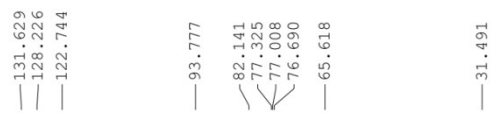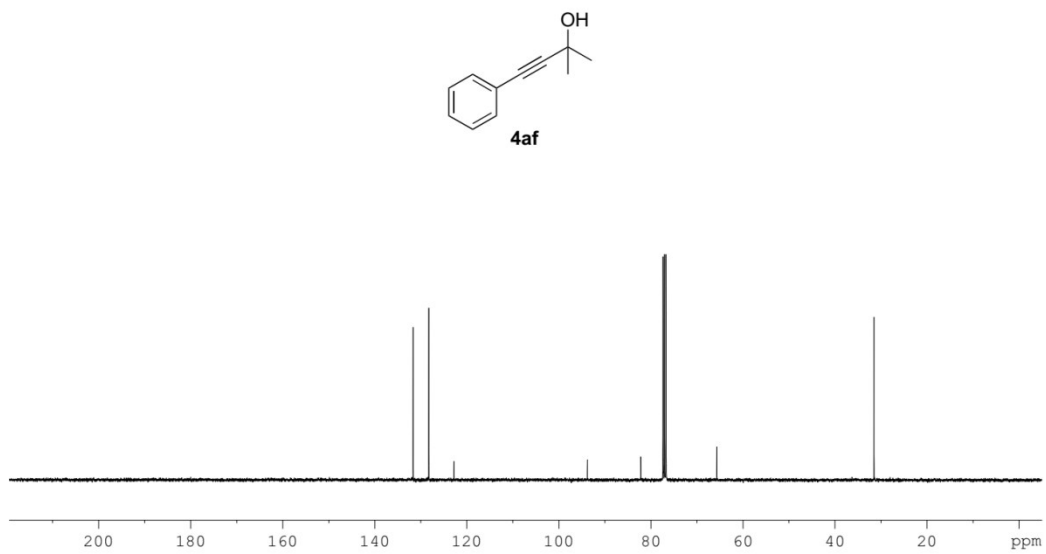

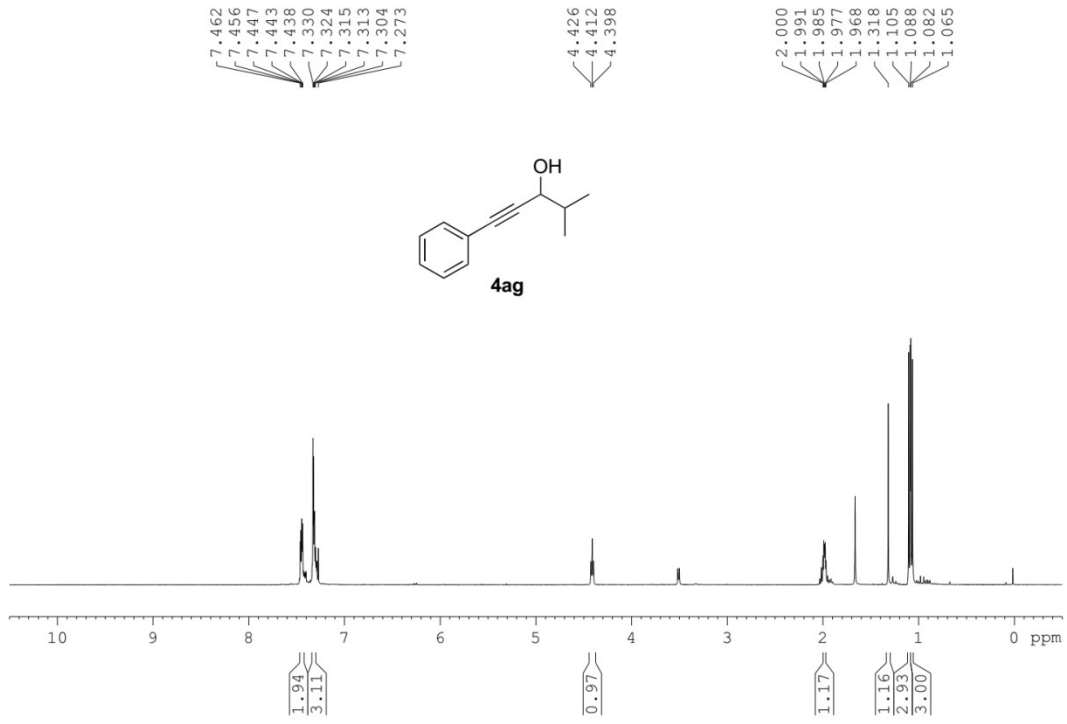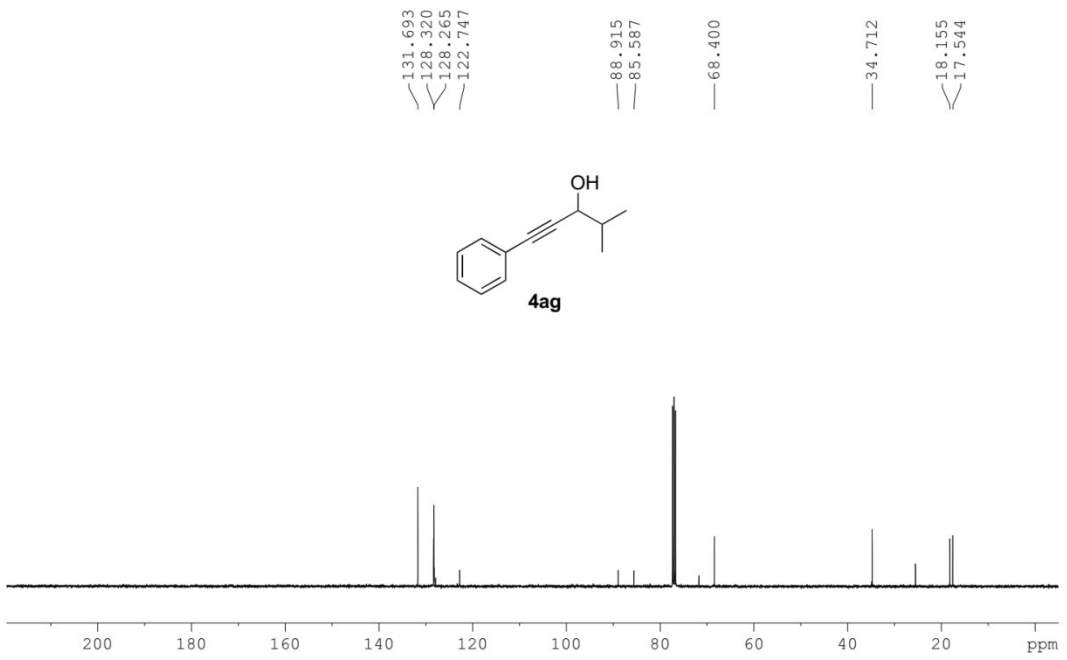

Supplement: c9cc04090k1.pdf [file c9cc04090k1.pdf]
